# Supplementary material for: The association between insulin therapy and depression in patients with type 2 diabetes mellitus: a meta-analysis
Source: PubMed Central journal article supplement — BMJ Open. 2018 Nov 28;8(11):e020062. doi: 10.1136/bmjopen-2017-020062 (PMC6278799; doi:10.1136/bmjopen-2017-020062), 2018-11-28
Supplement: bmjopen-2017-020062.draft_revisions.pdf [file bmjopen-2017-020062.draft_revisions.pdf]

# BMJ Open

BMJ Open is committed to open peer review. As part of this commitment we make the peer review history of every article we publish publicly available.

When an article is published we post the peer reviewers' comments and the authors' responses online. We also post the versions of the paper that were used during peer review. These are the versions that the peer review comments apply to.

The versions of the paper that follow are the versions that were submitted during the peer review process. They are not the versions of record or the final published versions. They should not be cited or distributed as the published version of this manuscript.

BMJ Open is an open access journal and the full, final, typeset and author-corrected version of record of the manuscript is available on our site with no access controls, subscription charges or pay-per-view fees (<http://bmjopen.bmj.com>).

If you have any questions on BMJ Open's open peer review process please email [info.bmjopen@bmj.com](mailto:info.bmjopen@bmj.com)

# BMJ Open

## The association between insulin therapy and depression in patients with type 2 diabetes mellitus: a meta-analysis

|                                 |                                                                                                                                                                                                                                                                                                                                                        |
|---------------------------------|--------------------------------------------------------------------------------------------------------------------------------------------------------------------------------------------------------------------------------------------------------------------------------------------------------------------------------------------------------|
| Journal:                        | <i>BMJ Open</i>                                                                                                                                                                                                                                                                                                                                        |
| Manuscript ID                   | bmjopen-2017-020062                                                                                                                                                                                                                                                                                                                                    |
| Article Type:                   | Research                                                                                                                                                                                                                                                                                                                                               |
| Date Submitted by the Author:   | 11-Oct-2017                                                                                                                                                                                                                                                                                                                                            |
| Complete List of Authors:       | Bai, Xiaosu; People's Hospital of Longhua New District, Department of Endocrinology<br>Liu, Zhiming; People's Hospital of Longhua New District, Department of Endocrinology<br>Li, Zhisen; People's Hospital of Longhua New District, Department of Endocrinology<br>Yan, Dewen; the Second People's Hospital of Shenzhen, Department of Endocrinology |
| <b>Primary Subject Heading</b>: | Diabetes and endocrinology                                                                                                                                                                                                                                                                                                                             |
| Secondary Subject Heading:      | Mental health, Diabetes and endocrinology                                                                                                                                                                                                                                                                                                              |
| Keywords:                       | Depression, insulin, type 2 diabetes mellitus, meta-analysis, risk factor                                                                                                                                                                                                                                                                              |
|                                 |                                                                                                                                                                                                                                                                                                                                                        |

SCHOLARONE™  
Manuscripts

View Only

1  
2  
3 **The association between insulin therapy and depression in patients with type 2**  
4 **diabetes mellitus: a meta-analysis**  
5  
6  
7

8 Xiaosu Bai<sup>1\*</sup>, Zhiming Liu<sup>1</sup>, Zhisen Li<sup>1</sup>, Dewen Yan<sup>2</sup>  
9

10 <sup>1</sup>Department of Endocrinology, People's Hospital of Longhua New District, Shenzhen,  
11 China  
12

13 <sup>2</sup>Department of Endocrinology, the Second People's Hospital of Shenzhen, Shenzhen,  
14 China  
15  
16

17  
18  
19 **\*Corresponding author:**  
20

21 Xiaosu Bai  
22

23 Department of Endocrinology, People's Hospital of Longhua New District, No.38  
24 Jianshe Road, Shenzhen 518109, China  
25

26 Tel: +86-13925297135  
27

28 Email: bxslb@163.com  
29  
30  
31

32 **Word count: 2791**  
33  
34  
35  
36  
37  
38  
39  
40  
41  
42  
43  
44  
45  
46  
47  
48  
49  
50  
51  
52  
53  
54  
55  
56  
57  
58  
59  
60

## Abstract

**Objectives:** A large number of type 2 diabetes mellitus (T2DM) patients had depressive disorders. Whether insulin treatment was associated with increased risk of depression remained controversial. We performed a meta-analysis to evaluate the impact of insulin therapy on the development of depression.

**Design:** A meta-analysis.

**Methods:** We conducted a systematic search of PubMed, PsycINFO, Embase and the Cochrane Library from their inception to April 2016. Epidemiological studies comparing the prevalence of depression between insulin users and non-insulin users were included. Random-effects models were used for meta-analysis. The adjusted and crude data were analyzed.

**Results:** Twenty-eight studies were included. Twelve studies presented adjusted ORs. Insulin therapy significantly increased the risk of depression (OR = 1.41, 95% CI 1.13-1.76, P = 0.003). Twenty-four studies were available for the crude data. Insulin therapy also substantially increased the odds for developing depression (OR = 1.59, 95% CI 1.41-1.80, P < 0.001). When comparing insulin therapy with oral-antidiabetic drugs, significant correlations remained for adjusted (OR = 1.42, 95% CI 1.08-1.86, P = 0.008) and crude (OR = 1.61, 95% CI 1.35-1.93, P < 0.001) data.

**Conclusions:** Our meta-analysis confirmed that patients on insulin therapy had significantly increased prevalence of depressive symptoms.

**Keywords:** Depression; insulin; type 2 diabetes mellitus; meta-analysis; risk factor

### Strengths and limitations of this study

- The primary strength of this study was the systematic and expansive search of multiple databases, which minimized the risk of missing data.
- Both of the adjusted and crude effect estimates were analyzed and demonstrated consistent results.
- Our findings mainly relied on cross-sectional data; as such, the causal and temporal relationship between insulin use and depression could not be established.

1  
2  
3  
4  
5  
6  
7  
8  
9  
10  
11  
12  
13  
14  
15  
16  
17  
18  
19  
20  
21  
22  
23  
24  
25  
26  
27  
28  
29  
30  
31  
32  
33  
34  
35  
36  
37  
38  
39  
40  
41  
42  
43  
44  
45  
46  
47  
48  
49  
50  
51  
52  
53  
54  
55  
56  
57  
58  
59  
60

- Some studies had a small sample size which may influence the statistical power.
- The findings of insulin therapy versus specific oral drugs and the prevalence of depression were not illustrated due to inclusion of less number of studies in each subset.

For peer review only

## INTRODUCTION

Diabetes and depression are major global public health problems, both of which are likely to be among the five leading causes of disease burden by 2030.[1] Approximately 90% of adults currently diagnosed with diabetes have type 2 diabetes (T2DM).[2] Recently, a bidirectional link between T2DM and depression has been recognized.[3] Meta-analysis showed that depression was associated with a 60% increased risk of T2DM.[4] Meanwhile, T2DM was associated with a 24% increased risk of depressive symptoms.[5] Further, depression adversely affected the prognosis and quality of life.[6, 7] Growing evidence showed that T2DM and depression may share similar lifestyle factors and biological origins.[3]

T2DM is a chronic and progressive disease characterized by insulin resistance and dysfunction of the pancreatic islet beta cells.[8, 9] For T2DM patients, insulin is the cornerstone of treatment for lowering glucose and HbA1c concentrations.[10] Although the optimal timing and indications for insulin therapy remained controversial,[11-13] most patients will inevitably require insulin therapy to attain adequate glycemic control in the natural history of T2DM.[11, 14]

However, insulin treatment seems less popular than oral hypoglycemic medications. Approximately 25% of the T2DM patients are reluctant to take insulin as the “last-resort” option.[15] Some patients may experience considerable psychological disorders with the transition from oral anti-diabetic drugs to insulin. Additionally, depressive symptoms was more commonly seen in patients with more frequent insulin injections per day.[16] However, the correlations between insulin use and the depression were inconsistent among the previous evidence. Several studies demonstrated positive correlation,[17-19] whereas other studies opposed.[20-22] Besides, these studies varied in enrolled population, adjustment of confounding factors, and depression assessment tools. Thus, we conducted a systematic review and meta-analysis to clarify the association between insulin therapy and the development of depression in T2DM patients.

## METHODS

### Search strategy

This study was guided by the Meta-analysis of Observational Studies in Epidemiology guidelines.[23] We conducted a systematic computerized search of Pubmed, Ovid PsycINFO, Embase, and the Cochrane Library for eligible studies from their inception to April 2016. The following keywords and medical subject headings were combined: (depression OR depressive) AND (diabetes OR diabetic) AND insulin AND (cross-sectional OR population-based OR cohort OR prospective OR retrospective OR prevalence OR survey OR database OR trial). The language was restricted to English. We also manually screened the reference lists of selected studies for potentially relevant records.

### Inclusion and exclusion criteria

We included studies that: (1) investigated the development of depression in insulin users and non-insulin users (oral anti-diabetic drug, diet, or no treatment) among T2DM patients; (2) reported adjusted/unadjusted odds ratios (ORs) or risk ratios (RRs), or presented raw data which could produce crude effect estimates; (3) assessed depression by self-report measures or diagnostic interviews. The self-report scales including the Patient Health Questionnaire (PHQ), Beck Depression Inventory (BDI), and the Center for Epidemiologic Studies–Depression (CES-D) Scale.[24] The diagnostic interviews were based on the criteria by DSM or ICD.[25, 26] A threshold score was not defined as no consensus was available and the threshold varied in different clinical settings. Studies were excluded if: (1) T2DM was mixed with type 1 diabetes; (2) the comparison was conducted between T2DM and non-T2DM patients; (3) depression could not be distinguished from anxiety or distress; (4) ORs or RRs could not be obtained or calculated. For example, we excluded studies only reporting mean and standard deviations of outcome measures.

### Data collection and quality assessment

Two reviewers independently screened titles and abstracts for eligible studies and extracted the data. Any disagreement was resolved by consensus. The following study characteristics were extracted: author, publication year, study design, country, sample size, mean or median age, proportion of males, depression diagnostic criteria,

1  
2  
3 compared groups, and adjustment of effect estimates. Both of the unadjusted and  
4 adjusted effect estimates and 95% CIs were directly extracted or indirectly calculated.  
5  
6 The degree of adjustment for confounders were categorized as: “+” for age and/or sex  
7 only; “++” for these further adjusted for more than 2 standard sociobehavioral risk  
8 factors (i.e., education, race, marital status, insurance, exercise, occupation, smoking  
9 status, alcohol consumption, family history of diabetes, and BMI); “+++” for these  
10 plus two or more clinical factors, including dyslipidemia, hypertension,  
11 cardiovascular disease, duration of T2DM, HbA1c level, treatment intensity, and  
12 diabetic complications. The quality was assessed by the modified Newcastle-Ottawa  
13 Scale (NOS).[27] This scale awarded a maximum of eight points to each study, with  
14 six or less points indicating a high risk of bias.

### 23 **Statistical analysis**

24  
25 As most included studies were cross-sectional, effect sizes had to be expressed as  
26 odds ratios (ORs). Given the low prevalence of depression in T2DM patients, the risk  
27 ratio (RR) reported by prospective study approximated the OR. Where available, the  
28 fully adjusted OR was pooled into meta-analysis to avoid the bias caused by  
29 confounding factors. However, the degree of adjustment and the variables entering  
30 into regression models varied between included studies. Thus, we additionally pooled  
31 the unadjusted ORs for data homogeneity. When only raw data were available, the  
32 crude ORs were calculated by using a random Mantel-Haenszel method. The  
33 random-effects model was used for meta-analysis. Heterogeneity was assessed by the  
34 Cochran Q statistics and  $I^2$  values.  $P < 0.05$  was regarded as significant heterogeneity  
35 for the Q test.  $I^2$  ranged between 0% (no heterogeneity) and 100% (high  
36 heterogeneity), with values around 25, 50, and 75% suggesting low, moderate, and  
37 high heterogeneity.[28] To weigh up the relative influence of each individual study,  
38 sensitivity analysis was performed by excluding one study at a time and assessing  
39 alteration in pooled results. Subgroup analyses and meta-regression analyses were  
40 performed using the following variables: compared groups (insulin vs. non-drug  
41 therapy or insulin vs. oral anti-diabetic drugs), degree of adjustment of confounders  
42 (+, ++ or +++), region (USA, Asia, Europe, or Africa), identification of depression  
43  
44  
45  
46  
47  
48  
49  
50  
51  
52  
53  
54  
55  
56  
57  
58  
59  
60



(self-report questionnaire or medical records), sample size ( $\geq 1000$  or  $< 1000$ ), mean age ( $\geq 60$  or  $< 60$ ), percentage male ( $\geq 50$  or  $< 50$ ), and NOS scale (7/8, or  $< 7$ ). Publication bias was statistically assessed by Egger and Begg tests, with  $P < 0.05$  indicating significant asymmetry.[29, 30] Also, we visually inspected the funnel plot for publication bias. All analyses were conducted by the Stata software (version 12.0; StataCorp, College Station, TX). A P value of less than 0.05 was considered significant.

## RESULTS

### Study selection

We identified 595 articles from Pubmed, 836 articles from PsycINFO, 359 articles from Embase, and 312 articles from Cochrane Library, with a total of 2102 records. We removed 461 duplicates. Further, 399 full-text articles were assessed for eligibility. After excluding 353 records with insufficient or irrelevant data, 46 studies were included into qualitative synthesis. We excluded 5 studies enrolling mixed type 1 and type 2 diabetic patients, 3 studies comparing depression between DM and non-DM patients, 4 studies only comparing the mean or median scores of depression questionnaire, 4 studies only reporting the regression or correlation coefficient, 1 study presenting a mixed outcome of depression and anxiety, and 2 studies reporting a mixed treatment regimen of insulin or oral drugs. Finally, 28 studies were included into meta-analysis. The flow diagram was shown in Figure 1.

### Study characteristics and quality assessment

Among the 28 studies pooled into meta-analysis, except for 1 prospective cohort,[31] most were cross-sectional studies. A worldwide distribution was displayed, including 5 studies of USA, 8 European studies, 10 Asian studies, 2 African studies, 1 South-American study, and 1 study mixed of South-American and European population. The sample size ranged from 90 to 229 047. The prevalence of depression ranged from 3.4 to 51.1%. Seven studies reported both of the adjusted and unadjusted ORs,[17, 20, 21, 32-35] 5 studies only reported the adjusted ORs,[31, 36-39] and unadjusted ORs could only be retrieved from 16 studies.[18, 40-54] Descriptive data

1  
2  
3 of the included studies were summarized in Table 1. In quality assessment, all studies  
4 had low to moderate risk of bias, with the scores ranging from 6 to 8. The items  
5 satisfied least were the control of confounding factors (12/28) and the report of  
6 response rates or follow-up data (10/28) (Table 2).  
7  
8  
9  
10  
11  
12  
13  
14  
15  
16  
17  
18  
19  
20  
21  
22  
23  
24  
25  
26  
27  
28  
29  
30  
31  
32  
33  
34  
35  
36  
37  
38  
39  
40  
41  
42  
43  
44  
45  
46  
47  
48  
49  
50  
51  
52  
53  
54  
55  
56  
57  
58  
59  
60

For peer review only

1  
2  
3  
4  
5  
6  
7  
8  
9  
10  
11  
12  
13  
14  
15  
16  
17  
18  
19  
20  
21  
22  
23  
24  
25  
26  
27  
28  
29  
30  
31  
32  
33  
34  
35  
36  
37  
38  
39  
40  
41  
42  
43  
44  
45  
46  
47

**Table 1. Characteristics of included studies**

| Author (year)       | Design          | Study setting | No. of patients | Mean age, years | Country | Male, % | Depression prevalence, % | Depression assessment | Compared groups                                   | Source of estimates | Adjusted factors                                                                                                                                                 |
|---------------------|-----------------|---------------|-----------------|-----------------|---------|---------|--------------------------|-----------------------|---------------------------------------------------|---------------------|------------------------------------------------------------------------------------------------------------------------------------------------------------------|
| Katon et al. (2004) | Cross-sectional | Community     | 4193            | 65              | USA     | 51      | 20.5                     | PHQ-9                 | Insulin vs. non-drug                              | Adjusted            | Age, sex, education, marital status, employment, race, BMI and smoking, Rx Risk score, HbA1c, duration of diabetes, treatment intensity, number of complications |
| Bell et al. (2005)  | Cross-sectional | Community     | 696             | 74              | USA     | 50.7    | 15.8                     | CES-D                 | Insulin vs. oral medication; insulin vs. non-drug | Adjusted            | Age, sex, ethnicity, education, marital status, income, diabetes duration, number of medications, BMI, HbA1c, chronic conditions, PCS score                      |
| Noh et al. (2005)   | Hospital-based  | Hospital      | 204             | 53              | Korean  | 53      | 32.4                     | BDI                   | Insulin vs. oral medication                       | Adjusted            | Age, sex, BMI, duration of diabetes, HbA1c, occupation, education, marital status, family                                                                        |

1  
2  
3  
4  
5  
6  
7  
8  
9  
10  
11  
12  
13  
14  
15  
16  
17  
18  
19  
20  
21  
22  
23  
24  
25  
26  
27  
28  
29  
30  
31  
32  
33  
34  
35  
36  
37  
38  
39  
40  
41  
42  
43  
44  
45  
46  
47

|                        |                    |                                          |       |      |                           |      |      |                 |                          |            |                                                                                                                                                            |                                                                                         |
|------------------------|--------------------|------------------------------------------|-------|------|---------------------------|------|------|-----------------|--------------------------|------------|------------------------------------------------------------------------------------------------------------------------------------------------------------|-----------------------------------------------------------------------------------------|
|                        |                    |                                          |       |      |                           |      |      |                 |                          |            |                                                                                                                                                            | history of diabetes, hypertension, diabetic complications, cerebrovascular disease, IHD |
| Hermanns et al. (2006) | Cross-sectional    | Hospital                                 | 236   | 52.2 | Germany                   | 60.6 | 33   | BDI; CES-D      | Insulin vs. non-insulin  | Unadjusted | NA                                                                                                                                                         |                                                                                         |
| Paraskar et al. (2007) | Prospective cohort | Medicare Health Maintenance Organization | 792   | 72   | USA                       | 44   | 17.3 | CES             | Insulin vs. sulfonylurea | Adjusted   | Age, sex, number of prescriptions, antidiabetic medication, perceived health status, health related quality of life, number of hospitalizations, ER visits |                                                                                         |
| Li et al. (2008)       | Cross-sectional    | Surveillance Program                     | 16651 | ≥18  | USA                       | 42   | 14.4 | PHQ             | Insulin vs. non-insulin  | Unadjusted | NA                                                                                                                                                         |                                                                                         |
| Ali et al. (2009)      | Cross-sectional    | Hospital                                 | 3845  | NA   | Mixed (South Asia and UK) | 52.8 | 9.3  | Medical records | Insulin vs. non-insulin  | Adjusted   | Age, gender, comorbidities, complications, insulin and oral anti-diabetic medication use, BMI, HbA1c, duration of diabetes, and                            |                                                                                         |

1  
2  
3  
4  
5  
6  
7  
8  
9  
10  
11  
12  
13  
14  
15  
16  
17  
18  
19  
20  
21  
22  
23  
24  
25  
26  
27  
28  
29  
30  
31  
32  
33  
34  
35  
36  
37  
38  
39  
40  
41  
42  
43  
44  
45  
46  
47

|                         |                 |            |     |      |          |      |      |                        |                             |            |  |                                                                                                                                                                            |
|-------------------------|-----------------|------------|-----|------|----------|------|------|------------------------|-----------------------------|------------|--|----------------------------------------------------------------------------------------------------------------------------------------------------------------------------|
|                         |                 |            |     |      |          |      |      |                        |                             |            |  | deprivation                                                                                                                                                                |
| Raval et al. (2010)     | Cross-sectional | Hospital   | 300 | 54   | India    | 49   | 41   | PHQ-9                  | Insulin vs. non-insulin     | Adjusted   |  | Age, gender, obesity, diabetic complications, blood pressure, duration of disease, income, education, BMI, HbA1c, diabetic complications, dyslipidemia, number of medicine |
| Zuberi et al. (2011)    | Cross-sectional | Hospital   | 286 | 52   | Pakistan | 39.2 | 50   | HADS                   | Insulin vs. oral medication | Unadjusted |  | NA                                                                                                                                                                         |
| Stanković et al. (2011) | Cross-sectional | Hospital   | 90  | 55.5 | Serbia   | 34.4 | 51.1 | PHQ, BDI, or interview | Insulin vs. oral medication | Unadjusted |  | NA                                                                                                                                                                         |
| Lynch et al. (2012)     | Cross-sectional | Hospital   | 201 | NA   | USA      | 27.4 | 19.9 | CES-D                  | Insulin vs. non-insulin     | Unadjusted |  | NA                                                                                                                                                                         |
| Osme et al.             | Cross-sectional | Outpatient | 138 | ≥30  | Brazil   | 27.5 | 44.6 | HAD                    | Insulin                     | Unadjusted |  | NA                                                                                                                                                                         |

1  
2  
3  
4  
5  
6  
7  
8  
9  
10  
11  
12  
13  
14  
15  
16  
17  
18  
19  
20  
21  
22  
23  
24  
25  
26  
27  
28  
29  
30  
31  
32  
33  
34  
35  
36  
37  
38  
39  
40  
41  
42  
43  
44  
45  
46  
47

|                      |          |            |     |      |          |      |      |       |              |                |                                 |  |
|----------------------|----------|------------|-----|------|----------|------|------|-------|--------------|----------------|---------------------------------|--|
| (2012)               | ectional | clinic     |     |      |          |      |      |       |              | vs.non-insul   |                                 |  |
|                      |          |            |     |      |          |      |      |       |              | in             |                                 |  |
| Trento et al. (2012) | Cross-s  | Outpatient | 498 | 67.6 | Italy    | 52.6 | 14.2 | ZSDS  | Insulin      | Unadjusted     | NA                              |  |
|                      | ectional | clinic     |     |      |          |      |      |       |              | vs.non-insul   |                                 |  |
|                      |          |            |     |      |          |      |      |       |              | in             |                                 |  |
| Roy et al. (2012)    | Cross-s  | Outpatient | 417 | 53.2 | Banglade | 50.6 | 34   | PHQ-9 | Insulin      | vs. Adjusted   | Age, gender, education, income, |  |
|                      | ectional | clinic     |     |      | sh       |      |      |       | oral         |                | region, CVD, hypertension,      |  |
|                      |          |            |     |      |          |      |      |       | medication   |                | diabetic complications, BMI,    |  |
|                      |          |            |     |      |          |      |      |       | +diet;       |                | HbA1c                           |  |
|                      |          |            |     |      |          |      |      |       | insulin+oral |                |                                 |  |
|                      |          |            |     |      |          |      |      |       | medication   |                |                                 |  |
|                      |          |            |     |      |          |      |      |       | vs. oral     |                |                                 |  |
|                      |          |            |     |      |          |      |      |       | medication   |                |                                 |  |
|                      |          |            |     |      |          |      |      |       | +diet        |                |                                 |  |
| Joseph et al. (2013) | Cross-s  | Hospital   | 230 | 53.6 | India    | 51.7 | 45.2 | PHQ-9 | Insulin      | vs. Unadjusted | NA                              |  |
|                      | ectional |            |     |      |          |      |      |       | oral         |                |                                 |  |
|                      |          |            |     |      |          |      |      |       | medication   |                |                                 |  |

1  
2  
3  
4  
5  
6  
8  
9  
10  
11  
12  
13  
14  
15  
16  
17  
18  
19  
20  
21  
22  
23  
24  
25  
26  
27  
28  
29  
30  
31  
32  
33  
34  
35  
36  
37  
38  
39  
40  
41  
42  
43  
44  
45  
46  
47

For peer review only

|                               |                 |                   |      |      |           |      |      |       |                                     |            |                                                                                                                                                                                                                                       |
|-------------------------------|-----------------|-------------------|------|------|-----------|------|------|-------|-------------------------------------|------------|---------------------------------------------------------------------------------------------------------------------------------------------------------------------------------------------------------------------------------------|
| Hayashino et al. (2014)       | Cross-sectional | Hospital          | 3573 | 66   | Japan     | 61.1 | 3.4  | PHQ-9 | Insulin vs. oral medication or diet | Unadjusted | NA                                                                                                                                                                                                                                    |
| Gorska-Ciebidla et al. (2014) | Cross-sectional | Outpatient clinic | 276  | 74   | Poland    | 46   | 29.7 | GDS   | Insulin vs. oral medication         | Adjusted   | Age, sex, education, marital status, smoking, physical activity, duration of diabetes, BMI, HbA1c, lipids levels, diabetic complications, previous HA or use of HA drugs, hyperlipidemia, number of comorbid conditions, hypoglycemia |
| Sweileh et al. (2014)         | Cross-sectional | Hospital          | 294  | 60   | Palestine | 44.2 | 40.2 | BDI   | Insulin vs. non-insulin             | Unadjusted | NA                                                                                                                                                                                                                                    |
| Yi Zhang et al. (2015)        | Cross-sectional | Hospital          | 2538 | 56.4 | China     | 53   | 6.1  | PHQ-9 | Insulin vs. oral drugs              | Unadjusted | NA                                                                                                                                                                                                                                    |

1  
2  
3  
4  
5  
6  
7  
8  
9  
10  
11  
12  
13  
14  
15  
16  
17  
18  
19  
20  
21  
22  
23  
24  
25  
26  
27  
28  
29  
30  
31  
32  
33  
34  
35  
36  
37  
38  
39  
40  
41  
42  
43  
44  
45  
46  
47

|                                      |                 |                   |            |      |        |      |      |       |                                          |                |                                                                                                                                                                                |
|--------------------------------------|-----------------|-------------------|------------|------|--------|------|------|-------|------------------------------------------|----------------|--------------------------------------------------------------------------------------------------------------------------------------------------------------------------------|
| Rodriguez<br>Calvin et al.<br>(2015) | Cross-sectional | Hospital          | 275        | 64.5 | Spain  | 56.4 | 32.7 | BDI   | Insulin<br>oral<br>medication            | vs. Unadjusted | NA                                                                                                                                                                             |
| Camara et al.<br>(2015)              | Cross-sectional | Outpatient clinic | 491        | 58   | Guinea | 37   | 34.4 | HADS  | Insulin<br>oral<br>medication            | vs. Adjusted   | Age, HbA1c, hypertension, BMI, residence zone, socioeconomic status                                                                                                            |
| Sun et al.<br>(2015)                 | Cross-sectional | Community         | 229<br>047 | 57.4 | China  | 34.4 | 5.9  | PHQ-9 | Insulin<br>oral<br>medication<br>or diet | vs. Adjusted   | Age, sex, BMI, HbA1c, smoking, alcohol, physical activity, education, occupation, marital status, selfreport cardio-metabolic disorders, diabetes treatment, diabetes duration |
| Wu Zhang et al.<br>(2015)            | Cross-sectional | Hospital          | 412        | 59.8 | China  | 50.2 | 5.7  | BDI   | Insulin<br>oral<br>medication            | vs. Adjusted   | Age, gender, education, marital status, occupation, insurance, HbA1c, BMI, DM history, diabetic complications, duration of DM, smoking, alcohol, exercise,                     |



1  
2  
3  
4  
5  
6  
7  
8  
9  
10  
11  
12  
13  
14  
15  
16  
17  
18  
19  
20  
21  
22  
23  
24  
25  
26  
27  
28  
29  
30  
31  
32  
33  
34  
35  
36  
37  
38  
39  
40  
41  
42  
43  
44  
45  
46  
47

sleeping hours

|                          |                 |           |       |      |          |      |      |                 |                                  |                |                                                            |
|--------------------------|-----------------|-----------|-------|------|----------|------|------|-----------------|----------------------------------|----------------|------------------------------------------------------------|
| Luca et al. (2015)       | Cross-sectional | Hospital  | 128   | 64.7 | Italy    | 58.6 | 50.8 | HAM-D           | Insulin oral medication or diet  | vs. Unadjusted | NA                                                         |
| Kikuchi et al. (2015)    | Cross-sectional | Community | 4218  | 65.5 | Japan    | 57.1 | 10.6 | CES-D           | Insulin non-insulin              | vs. Unadjusted | NA                                                         |
| Jacob et al. (2016)      | Cross-sectional | Community | 90412 | 65.5 | Germany  | 50.2 | 30.3 | Medical records | Insulin non-insulin              | vs. Adjusted   | Age, gender, insurance, diabetic complications, CVD, HbA1c |
| Cois-Sagar et al. (2016) | Cross-sectional | Community | 411   | 70.8 | Spain    | 46.2 | 29.2 | PHQ-9           | Insulin oral medications or diet | vs. Unadjusted | NA                                                         |
| Habtewold et al. (2016)  | Cross-sectional | Hospital  | 276   | 44   | Ethiopia | 47   | 44.7 | PHQ-9           | Insulin oral medication          | vs. Unadjusted | NA                                                         |

BDI, Beck Depression Inventory; BMI, body mass index; BG, blood glucose; CES-D, Center for Epidemiologic Studies Depression; DBP,

1  
2  
3  
4  
5  
6  
7 diastolic blood pressure; ER, emergence room; GDS, Geriatric Depression Scale; HADS, Hospital Anxiety and Depression Scale; HAM-D,  
8 Hamilton rating scale for depression; IHD, ischemic heart disease; PCS, Physical Component Summary score; PHQ, Patient Health  
9 Questionnaire; SBP, systolic blood pressure; ZSDS, Zung Self-Rating Depression Scale.  
10  
11  
12  
13  
14  
15  
16  
17  
18  
19  
20  
21  
22  
23  
24  
25  
26  
27  
28  
29  
30  
31  
32  
33  
34  
35  
36  
37  
38  
39  
40  
41  
42  
43  
44  
45  
46  
47

For peer review only

1  
2  
3  
4  
5  
6  
7  
8  
9  
10  
11  
12  
13  
14  
15  
16  
17  
18  
19  
20  
21  
22  
23  
24  
25  
26  
27  
28  
29  
30  
31  
32  
33  
34  
35  
36  
37  
38  
39  
40  
41  
42  
43  
44  
45  
46  
47

**Table 2. Quality assessment of included studies by the modified Newcastle-Ottawa scale (NOS)**

| Author (year)           | Adequate definition of cases using insulin | Representativeness of cases using insulin | Selection of the non-insulin users | Ascertainment of insulin use | Depression was not present before initiation | Control of confounding factors | Assessment of depression response rates or follow-up data | Total score |
|-------------------------|--------------------------------------------|-------------------------------------------|------------------------------------|------------------------------|----------------------------------------------|--------------------------------|-----------------------------------------------------------|-------------|
| Katon et al. (2004)     | 1                                          | 1                                         | 1                                  | 1                            | 1                                            | 1                              | 1                                                         | 8           |
| Bell et al. (2005)      | 1                                          | 1                                         | 1                                  | 1                            | 1                                            | 1                              | 0                                                         | 7           |
| Noh et al. (2005)       | 1                                          | 0                                         | 1                                  | 1                            | 1                                            | 1                              | 0                                                         | 6           |
| Hermanns et al. (2006)  | 1                                          | 1                                         | 1                                  | 1                            | 1                                            | 0                              | 0                                                         | 6           |
| Pawaskar et al. (2007)  | 1                                          | 1                                         | 1                                  | 1                            | 1                                            | 1                              | 1                                                         | 7           |
| Li et al. (2008)        | 1                                          | 1                                         | 1                                  | 1                            | 1                                            | 0                              | 0                                                         | 6           |
| Ali et al. (2009)       | 1                                          | 1                                         | 1                                  | 1                            | 1                                            | 1                              | 0                                                         | 7           |
| Raval et al. (2010)     | 1                                          | 1                                         | 1                                  | 1                            | 1                                            | 1                              | 0                                                         | 7           |
| Zuberi et al. (2011)    | 1                                          | 1                                         | 1                                  | 1                            | 1                                            | 0                              | 1                                                         | 7           |
| Stanković et al. (2011) | 1                                          | 1                                         | 1                                  | 1                            | 1                                            | 0                              | 0                                                         | 6           |
| Lynch et al. (2012)     | 1                                          | 1                                         | 1                                  | 1                            | 1                                            | 0                              | 1                                                         | 7           |
| Osme et al. (2012)      | 1                                          | 1                                         | 1                                  | 1                            | 1                                            | 0                              | 0                                                         | 6           |

1  
2  
3  
4  
5  
6

---

|    |                      |                                |   |   |   |   |   |   |   |   |
|----|----------------------|--------------------------------|---|---|---|---|---|---|---|---|
| 7  | Trento et al. (2012) | 1                              | 1 | 1 | 1 | 1 | 0 | 1 | 0 | 6 |
| 8  | 9                    | Roy et al. (2012)              | 1 | 1 | 1 | 1 | 1 | 1 | 1 | 8 |
| 10 | 11                   | Joseph et al. (2013)           | 1 | 1 | 1 | 1 | 1 | 0 | 1 | 6 |
| 12 | 13                   | Hayashino et al. (2014)        | 1 | 1 | 1 | 1 | 1 | 0 | 1 | 6 |
| 14 | 15                   | Gorska-Ciebiada et al. (2014)  | 0 | 1 | 1 | 1 | 1 | 1 | 1 | 6 |
| 16 | 17                   | Sweileh et al. (2014)          | 1 | 1 | 1 | 1 | 1 | 0 | 1 | 7 |
| 18 | 19                   | YY Zhang et al. (2015)         | 1 | 1 | 1 | 1 | 1 | 0 | 1 | 7 |
| 20 | 21                   | Rodriguez Calvin et al. (2015) | 1 | 1 | 1 | 1 | 1 | 0 | 1 | 7 |
| 22 | 23                   | Camara et al. (2015)           | 1 | 1 | 1 | 1 | 1 | 0 | 1 | 6 |
| 24 | 25                   | Sun et al. (2015)              | 1 | 1 | 1 | 1 | 1 | 1 | 1 | 7 |
| 26 | 27                   | WJ Zhang et al. (2015)         | 1 | 1 | 1 | 1 | 1 | 1 | 1 | 8 |
| 28 | 29                   | Luca et al. (2015)             | 1 | 1 | 1 | 1 | 1 | 0 | 1 | 6 |
| 30 | 31                   | Kikuchi et al. (2015)          | 1 | 1 | 1 | 1 | 1 | 0 | 1 | 6 |
| 32 | 33                   | Jacob et al. (2016)            | 1 | 1 | 1 | 1 | 1 | 0 | 1 | 6 |
| 34 | 35                   | Cols-Sagarra et al. (2016)     | 1 | 1 | 1 | 1 | 1 | 0 | 1 | 6 |
|    |                      | Habtewold et al. (2016)        | 1 | 1 | 1 | 1 | 1 | 0 | 1 | 7 |

36  
37  
38  
39  
40  
41  
42  
43  
44  
45  
46  
47

### Meta-analysis of adjusted data

The adjusted ORs for the comparison of depression between insulin and non-insulin treated patients were reported by 12 studies. Compared with non-insulin treatment, insulin therapy was associated with a statistically significant higher risk of depression (OR = 1.41, 95% CI 1.13-1.76, P = 0.003). Significantly high heterogeneity was revealed ( $I^2 = 69.7\%$ ,  $P < 0.001$ ) (Figure 2).

The results of sensitivity analysis, which excluded the selected studies one by one, might vary by excluding several included studies (Supplementary Figure S1). To identify the sources of heterogeneity, we performed subgroup analyses based on several important confounding factors. Six studies particularly compared insulin with oral anti-diabetic drugs, and showed that insulin therapy was significantly associated with increased risk of depression (OR = 1.42, 95% CI 1.08-1.86, P = 0.008). For 2 studies comparing insulin with non-drug therapy, no significant association was revealed for insulin and depression (OR = 0.87, 95% CI 0.37-2.03, P = 0.745). Additionally, we investigated the impacts of degree of adjustment of confounders, region, identification of depression, sample size, mean age, percentage male, and NOS scale. The association remained significant for the subgroups of fully adjustment (+++), Asian studies, self-report questionnaires, sample size  $\geq 1000$ , mean age  $< 60.0$  years, percentage of male  $< 50.0\%$ , prevalence of depression over 20%, and NOS scale  $< 6$  (Table 3). Meta-regression analyses indicated a lack of effect measure modification by sample size (P = 0.93), mean age (P = 0.17), percentage male (P = 0.28) or prevalence of depression (P = 0.75).

**Table 3. Subgroup analyses for the studies reporting adjusted effect estimates**

| Subgroups                   | No. of studies | OR (95% CI)      | $I^2$ (P value) |
|-----------------------------|----------------|------------------|-----------------|
| <b>Compared groups</b>      |                |                  |                 |
| Insulin vs. oral drugs      | 6              | 1.42 (1.08-1.86) | 71.3% (< 0.05)  |
| Insulin vs. non-drugs       | 2              | 0.87 (0.37-2.03) | 66.5% (0.08)    |
| <b>Degree of adjustment</b> |                |                  |                 |

|                                     |    |                  |                |
|-------------------------------------|----|------------------|----------------|
| +++                                 | 10 | 1.43 (1.08-1.89) | 68.9% (< 0.05) |
| ++                                  | 2  | 1.24 (0.98-1.55) | 25.3% (0.25)   |
| <b>Region</b>                       |    |                  |                |
| USA                                 | 4  | 0.86 (0.57-1.31) | 36.4% (0.19)   |
| Asia                                | 5  | 1.81 (1.18-2.79) | 59% (0.05)     |
| Europe                              | 2  | 1.58 (0.85-2.94) | 92.9% (< 0.05) |
| Africa                              | 1  | 1.53 (0.99-2.37) | -              |
| <b>Identification of depression</b> |    |                  |                |
| Self-report questionnaire           | 10 | 1.42 (1.06-1.91) | 68.9% (< 0.05) |
| Medical records                     | 2  | 1.31 (1.00-1.71) | 65.6% (0.09)   |
| <b>Sample size</b>                  |    |                  |                |
| ≥ 1000                              | 4  | 1.46 (1.10-1.94) | 73.1% (< 0.05) |
| < 1000                              | 8  | 1.34 (0.93-1.93) | 70% (< 0.05)   |
| <b>Mean age</b>                     |    |                  |                |
| ≥ 60.0                              | 5  | 1.12 (0.77-1.62) | 78.8% (<0.05)  |
| < 60.0                              | 6  | 1.74 (1.24-2.43) | 50.8% (0.07)   |
| <b>Percentage male (%)</b>          |    |                  |                |
| ≥ 50.0                              | 7  | 1.26 (0.97-1.63) | 62.4% (<0.05)  |
| < 50.0                              | 5  | 1.71 (1.25-2.35) | 53.9% (0.07)   |
| <b>Prevalence of depression</b>     |    |                  |                |
| ≥ 20%                               | 7  | 1.48 (1.12-1.96) | 71.3% (< 0.05) |
| < 20%                               | 5  | 1.25 (0.80-1.95) | 72.7% (< 0.05) |
| <b>NOS scale</b>                    |    |                  |                |
| 7 or 8                              | 8  | 1.25 (0.94-1.66) | 60.0% (<0.05)  |
| <7                                  | 4  | 1.79 (1.14-2.80) | 84.6% (<0.05)  |

### Meta-analysis of unadjusted results

Twenty-four studies were available for the crude data. All studies were cross-sectional, and assessed depression by self-report scales. The studies presented three comparison types (insulin vs. non-drug therapy; insulin vs. oral anti-diabetic drugs; and insulin vs. non-insulin treatment). Data on the comparison between insulin and non-insulin therapy were preferred. The pooled results showed that T2DM patients on insulin therapy had significant higher risk of depression compared with those on non-insulin treatment (OR = 1.59, 95% CI 1.41-1.80,  $P < 0.001$ ) (Figure 3). The heterogeneity was at a significantly high level ( $I^2 = 59.8\%$ ,  $P < 0.001$ ). Sensitivity analysis revealed no significant variation in the pooled OR by exclusion of any included study (Supplementary Figure S2).

Seventeen studies compared insulin with oral anti-diabetic drugs, showing a significantly increased risk of depression for insulin therapy (OR = 1.61, 95% CI 1.35-1.93,  $P < 0.001$ ). For 6 studies comparing insulin use with non-drug treatment, a substantially higher risk of depression was revealed for insulin use (OR = 1.89, 95% CI 1.25-2.88,  $P = 0.002$ ). In the stratified analyses based on degree of adjustment of confounders, region, identification of depression, sample size, mean age, percentage male, and NOS scale, the significant association between insulin use and depression remained significant among all subgroups except the study conducted in South America (Table 4). In meta-regression analyses, sample size ( $P = 0.79$ ), mean age ( $P = 0.56$ ), percentage male ( $P = 0.80$ ), and the prevalence of depression ( $P = 0.68$ ) demonstrated no independent effect on the depression outcomes.

**Table 4. Subgroup analyses for the studies reporting the crude effect estimates**

| <b>Subgroups</b>       | No. of studies | OR (95% CI)      | $I^2$ (P value) |
|------------------------|----------------|------------------|-----------------|
| <b>Compared groups</b> |                |                  |                 |
| Insulin vs. oral drugs | 17             | 1.61 (1.35-1.93) | 62.6% (< 0.05)  |
| Insulin vs. non-drugs  | 6              | 1.89 (1.25-2.88) | 68.2% (< 0.05)  |
| <b>Region</b>          |                |                  |                 |
| USA                    | 4              | 1.53 (1.21-1.93) | 75.4% (< 0.05)  |

|                                 |    |                   |                |
|---------------------------------|----|-------------------|----------------|
| Asia                            | 9  | 1.60 (1.22-2.10)  | 75.4% (0.05)   |
| Europe                          | 7  | 1.59 (1.13-2.22)  | 45.3% (< 0.05) |
| Africa                          | 2  | 1.77 (1.23-2.54)  | 0 (0.85)       |
| South America                   | 1  | 1.28 (0.50-3.27)  | -              |
| <b>Sample size</b>              |    |                   |                |
| ≥1000                           | 7  | 1.64 (1.39-1.93)  | 77.5% (< 0.05) |
| < 1000                          | 17 | 1.56 (1.27-1.91)  | 46.7% (< 0.05) |
| <b>Mean age</b>                 |    |                   |                |
| ≥ 60.0                          | 10 | 1.60 (1.30-1.97)  | 61.8% (<0.05)  |
| < 60.0                          | 10 | 1.57 (1.18-2.09)  | 68.0% (<0.05)  |
| <b>Percentage male (%)</b>      |    |                   |                |
| ≥ 50.0                          | 13 | 1.59 (1.29-1.96)  | 75.1% (<0.05)  |
| < 50.0                          | 11 | 1.55 (1.43-1.68)  | 0.0 (0.71)     |
| <b>Prevalence of depression</b> |    |                   |                |
| ≥ 20%                           | 14 | 1.84 (1.59-2.12)  | 11.7% (0.33)   |
| < 20%                           | 10 | 1.43 (1.19 -1.70) | 74.0% (< 0.05) |
| <b>NOS scale</b>                |    |                   |                |
| 7 or 8                          | 11 | 1.45 (1.16-1.82)  | 72.3% (<0.05)  |
| <7                              | 13 | 1.72 (1.47-2.00)  | 42.8% (0.05)   |

### Publication bias

For studies reporting the adjusted ORs, the funnel plot was symmetrical (Figure 4). No publication bias was shown by the Egger test ( $P = 0.94$ ) or Begg's test ( $P = 0.67$ ). For studies presenting the crude ORs, the funnel plot was symmetrical (Figure 5). We did not detect publication bias by Egger ( $P = 0.39$ ) or Begg's test ( $P = 0.94$ ).

### DISCUSSION

This is the first meta-analysis that estimated the magnitude of the association between insulin therapy and depression. The pooled data of adjusted ORs proved that T2DM



1  
2  
3 patients on insulin treatment had a 41% increased prevalence of depressive syndromes  
4 compared to those without insulin therapy. When pooling crude ORs, the increased  
5 prevalence attained to 59%. We specifically compared insulin use with  
6 oral-antidiabetic drugs. Both of the adjusted data (OR = 1.42) and the unadjusted data  
7 (OR = 1.61) showed that insulin users had increased occurrence of depression.  
8  
9

10  
11  
12 The source of heterogeneity was explored carefully. In sensitivity analysis, no  
13 substantial change in heterogeneity was revealed when excluding any individual study,  
14 suggesting the homogeneity of the pooled effect estimates. The prevalence of  
15 depression could be different according to ethnicities.[55] In subgroup analyses of  
16 adjusted data, we found that the significance displayed for Asian studies.  
17 Non-significant result was shown for studies with sample size below 1000, suggesting  
18 that the result was unstable for small sample size. Substantial change of heterogeneity  
19 was also detected for the subgroups of insufficient degree of adjustment and  
20 depression identified by medical records. However, the number of eligible studies was  
21 rather small to draw firm conclusions. For studies of depression prevalence below  
22 20%, substantial change in the effect estimates was shown for adjusted data, and  
23 obvious change in heterogeneity for crude data. Thus, it may partly account for the  
24 heterogeneity. Finally, the treatment effect was detected if the mean age was < 60.0  
25 years, percentage male < 50.0%, and NOS < 7 for adjusted data. This might be due to  
26 that younger patients were associated with higher prevalence of depression, and  
27 women receiving insulin therapy might be under greater risk of depression compared  
28 to men.  
29  
30  
31  
32  
33  
34  
35  
36  
37  
38  
39  
40  
41  
42

43 The mechanisms link diabetes and depression were complex and still unclear.  
44 Depression and T2DM could develop in parallel through shared biological processes.  
45 The involved pathways include the innate inflammatory response, the  
46 hypothalamic-pituitary-adrenal axis, circadian rhythms, and insulin resistance.[3]  
47 Although the overall prevalence of depression is high in diabetic patients, the  
48 DESMOND trial reported that it was not so in newly diagnosed T2DM.[56]  
49 Screen-detected patients with T2DM showed low distress and anxiety at the time of  
50 diagnosis, with a significant increase during the following 12 months.[57] In  
51  
52  
53  
54  
55  
56  
57  
58  
59  
60

1  
2  
3 accordance with these findings, we confirmed that insulin therapy was associated with  
4 increased prevalence of depression. For patients on insulin therapy, they had less  
5 endogenous insulin and were therefore more susceptible to metabolic dysregulation  
6 than patients who might have some residual insulin secretory activity. Especially,  
7 patients who are more metabolically labile are more vulnerable to depression.[16]  
8 Besides, insulin therapy is always a symbol of more advanced type 2 diabetes. The  
9 patients' negative attitudes toward insulin therapy may contribute to delays for insulin  
10 initiation, prolonged duration of hyperglycemia, and increased risk of diabetic  
11 complications.[58] Psychological insulin resistance (PIR) has been defined as  
12 psychological opposition towards insulin treatment in both diabetic patients and their  
13 prescribers. They may display fear of insulin injection and self-testing, complex  
14 regimen, hypoglycemia, and weight gain; a perceived loss of control over one's life;  
15 poor self-efficacy concerning insulin treatment; and perceived lack of positive  
16 outcomes related to insulin.[58-60] These psychological aspects may explain for the  
17 increased risk of depression when insulin was prescribed.  
18  
19  
20  
21  
22  
23  
24  
25  
26  
27  
28  
29

30  
31 The primary strength of this study was the systematic and expansive search of  
32 multiple databases, which minimized the risk of missing data. The meta-analysis  
33 identified 28 studies enrolling worldwide-distributed participants. Both of the adjusted  
34 and crude effect estimates were analyzed and demonstrated consistent results. The  
35 confidential intervals were narrow, suggesting the precision of pooled results.[61] For  
36 adjusted data, most studies had full adjustment for confounders. The subtypes of  
37 non-insulin therapy, including oral drug and non-drug treatment, were analyzed  
38 separately. The between-study heterogeneity was intensively explored by sensitivity,  
39 subgroup, and meta-regression analyses. Besides, no publication bias was detected  
40 among the selected studies.  
41  
42  
43  
44  
45  
46  
47  
48

49 We were aware of the limitations of this meta-analysis. Our findings mainly  
50 relied on cross-sectional data; as such, the causal and temporal relationship between  
51 insulin use and depression could not be established. Some studies had a small sample  
52 size which may influence the statistical power. The response rate was only reported by  
53 several studies. The unmeasured differences between respondents and nonrespondents  
54  
55  
56  
57  
58  
59  
60

1  
2  
3 may potentially influence the pooled results. Most of the studies used self-reported  
4 scales rather than clinical interview-based assessments to identify depression.  
5  
6 Prevalence of depression was generally much higher using the self-reported scales  
7 than standardized diagnostic interviews.[20, 62] Furthermore, the findings of insulin  
8 therapy versus specific oral drugs and the prevalence of depression were not  
9 illustrated due to inclusion of less number of studies in each subset. Finally, the  
10 impact of the total number of daily insulin injections with depression development  
11 was included only in few studies, and these contributed as potential confounders in  
12 patients who received insulin therapy and the progression of depression.  
13  
14  
15  
16  
17  
18  
19  
20

## 21 **CONCLUSIONS**

22  
23 In conclusion, we provided solid evidence that type 2 diabetic patients who were  
24 prescribed insulin presented more depressive syndromes compared to those not using  
25 insulin. For insulin-users, careful monitoring of depressive symptoms should be  
26 incorporated into the disease management. Intensified psychological and education  
27 programs should be carried out to prevent depressive illness after insulin initiation in  
28 the primary care settings.  
29  
30  
31  
32  
33  
34  
35  
36  
37  
38  
39  
40  
41  
42  
43  
44  
45  
46  
47  
48  
49  
50  
51  
52  
53  
54  
55  
56  
57  
58  
59  
60

### **Acknowledgments**

None.

### **Funding**

This research received no specific grant from any funding agency in the public, commercial or not-for-profit sectors.

### **Conflict of interest**

The authors declare that they have no competing interests.

### **Authors' contributions**

XSB contributed to study concepts, manuscript preparation, literature research and drafting the manuscript. ZML, ZSL and DWY carried out literature research, data analysis and revising the manuscript for important content. All authors read and approved the final manuscript.

### **Data sharing statement**

No additional data available.

## References

- 1 Tabak AG, Akbaraly TN, Batty GD, et al. Depression and type 2 diabetes: a causal association? *Lancet Diabetes Endocrinol* 2014;2:236-45.
- 2 Type 2 Diabetes in Adults: Management. National Institute for Health and Care Excellence: Clinical Guidelines. London 2015.
- 3 Moulton CD, Pickup JC, Ismail K. The link between depression and diabetes: the search for shared mechanisms. *Lancet Diabetes Endocrinol* 2015;3:461-71.
- 4 Mezuk B, Eaton WW, Albrecht S, et al. Depression and type 2 diabetes over the lifespan: a meta-analysis. *Diabetes Care* 2008;31:2383-90.
- 5 Nouwen A, Winkley K, Twisk J, et al. Type 2 diabetes mellitus as a risk factor for the onset of depression: a systematic review and meta-analysis. *Diabetologia* 2010;53:2480-6.
- 6 van Dooren FE, Nefs G, Schram MT, et al. Depression and risk of mortality in people with diabetes mellitus: a systematic review and meta-analysis. *PLoS One* 2013;8:e57058.
- 7 Kan C, Silva N, Golden SH, et al. A systematic review and meta-analysis of the association between depression and insulin resistance. *Diabetes Care* 2013;36:480-9.
- 8 Ismail-Beigi F. Clinical practice. Glycemic management of type 2 diabetes mellitus. *N Engl J Med* 2012;366:1319-27.
- 9 Ohn JH, Kwak SH, Cho YM, et al. 10-year trajectory of beta-cell function and insulin sensitivity in the development of type 2 diabetes: a community-based prospective cohort study. *Lancet Diabetes Endocrinol* 2016;4:27-34.
- 10 Cahn A, Miccoli R, Dardano A, et al. New forms of insulin and insulin therapies for the treatment of type 2 diabetes. *Lancet Diabetes Endocrinol* 2015;3:638-52.
- 11 Home P, Riddle M, Cefalu WT, et al. Insulin therapy in people with type 2 diabetes: opportunities and challenges? *Diabetes Care* 2014;37:1499-508.
- 12 Weng J, Li Y, Xu W, et al. Effect of intensive insulin therapy on beta-cell function and glycaemic control in patients with newly diagnosed type 2 diabetes: a multicentre randomised parallel-group trial. *Lancet* 2008;371:1753-60.
- 13 Kramer CK, Zinman B, Retnakaran R. Short-term intensive insulin therapy in

1  
2  
3 type 2 diabetes mellitus: a systematic review and meta-analysis. *Lancet Diabetes*  
4 *Endocrinol* 2013;1:28-34.

6 14 Holman RR, Paul SK, Bethel MA, et al. 10-year follow-up of intensive glucose  
7 control in type 2 diabetes. *N Engl J Med* 2008;359:1577-89.

10 15 Holmes-Truscott E, Skinner TC, Pouwer F, et al. Explaining psychological  
11 insulin resistance in adults with non-insulin-treated type 2 diabetes: The roles of  
12 diabetes distress and current medication concerns. Results from Diabetes  
13 MILES-Australia. *Prim Care Diabetes* 2016;10:75-82.

16 16 Surwit RS, van Tilburg MA, Parekh PI, et al. Treatment regimen determines the  
17 relationship between depression and glycemic control. *Diabetes Res Clin Pract*  
18 2005;69:78-80.

21 17 Noh JH, Park JK, Lee HJ, et al. Depressive symptoms of type 2 diabetics treated  
22 with insulin compared to diabetics taking oral anti-diabetic drugs: a Korean study.  
23 *Diabetes Res Clin Pract* 2005;69:243-8.

26 18 Li C, Ford ES, Strine TW, et al. Prevalence of depression among U.S. adults with  
27 diabetes: findings from the 2006 behavioral risk factor surveillance system. *Diabetes*  
28 *Care* 2008;31:105-7.

31 19 Al-Amer RM, Sobeh MM, Zayed AA, et al. Depression among adults with  
32 diabetes in Jordan: risk factors and relationship to blood sugar control. *J Diabetes*  
33 *Complications* 2011;25:247-52.

36 20 Bell RA, Smith SL, Arcury TA, et al. Prevalence and correlates of depressive  
37 symptoms among rural older African Americans, Native Americans, and whites with  
38 diabetes. *Diabetes Care* 2005;28:823-9.

41 21 Katon W, von Korff M, Ciechanowski P, et al. Behavioral and clinical factors  
42 associated with depression among individuals with diabetes. *Diabetes Care*  
43 2004;27:914-20.

46 22 Mikailiukstiene A, Juozulynas A, Narkauskaite L, et al. Quality of life in relation  
47 to social and disease factors in patients with type 2 diabetes in Lithuania. *Med Sci*  
48 *Monit* 2013;19:165-74.

51 23 Stroup DF, Berlin JA, Morton SC, et al. Meta-analysis of observational studies in

1  
2  
3 epidemiology: a proposal for reporting. Meta-analysis Of Observational Studies in  
4 Epidemiology (MOOSE) group. *JAMA* 2000;283:2008-12.

5  
6  
7 24 Smarr KL, Keefer AL. Measures of depression and depressive symptoms: Beck  
8 Depression Inventory-II (BDI-II), Center for Epidemiologic Studies Depression Scale  
9 (CES-D), Geriatric Depression Scale (GDS), Hospital Anxiety and Depression Scale  
10 (HADS), and Patient Health Questionnaire-9 (PHQ-9). *Arthritis Care Res (Hoboken)*  
11 2011;63 Suppl 11:S454-66.

12  
13  
14  
15  
16 25 Organization WH. The ICD-10 classification of mental and behavioural disorders:  
17 clinical descriptions and diagnostic guidelines. Geneva: World Health Organization  
18 1992.

19  
20  
21 26 Association D-AP. Diagnostic and statistical manual of mental disorders.  
22 Arlington: American Psychiatric Publishing 2013.

23  
24  
25 27 Wells GA, Shea B, D OC. The Newcastle-Ottawa Scale (NOS) for assessing the  
26 quality of nonrandomised studies in meta-analyses.  
27 [http://www.ohrica/programs/clinical\\_epidemiology/oxfordasp](http://www.ohrica/programs/clinical_epidemiology/oxfordasp) (accessed April 27,  
28 29 2016) 2008.

30  
31  
32 28 Higgins JP, Thompson SG, Deeks JJ, et al. Measuring inconsistency in  
33 meta-analyses. *BMJ* 2003;327:557-60.

34  
35  
36 29 Begg CB, Mazumdar M. Operating characteristics of a rank correlation test for  
37 publication bias. *Biometrics* 1994;50:1088-101.

38  
39  
40 30 Egger M, Davey Smith G, Schneider M, et al. Bias in meta-analysis detected by a  
41 simple, graphical test. *BMJ* 1997;315:629-34.

42  
43  
44 31 Pawaskar MD, Anderson RT, Balkrishnan R. Self-reported predictors of  
45 depressive symptomatology in an elderly population with type 2 diabetes mellitus: a  
46 prospective cohort study. *Health Qual Life Outcomes* 2007;5:50.

47  
48  
49 32 Zhang W, Xu H, Zhao S, et al. Prevalence and influencing factors of co-morbid  
50 depression in patients with type 2 diabetes mellitus: a General Hospital based study.  
51 *Diabetol Metab Syndr* 2015;7:60.

52  
53  
54 33 Ali S, Davies MJ, Taub NA, et al. Prevalence of diagnosed depression in South  
55 Asian and white European people with type 1 and type 2 diabetes mellitus in a UK

1  
2  
3 secondary care population. *Postgrad Med J* 2009;85:238-43.  
4

5 34 Gorska-Ciebiada M, Saryusz-Wolska M, Ciebiada M, et al. Mild cognitive  
6 impairment and depressive symptoms in elderly patients with diabetes: prevalence,  
7 risk factors, and comorbidity. *J Diabetes Res* 2014;2014:179648.  
8  
9

10 35 Camara A, Balde NM, Enoru S, et al. Prevalence of anxiety and depression  
11 among diabetic African patients in Guinea: association with HbA1c levels. *Diabetes*  
12 *Metab* 2015;41:62-8.  
13  
14

15 36 Raval A, Dhanaraj E, Bhansali A, et al. Prevalence & determinants of depression  
16 in type 2 diabetes patients in a tertiary care centre. *Indian J Med Res*  
17 2010;132:195-200.  
18  
19

20 37 Roy T, Lloyd CE, Parvin M, et al. Prevalence of co-morbid depression in  
21 out-patients with type 2 diabetes mellitus in Bangladesh. *BMC Psychiatry*  
22 2012;12:123.  
23  
24

25 38 Jacob L, Kostev K. Prevalence of depression in type 2 diabetes patients in  
26 German primary care practices. *J Diabetes Complications* 2016;30:432-7.  
27  
28

29 39 Sun JC, Xu M, Lu JL, et al. Associations of depression with impaired glucose  
30 regulation, newly diagnosed diabetes and previously diagnosed diabetes in Chinese  
31 adults. *Diabet Med* 2015;32:935-43.  
32  
33

34 40 Hermanns N, Kulzer B, Krichbaum M, et al. How to screen for depression and  
35 emotional problems in patients with diabetes: comparison of screening characteristics  
36 of depression questionnaires, measurement of diabetes-specific emotional problems  
37 and standard clinical assessment. *Diabetologia* 2006;49:469-77.  
38  
39

40 41 Stankovic Z, Jasovic-Gasic M, Zamaklar M. Psycho-social and clinical variables  
41 associated with depression in patients with type 2 diabetes. *Psychiatr Danub*  
42 2011;23:34-44.  
43  
44

45 42 Zuberi SI, Syed EU, Bhatti JA. Association of depression with treatment  
46 outcomes in Type 2 Diabetes Mellitus: a cross-sectional study from Karachi, Pakistan.  
47 *BMC Psychiatry* 2011;11:27.  
48  
49

50 43 Lynch CP, Hernandez-Tejada MA, Strom JL, et al. Association between  
51 spirituality and depression in adults with type 2 diabetes. *Diabetes Educ*  
52  
53



1  
2  
3 2012;38:427-35.

4  
5 44 Osme SF, Ferreira L, Jorge MT, et al. Difference between the prevalence of  
6 symptoms of depression and anxiety in non-diabetic smokers and in patients with type  
7 2 diabetes with and without nicotine dependence. *Diabetol Metab Syndr* 2012;4:39.

8  
9  
10 45 Trento M, Raballo M, Trevisan M, et al. A cross-sectional survey of depression,  
11 anxiety, and cognitive function in patients with type 2 diabetes. *Acta Diabetol*  
12 2012;49:199-203.

13  
14  
15 46 Joseph N, Unnikrishnan B, Raghavendra Babu YP, et al. Proportion of depression  
16 and its determinants among type 2 diabetes mellitus patients in various tertiary care  
17 hospitals in Mangalore city of South India. *Indian J Endocrinol Metab*  
18 2013;17:681-8.

19  
20  
21 47 Hayashino Y, Mashitani T, Tsujii S, et al. Elevated Levels of hs-CRP Are  
22 Associated With High Prevalence of Depression in Japanese Patients With Type 2  
23 Diabetes: The Diabetes Distress and Care Registry at Tenri (DDCRT 6). *Diabetes*  
24 *Care* 2014;37:2459-65.

25  
26  
27 48 Sweileh WM, Abu-Hadeed HM, Al-Jabi SW, et al. Prevalence of depression  
28 among people with type 2 diabetes mellitus: a cross sectional study in Palestine. *BMC*  
29 *Public Health* 2014;14:163.

30  
31  
32 49 Kikuchi Y, Iwase M, Fujii H, et al. Association of severe hypoglycemia with  
33 depressive symptoms in patients with type 2 diabetes: the Fukuoka Diabetes Registry.  
34 *BMJ Open Diabetes Res Care* 2015;3:e000063.

35  
36  
37 50 Luca A, Luca M, Di Mauro M, et al. Alexithymia, more than depression,  
38 influences glycaemic control of type 2 diabetic patients. *J Endocrinol Invest*  
39 2015;38:653-60.

40  
41  
42 51 Rodríguez Calvín JL, Zapatero Gaviria A, Martín Ríos MD. Prevalence of  
43 depression in type 2 diabetes mellitus. *Revista Clínica Española (English Edition)*  
44 2015;215:156-64.

45  
46  
47 52 Zhang Y, Ting RZ, Yang W, et al. Depression in Chinese patients with type 2  
48 diabetes: associations with hyperglycemia, hypoglycemia, and poor treatment  
49 adherence. *J Diabetes* 2015;7:800-8.

- 1  
2  
3 53 Cols-Sagarra C, Lopez-Simarro F, Alonso-Fernandez M, et al. Prevalence of  
4 depression in patients with type 2 diabetes attended in primary care in Spain. *Prim*  
5 *Care Diabetes* 2016.  
6  
7  
8 54 Habtewold TD, Alemu SM, Haile YG. Sociodemographic, clinical, and  
9 psychosocial factors associated with depression among type 2 diabetic outpatients in  
10 Black Lion General Specialized Hospital, Addis Ababa, Ethiopia: a cross-sectional  
11 study. *BMC Psychiatry* 2016;16:103.  
12  
13  
14 55 Harris PA. The impact of age, gender, race, and ethnicity on the diagnosis and  
15 treatment of depression. *J Manag Care Pharm* 2004;10:S2-7.  
16  
17  
18 56 Skinner TC, Carey ME, Cradock S, et al. Depressive symptoms in the first year  
19 from diagnosis of Type 2 diabetes: results from the DESMOND trial. *Diabet Med*  
20 2010;27:965-7.  
21  
22  
23 57 Thoolen BJ, de Ridder DT, Bensing JM, et al. Psychological outcomes of patients  
24 with screen-detected type 2 diabetes: the influence of time since diagnosis and  
25 treatment intensity. *Diabetes Care* 2006;29:2257-62.  
26  
27  
28 58 Petrak F, Stridde E, Leverkus F, et al. Development and validation of a new  
29 measure to evaluate psychological resistance to insulin treatment. *Diabetes Care*  
30 2007;30:2199-204.  
31  
32  
33 59 Brod M, Kongso JH, Lessard S, et al. Psychological insulin resistance: patient  
34 beliefs and implications for diabetes management. *Qual Life Res* 2009;18:23-32.  
35  
36  
37 60 Polonsky WH, Hajos TR, Dain MP, et al. Are patients with type 2 diabetes  
38 reluctant to start insulin therapy? An examination of the scope and underpinnings of  
39 psychological insulin resistance in a large, international population. *Curr Med Res*  
40 *Opin* 2011;27:1169-74.  
41  
42  
43 61 Guyatt GH, Oxman AD, Kunz R, et al. GRADE guidelines 6. Rating the quality  
44 of evidence--imprecision. *J Clin Epidemiol* 2011;64:1283-93.  
45  
46  
47 62 Anderson RJ, Freedland KE, Clouse RE, et al. The prevalence of comorbid  
48 depression in adults with diabetes: a meta-analysis. *Diabetes Care* 2001;24:1069-78.  
49  
50  
51  
52  
53  
54  
55  
56  
57  
58  
59  
60

**Figure legends**

**Figure 1.** The selection process for eligible studies.

**Figure 2.** The pooled adjusted odds ratio for the risk of depression in insulin-prescribed patients compared with those without insulin therapy.

**Figure 3.** The pooled crude odds ratio for the risk of depression in insulin-prescribed patients compared with those without insulin therapy.

**Figure 4.** The funnel plot for the studies reporting adjusted odds ratios.

**Figure 5.** The funnel plot for the studies presenting crude odds ratios.

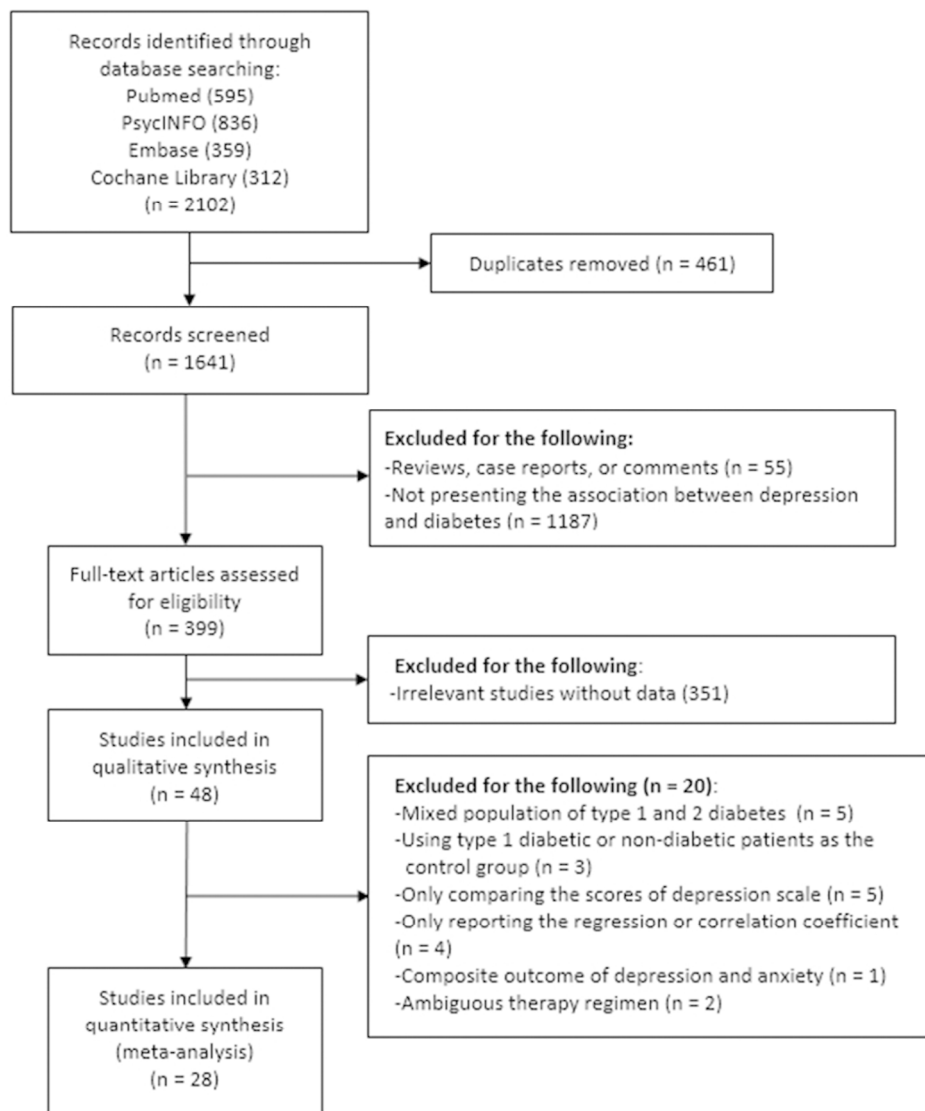

192x217mm (300 x 300 DPI)

1  
2  
3  
4  
5  
6  
7  
8  
9  
10  
11  
12  
13  
14  
15  
16  
17  
18  
19  
20  
21  
22  
23  
24  
25  
26  
27  
28  
29  
30  
31  
32  
33  
34  
35  
36  
37  
38  
39  
40  
41  
42  
43  
44  
45  
46  
47  
48  
49  
50  
51  
52  
53  
54  
55  
56  
57  
58  
59  
60

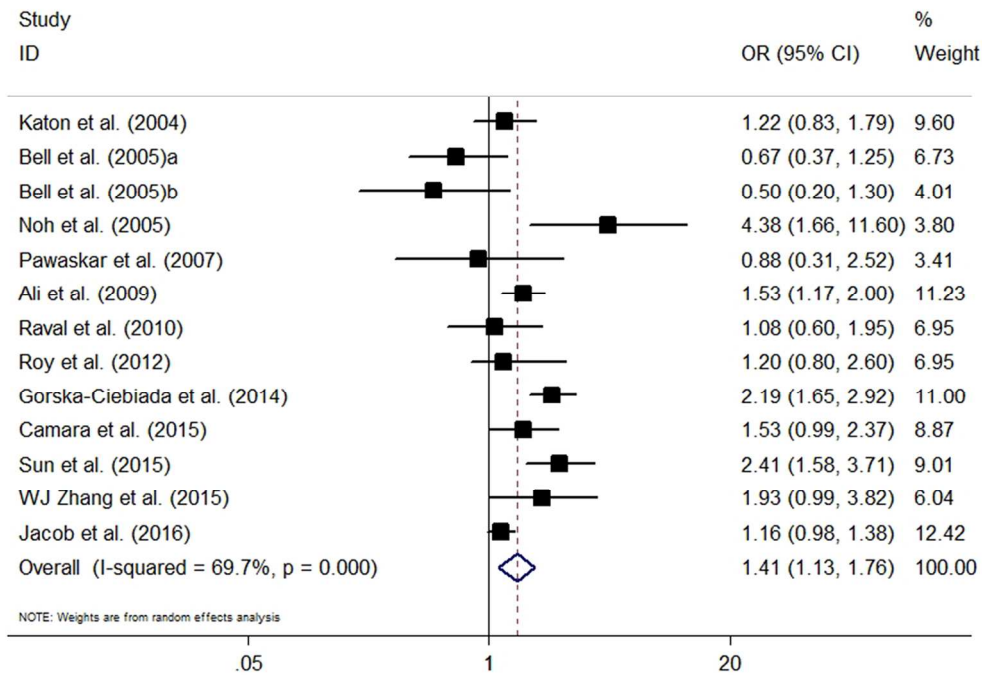

170x116mm (300 x 300 DPI)

View only

1  
2  
3  
4  
5  
6  
7  
8  
9  
10  
11  
12  
13  
14  
15  
16  
17  
18  
19  
20  
21  
22  
23  
24  
25  
26  
27  
28  
29  
30  
31  
32  
33  
34  
35  
36  
37  
38  
39  
40  
41  
42  
43  
44  
45  
46  
47  
48  
49  
50  
51  
52  
53  
54  
55  
56  
57  
58  
59  
60

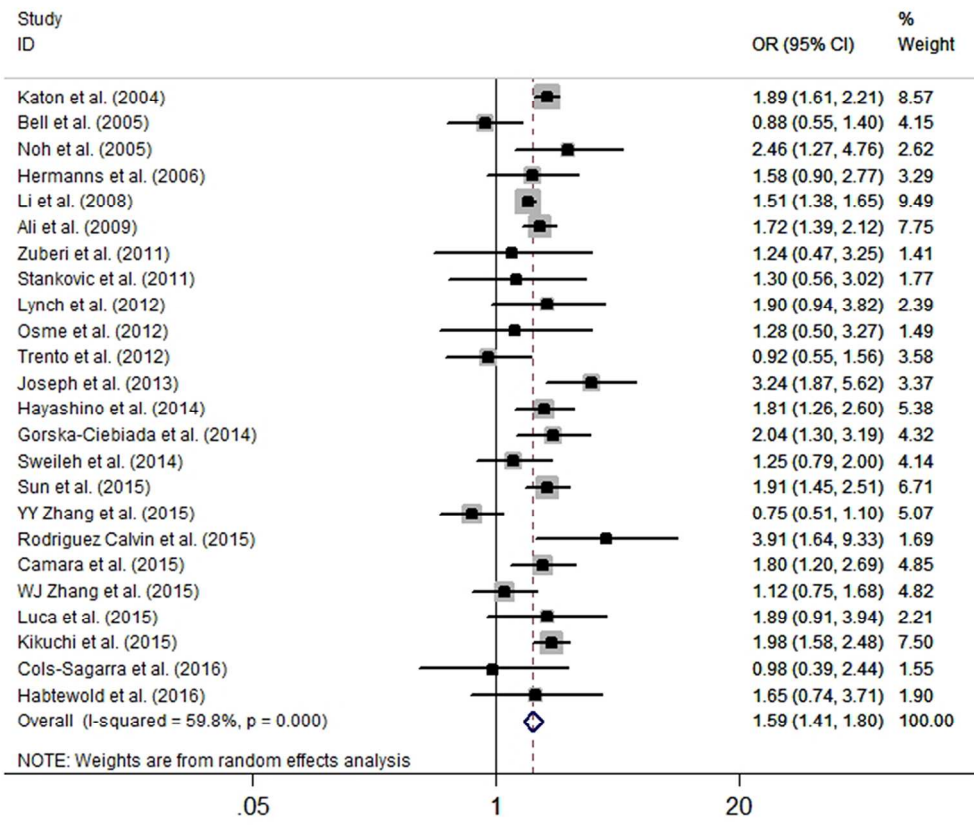

170x140mm (300 x 300 DPI)

1  
2  
3  
4  
5  
6  
7  
8  
9  
10  
11  
12  
13  
14  
15  
16  
17  
18  
19  
20  
21  
22  
23  
24  
25  
26  
27  
28  
29  
30  
31  
32  
33  
34  
35  
36  
37  
38  
39  
40  
41  
42  
43  
44  
45  
46  
47  
48  
49  
50  
51  
52  
53  
54  
55  
56  
57  
58  
59  
60

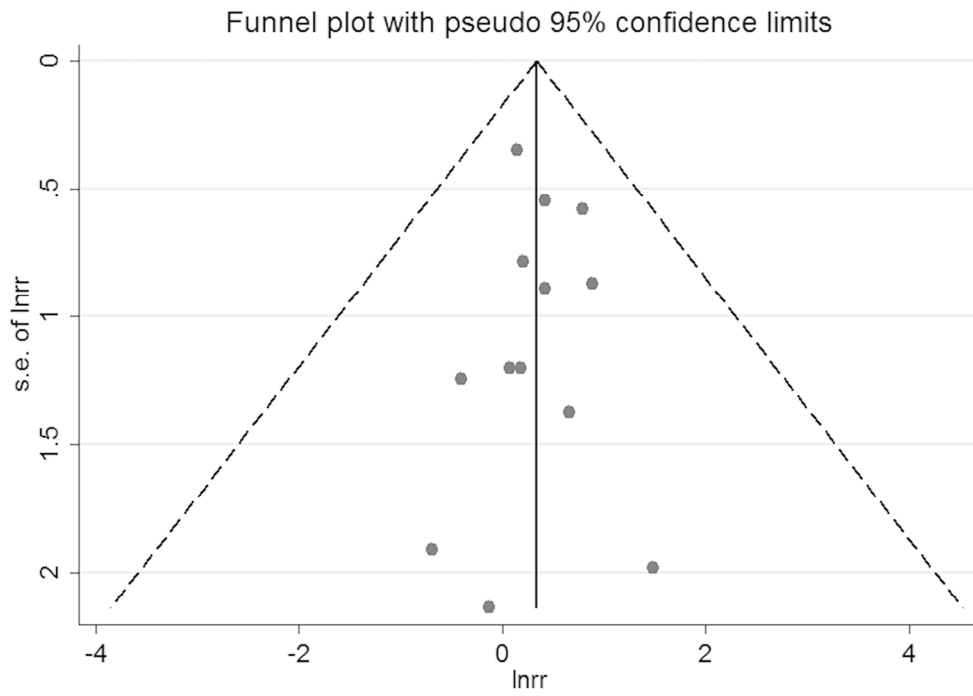

170x119mm (300 x 300 DPI)

new only

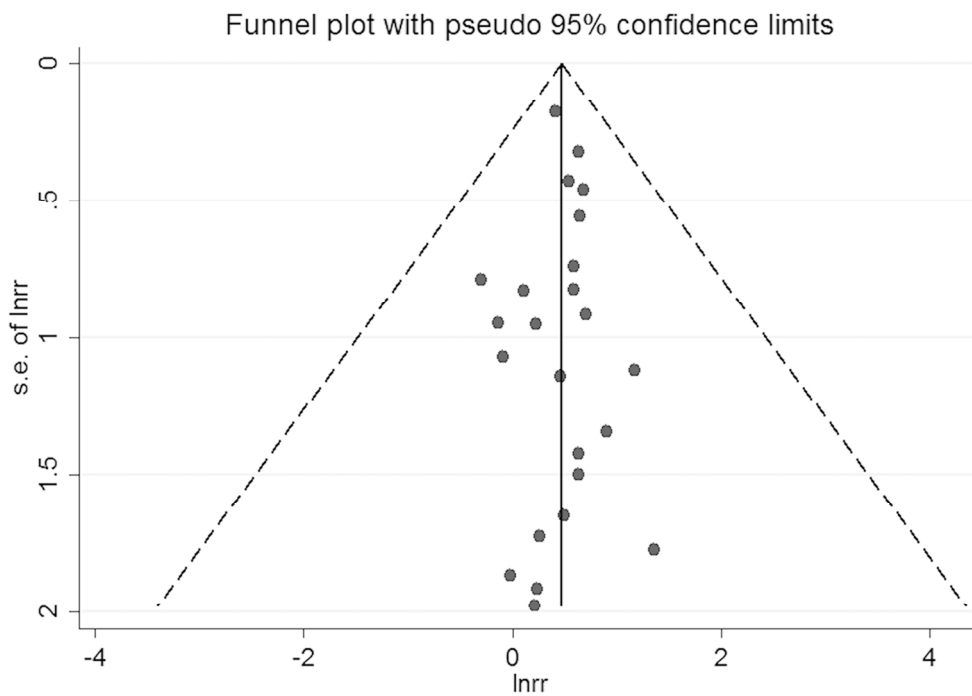

170x119mm (300 x 300 DPI)

new only



1  
2  
3  
4  
5  
6  
7  
8  
9  
10  
11  
12  
13  
14  
15  
16  
17  
18  
19  
20  
21  
22  
23  
24  
25  
26  
27  
28  
29  
30  
31  
32  
33  
34  
35  
36  
37  
38  
39  
40  
41  
42  
43  
44  
45  
46  
47  
48  
49  
50  
51  
52  
53  
54  
55  
56  
57  
58  
59  
60

Supplementary Figure S1. Sensitivity analysis for adjusted data

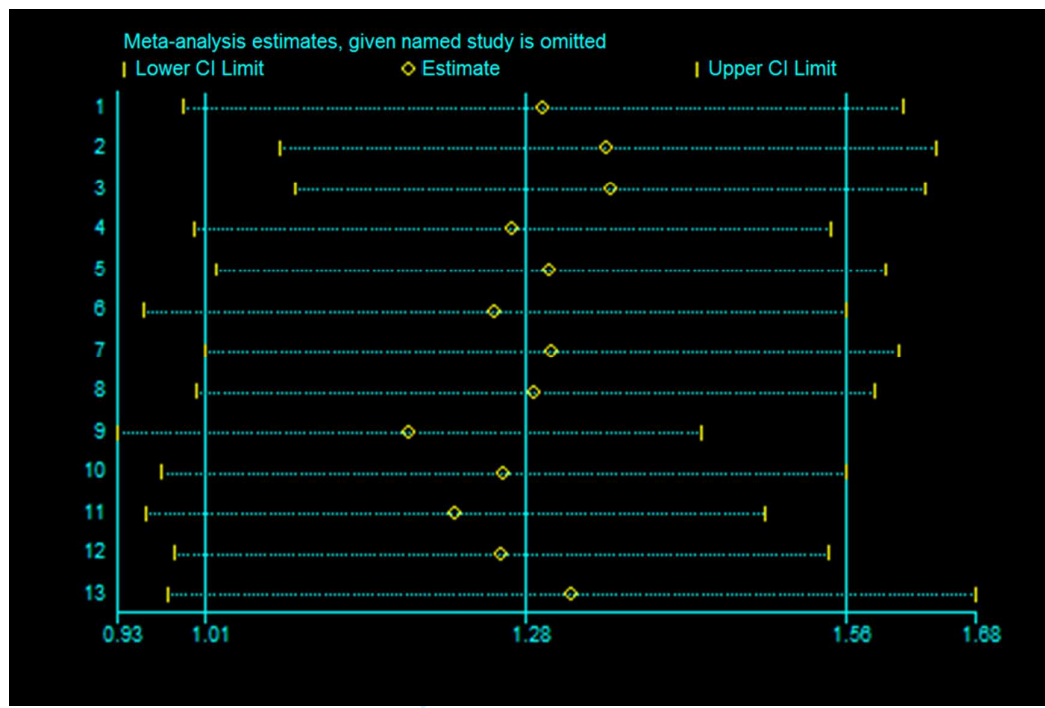

review only

Supplementary Figure S2. Sensitivity analysis for crude data

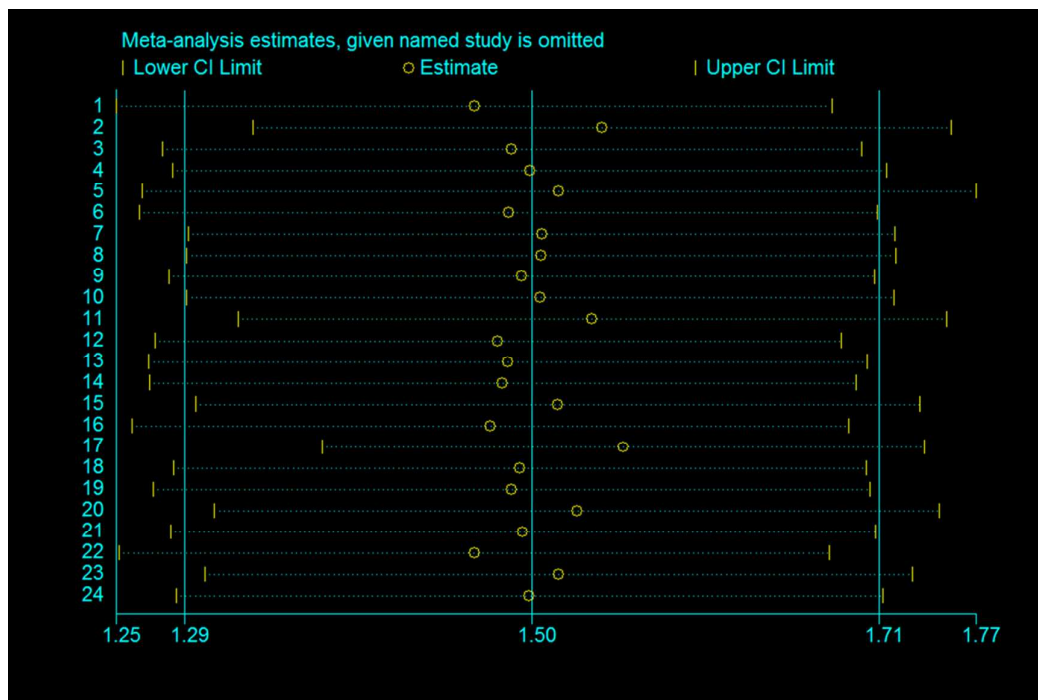

review only

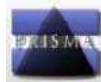

# PRISMA 2009 Checklist

| Section/topic                      | #  | Checklist item                                                                                                                                                                                                                                                                                              | Reported on page # |
|------------------------------------|----|-------------------------------------------------------------------------------------------------------------------------------------------------------------------------------------------------------------------------------------------------------------------------------------------------------------|--------------------|
| <b>TITLE</b>                       |    |                                                                                                                                                                                                                                                                                                             |                    |
| Title                              | 1  | Identify the report as a systematic review, meta-analysis, or both.                                                                                                                                                                                                                                         | 1                  |
| <b>ABSTRACT</b>                    |    |                                                                                                                                                                                                                                                                                                             |                    |
| Structured summary                 | 2  | Provide a structured summary including, as applicable: background; objectives; data sources; study eligibility criteria, participants, and interventions; study appraisal and synthesis methods; results; limitations; conclusions and implications of key findings; systematic review registration number. | 2                  |
| <b>INTRODUCTION</b>                |    |                                                                                                                                                                                                                                                                                                             |                    |
| Rationale                          | 3  | Describe the rationale for the review in the context of what is already known.                                                                                                                                                                                                                              | 4                  |
| Objectives                         | 4  | Provide an explicit statement of questions being addressed with reference to participants, interventions, comparisons, outcomes, and study design (PICOS).                                                                                                                                                  | 4                  |
| <b>METHODS</b>                     |    |                                                                                                                                                                                                                                                                                                             |                    |
| Protocol and registration          | 5  | Indicate if a review protocol exists, if and where it can be accessed (e.g., Web address), and, if available, provide registration information including registration number.                                                                                                                               |                    |
| Eligibility criteria               | 6  | Specify study characteristics (e.g., PICOS, length of follow-up) and report characteristics (e.g., years considered, language, publication status) used as criteria for eligibility, giving rationale.                                                                                                      | 5                  |
| Information sources                | 7  | Describe all information sources (e.g., databases with dates of coverage, contact with study authors to identify additional studies) in the search and date last searched.                                                                                                                                  | 5                  |
| Search                             | 8  | Present full electronic search strategy for at least one database, including any limits used, such that it could be repeated.                                                                                                                                                                               | 5                  |
| Study selection                    | 9  | State the process for selecting studies (i.e., screening, eligibility, included in systematic review, and, if applicable, included in the meta-analysis).                                                                                                                                                   | 5                  |
| Data collection process            | 10 | Describe method of data extraction from reports (e.g., piloted forms, independently, in duplicate) and any processes for obtaining and confirming data from investigators.                                                                                                                                  | 5-6                |
| Data items                         | 11 | List and define all variables for which data were sought (e.g., PICOS, funding sources) and any assumptions and simplifications made.                                                                                                                                                                       |                    |
| Risk of bias in individual studies | 12 | Describe methods used for assessing risk of bias of individual studies (including specification of whether this was done at the study or outcome level), and how this information is to be used in any data synthesis.                                                                                      | 6                  |
| Summary measures                   | 13 | State the principal summary measures (e.g., risk ratio, difference in means).                                                                                                                                                                                                                               | 6                  |
| Synthesis of results               | 14 | Describe the methods of handling data and combining results of studies, if done, including measures of consistency (e.g., $I^2$ ) for each meta-analysis.                                                                                                                                                   | 6                  |

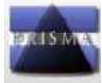

# PRISMA 2009 Checklist

Page 1 of 2

| Section/topic                 | #  | Checklist item                                                                                                                                                                                           | Reported on page # |
|-------------------------------|----|----------------------------------------------------------------------------------------------------------------------------------------------------------------------------------------------------------|--------------------|
| Risk of bias across studies   | 15 | Specify any assessment of risk of bias that may affect the cumulative evidence (e.g., publication bias, selective reporting within studies).                                                             | 7                  |
| Additional analyses           | 16 | Describe methods of additional analyses (e.g., sensitivity or subgroup analyses, meta-regression), if done, indicating which were pre-specified.                                                         |                    |
| <b>RESULTS</b>                |    |                                                                                                                                                                                                          |                    |
| Study selection               | 17 | Give numbers of studies screened, assessed for eligibility, and included in the review, with reasons for exclusions at each stage, ideally with a flow diagram.                                          | 7                  |
| Study characteristics         | 18 | For each study, present characteristics for which data were extracted (e.g., study size, PICOS, follow-up period) and provide the citations.                                                             | 7                  |
| Risk of bias within studies   | 19 | Present data on risk of bias of each study and, if available, any outcome level assessment (see item 12).                                                                                                | 22                 |
| Results of individual studies | 20 | For all outcomes considered (benefits or harms), present, for each study: (a) simple summary data for each intervention group (b) effect estimates and confidence intervals, ideally with a forest plot. |                    |
| Synthesis of results          | 21 | Present results of each meta-analysis done, including confidence intervals and measures of consistency.                                                                                                  | 19-22              |
| Risk of bias across studies   | 22 | Present results of any assessment of risk of bias across studies (see Item 15).                                                                                                                          | 22                 |
| Additional analysis           | 23 | Give results of additional analyses, if done (e.g., sensitivity or subgroup analyses, meta-regression [see Item 16]).                                                                                    |                    |
| <b>DISCUSSION</b>             |    |                                                                                                                                                                                                          |                    |
| Summary of evidence           | 24 | Summarize the main findings including the strength of evidence for each main outcome; consider their relevance to key groups (e.g., healthcare providers, users, and policy makers).                     | 22-24              |
| Limitations                   | 25 | Discuss limitations at study and outcome level (e.g., risk of bias), and at review-level (e.g., incomplete retrieval of identified research, reporting bias).                                            | 24-25              |
| Conclusions                   | 26 | Provide a general interpretation of the results in the context of other evidence, and implications for future research.                                                                                  | 25                 |
| <b>FUNDING</b>                |    |                                                                                                                                                                                                          |                    |
| Funding                       | 27 | Describe sources of funding for the systematic review and other support (e.g., supply of data); role of funders for the systematic review.                                                               | 26                 |

From: Moher D, Liberati A, Tetzlaff J, Altman DG, The PRISMA Group (2009). Preferred Reporting Items for Systematic Reviews and Meta-Analyses: The PRISMA Statement. PLoS Med 6(6): e1000097. doi:10.1371/journal.pmed1000097

For more information, visit: [www.prisma-statement.org](http://www.prisma-statement.org).

Page 2 of 2

For peer review only - <http://bmjopen.bmj.com/site/about/guidelines.xhtml>

# BMJ Open

## The association between insulin therapy and depression in patients with type 2 diabetes mellitus: a meta-analysis

|                                 |                                                                                                                                                                                                                                                                                                                                                        |
|---------------------------------|--------------------------------------------------------------------------------------------------------------------------------------------------------------------------------------------------------------------------------------------------------------------------------------------------------------------------------------------------------|
| Journal:                        | <i>BMJ Open</i>                                                                                                                                                                                                                                                                                                                                        |
| Manuscript ID                   | bmjopen-2017-020062.R1                                                                                                                                                                                                                                                                                                                                 |
| Article Type:                   | Research                                                                                                                                                                                                                                                                                                                                               |
| Date Submitted by the Author:   | 27-Jul-2018                                                                                                                                                                                                                                                                                                                                            |
| Complete List of Authors:       | Bai, Xiaosu; People's Hospital of Longhua New District, Department of Endocrinology<br>Liu, Zhiming; People's Hospital of Longhua New District, Department of Endocrinology<br>Li, Zhisen; People's Hospital of Longhua New District, Department of Endocrinology<br>Yan, Dewen; the Second People's Hospital of Shenzhen, Department of Endocrinology |
| <b>Primary Subject Heading</b>: | Diabetes and endocrinology                                                                                                                                                                                                                                                                                                                             |
| Secondary Subject Heading:      | Mental health, Diabetes and endocrinology                                                                                                                                                                                                                                                                                                              |
| Keywords:                       | Depression, insulin, type 2 diabetes mellitus, meta-analysis, risk factor                                                                                                                                                                                                                                                                              |
|                                 |                                                                                                                                                                                                                                                                                                                                                        |

SCHOLARONE™  
Manuscripts

View Only

1  
2  
3 **The association between insulin therapy and depression in patients with type 2**  
4 **diabetes mellitus: a meta-analysis**  
5  
6  
7  
8  
9

10 Xiaosu Bai<sup>1\*</sup>, Zhiming Liu<sup>1</sup>, Zhisen Li<sup>1</sup>, Dewen Yan<sup>2</sup>  
11

12 <sup>1</sup>Department of Endocrinology, People's Hospital of Longhua New District, Shenzhen,  
13 China  
14

15 <sup>2</sup>Department of Endocrinology, the Second People's Hospital of Shenzhen, Shenzhen,  
16 China  
17  
18  
19  
20  
21  
22  
23

24 **\*Corresponding author:**  
25

26 Xiaosu Bai  
27

28 Department of Endocrinology, People's Hospital of Longhua New District, No.38  
29 Jianshe Road, Shenzhen 518109, China  
30  
31  
32

33 Tel: +86-13925297135  
34

35 Email: bxslb@163.com  
36  
37  
38  
39  
40  
41

42 **Word count: 2791**  
43  
44  
45  
46  
47  
48  
49  
50  
51  
52  
53  
54  
55  
56  
57  
58  
59  
60

## Abstract

**Objectives:** A large number of type 2 diabetes mellitus (T2DM) patients had depressive disorders. Whether insulin treatment was associated with increased risk of depression remained controversial. We performed a meta-analysis to evaluate the association of insulin therapy and depression.

**Design:** A meta-analysis.

**Methods:** We conducted a systematic search of PubMed, PsycINFO, Embase and the Cochrane Library from their inception to April 2016. Epidemiological studies comparing the prevalence of depression between insulin users and non-insulin users were included. Random-effects models were used for meta-analysis. The adjusted and crude data were analyzed.

**Results:** Twenty-eight studies were included. Twelve studies presented adjusted ORs. Insulin therapy was significantly associated with an increased risk of depression (OR = 1.41, 95% CI 1.13-1.76, P = 0.003). Twenty-four studies were available for the crude data. Insulin therapy also associated with the odds for developing depression (OR = 1.59, 95% CI 1.41-1.80, P < 0.001). When comparing insulin therapy with oral-antidiabetic drugs, significant associations remained for adjusted (OR = 1.42, 95% CI 1.08-1.86, P = 0.008) and crude (OR = 1.61, 95% CI 1.35-1.93, P < 0.001) data.

**Conclusions:** Our meta-analysis confirmed that patients on insulin therapy was significantly associated with the risk of depressive symptoms.

**Keywords:** Depression; insulin; type 2 diabetes mellitus; meta-analysis; risk factor

### Strengths and limitations of this study

- The primary strength of this study was the systematic and expansive search of

1  
2  
3 multiple databases, which minimized the risk of missing data.  
4

5  
6 • Both of the adjusted and crude effect estimates were analyzed and demonstrated  
7 consistent results.  
8

9  
10 • Our findings mainly relied on cross-sectional data; as such, the causal and temporal  
11 relationship between insulin use and depression could not be established.  
12

13  
14 • Some studies had a small sample size which may influence the statistical power.  
15

16  
17 • The findings of insulin therapy versus specific oral drugs and the prevalence of  
18 depression were not illustrated due to inclusion of less number of studies in each  
19 subset.  
20  
21  
22  
23  
24  
25  
26  
27  
28  
29  
30  
31  
32  
33  
34  
35  
36  
37  
38  
39  
40  
41  
42  
43  
44  
45  
46  
47  
48  
49  
50  
51  
52  
53  
54  
55  
56  
57  
58  
59  
60



## INTRODUCTION

Diabetes and depression are major global public health problems, both of which are likely to be among the five leading causes of disease burden by 2030.[1] Approximately 90% of adults currently diagnosed with diabetes have type 2 diabetes (T2DM).[2] Recently, a bidirectional link between T2DM and depression has been recognized.[3] Meta-analysis showed that depression was associated with a 60% increased risk of T2DM.[4] Meanwhile, T2DM was associated with a 24% increased risk of depressive symptoms.[5] Further, depression adversely affected the prognosis and quality of life.[6, 7] Growing evidence showed that T2DM and depression may share similar lifestyle factors and biological origins.[3]

T2DM is a chronic and progressive disease characterized by insulin resistance and dysfunction of the pancreatic islet beta cells.[8, 9] For T2DM patients, insulin is the cornerstone of treatment for lowering glucose and HbA1c concentrations.[10] Although the optimal timing and indications for insulin therapy remained controversial,[11-13] most patients will inevitably require insulin therapy to attain adequate glycemic control in the natural history of T2DM.[11, 14]

However, insulin treatment seems less popular than oral hypoglycemic medications. Approximately 25% of the T2DM patients are reluctant to take insulin as the “last-resort” option.[15] Some patients may experience considerable psychological disorders with the transition from oral anti-diabetic drugs to insulin. Additionally, depressive symptoms was more commonly seen in patients with more frequent insulin injections per day.[16] However, the correlations between insulin use and the depression were inconsistent among the previous evidence. Several studies demonstrated positive correlation,[17-19] whereas other studies opposed.[20-22] Besides, these studies varied in enrolled population, adjustment of confounding factors, and depression assessment tools. Thus, we conducted a systematic review and meta-analysis to clarify the association between insulin therapy and the development of depression in T2DM patients.

## **METHODS**

### **Patient and Public Involvement**

Not applicable.

### **Search strategy**

This study was guided by the Meta-analysis of Observational Studies in Epidemiology guidelines.[23] We conducted a systematic computerized search of Pubmed, Ovid PsycINFO, Embase, and the Cochrane Library for eligible studies from their inception to April 2016. The following keywords and medical subject headings were combined: (depression OR depressive) AND (diabetes OR diabetic) AND insulin AND (cross-sectional OR population-based OR cohort OR prospective OR retrospective OR prevalence OR survey OR database OR trial). The language was restricted to English. We also manually screened the reference lists of selected studies for potentially relevant records.

### **Inclusion and exclusion criteria**

We included studies that: (1) investigated the development of depression in insulin users and non-insulin users (oral anti-diabetic drug, diet, or no treatment) among T2DM patients; (2) reported adjusted/unadjusted odds ratios (ORs) or risk ratios (RRs), or presented raw data which could produce crude effect estimates; (3) assessed depression by self-report measures or diagnostic interviews. The self-report scales including the Patient Health Questionnaire (PHQ), Beck Depression Inventory (BDI), and the Center for Epidemiologic Studies–Depression (CES-D) Scale.[24] The diagnostic interviews were based on the criteria by DSM or ICD.[25, 26] A threshold score was not defined as no consensus was available and the threshold varied in different clinical settings. Studies were excluded if: (1) T2DM was mixed with type 1 diabetes; (2) the comparison was conducted between T2DM and non-T2DM patients;

1  
2  
3 (3) depression could not be distinguished from anxiety or distress; (4) ORs or RRs  
4 could not be obtained or calculated. For example, we excluded studies only reporting  
5 mean and standard deviations of outcome measures.  
6  
7

### 8 9 **Data collection and quality assessment**

10  
11 Two reviewers independently screened titles and abstracts for eligible studies and  
12 extracted the data. Any disagreement was resolved by consensus. The following study  
13 characteristics were extracted: author, publication year, study design, country, sample  
14 size, mean or median age, proportion of males, depression diagnostic criteria,  
15 compared groups, and adjustment of effect estimates. Both of the unadjusted and  
16 adjusted effect estimates and 95% CIs were directly extracted or indirectly calculated.  
17 The degree of adjustment for confounders were categorized as: “+” for age and/or sex  
18 only; “++” for these further adjusted for more than 2 standard sociobehavioral risk  
19 factors (i.e., education, race, marital status, insurance, exercise, occupation, smoking  
20 status, alcohol consumption, family history of diabetes, and BMI); “+++” for these  
21 plus two or more clinical factors, including dyslipidemia, hypertension,  
22 cardiovascular disease, duration of T2DM, HbA1c level, treatment intensity, and  
23 diabetic complications. The quality was assessed by the modified Newcastle-Ottawa  
24 Scale (NOS).[27] This scale awarded a maximum of eight points to each study, with  
25 six or less points indicating a high risk of bias.  
26  
27  
28  
29  
30  
31  
32  
33  
34  
35  
36  
37  
38  
39

### 40 **Statistical analysis**

41  
42 As most included studies were cross-sectional, effect sizes had to be expressed as  
43 odds ratios (ORs). Given the low prevalence of depression in T2DM patients, the risk  
44 ratio (RR) reported by prospective study approximated the OR. Where available, the  
45 fully adjusted OR was pooled into meta-analysis to avoid the bias caused by  
46 confounding factors. However, the degree of adjustment and the variables entering  
47 into regression models varied between included studies. Thus, we additionally pooled  
48 the unadjusted ORs for data homogeneity. The random-effects model was used for  
49 meta-analysis. Heterogeneity was assessed by the Cochrane Q statistics and  $I^2$  values.  
50  
51  
52  
53  
54  
55  
56  
57

1  
2  
3 P < 0.05 was regarded as significant heterogeneity for the Q test. I<sup>2</sup> ranged between 0%  
4 (no heterogeneity) and 100% (high heterogeneity), with values around 25, 50, and 75%  
5 suggesting low, moderate, and high heterogeneity.[28] To weigh up the relative  
6 influence of each individual study, sensitivity analysis was performed by excluding  
7 one study at a time and assessing alteration in pooled results. Subgroup analyses and  
8 meta-regression analyses were performed using the following variables: compared  
9 groups (insulin vs. non-drug therapy or insulin vs. oral anti-diabetic drugs), degree of  
10 adjustment of confounders (+, ++ or +++), region (USA, Asia, Europe, or Africa),  
11 identification of depression (self-report questionnaire or medical records), sample size  
12 (≥ 1000 or < 1000), mean age (≥ 60 or < 60), percentage male (≥ 50 or < 50), and  
13 NOS scale (7/8, or <7). Publication bias was statistically assessed by Egger and Begg  
14 tests, with P < 0.05 indicating significant asymmetry.[29, 30] Also, we visually  
15 inspected the funnel plot for publication bias. All analyses were conducted by the  
16 Stata software (version 12.0; StataCorp, College Station, TX). A P value of less than  
17 0.05 was considered significant.

## 34 RESULTS

### 36 Study selection

37  
38  
39 We identified 595 articles from Pubmed, 836 articles from PsycINFO, 359 articles  
40 from Embase, and 312 articles from Cochrane Library, with a total of 2,102 records.  
41 We removed 461 duplicates. Further, 399 full-text articles were assessed for eligibility.  
42 After excluding 353 records with insufficient or irrelevant data, 46 studies were  
43 included into qualitative synthesis. We excluded 5 studies enrolling mixed type 1 and  
44 type 2 diabetic patients, 3 studies comparing depression between DM and non-DM  
45 patients, 4 studies only comparing the mean or median scores of depression  
46 questionnaire, 4 studies only reporting the regression or correlation coefficient, 1  
47 study presenting a mixed outcome of depression and anxiety, and 2 studies reporting a

1  
2  
3 mixed treatment regimen of insulin or oral drugs. Finally, 28 studies were included  
4 into meta-analysis. The flow diagram was shown in Figure 1.  
5  
6

### 7 **Study characteristics and quality assessment**

8  
9  
10 Among the 28 studies pooled into meta-analysis, except for 1 prospective cohort,[31]  
11 most were cross-sectional studies. A worldwide distribution was displayed, including  
12 5 studies of USA, 8 European studies, 10 Asian studies, 2 African studies, 1  
13 South-American study, and 1 study mixed of South-American and European  
14 population. The sample size ranged from 90 to 229 047. The prevalence of depression  
15 ranged from 3.4 to 51.1%. Seven studies reported both of the adjusted and unadjusted  
16 ORs,[17, 20, 21, 32-35] 5 studies only reported the adjusted ORs,[31, 36-39] and  
17 unadjusted ORs could only be retrieved from 16 studies.[18, 40-54] Descriptive data  
18 of the included studies were summarized in Table 1. In quality assessment, all studies  
19 had low to moderate risk of bias, with the scores ranging from 6 to 8. The items  
20 satisfied least were the control of confounding factors (12/28) and the report of  
21 response rates or follow-up data (10/28) (Table 2).  
22  
23  
24  
25  
26  
27  
28  
29  
30  
31  
32  
33  
34  
35  
36  
37  
38  
39  
40  
41  
42  
43  
44  
45  
46  
47  
48  
49  
50  
51  
52  
53  
54  
55  
56  
57  
58  
59  
60

1  
2  
3  
4  
5  
6  
7  
8  
9  
10  
11  
12  
13  
14  
15  
16  
17  
18  
19  
20  
21  
22  
23  
24  
25  
26  
27  
28  
29  
30  
31  
32  
33  
34  
35  
36  
37  
38  
39  
40  
41  
42  
43  
44  
45  
46  
47

**Table 1. Characteristics of included studies**

| Author (year)       | Design          | Study setting | No. of patients | Mean age, years | Country | Male, % | Depression prevalence, % | Depression assessment | Compared groups                                   | Source estimates | Adjusted factors                                                                                                                                                 |
|---------------------|-----------------|---------------|-----------------|-----------------|---------|---------|--------------------------|-----------------------|---------------------------------------------------|------------------|------------------------------------------------------------------------------------------------------------------------------------------------------------------|
| Katon et al. (2004) | Cross-sectional | Community     | 4193            | 65              | USA     | 51      | 20.5                     | PHQ-9                 | Insulin vs. non-drug                              | Adjusted         | Age, sex, education, marital status, employment, race, BMI and smoking, Rx Risk score, HbA1c, duration of diabetes, treatment intensity, number of complications |
| Bell et al. (2005)  | Cross-sectional | Community     | 696             | 74              | USA     | 50.7    | 15.8                     | CES-D                 | Insulin vs. oral medication; insulin vs. non-drug | Adjusted         | Age, sex, ethnicity, education, marital status, income, diabetes duration, number of medications, BMI, HbA1c, chronic conditions, PCS score                      |
| Noh et al.          | Hospital        | Hospital      | 204             | 53              | Korean  | 53      | 32.4                     | BDI                   | Insulin vs.                                       | Adjusted         | Age, sex, BMI, duration of                                                                                                                                       |

1  
2  
3  
4  
5  
6

(2005) l-based oral diabetes, HbA1c, occupation, medication education, marital status, family history of diabetes, hypertension, diabetic complications, cerebrovascular disease, IHD

Hermanns et al. Cross-sectional Hospital 236 52.2 Germany 60.6 33 BDI; Insulin vs. Unadjusted NA  
CES-D non-insulin

(2006) Pawaskar et al. Prospective cohort Medicare Health Maintenance Organization 792 72 USA 44 17.3 CES Insulin vs. Adjusted Age, sex, number of prescriptions, antidiabetic medication, perceived health status, health related quality of life, number of hospitalizations, ER visits  
sulfonyleurea

(2008) Li et al. Cross-sectional Surveillance Program 16651 ≥18 USA 42 14.4 PHQ Insulin vs. Unadjusted NA  
non-insulin

37  
38  
39  
40  
41  
42  
43  
44  
45  
46  
47

1  
2  
3  
4  
5  
6  
7  
8  
9  
10  
11  
12  
13  
14  
15  
16  
17  
18  
19  
20  
21  
22  
23  
24  
25  
26  
27  
28  
29  
30  
31  
32  
33  
34  
35  
36  
37  
38  
39  
40  
41  
42  
43  
44  
45  
46  
47

For peer review only

|                      |                 |          |      |      |                           |      |      |                 |                             |            |                                                                                                                                                                            |
|----------------------|-----------------|----------|------|------|---------------------------|------|------|-----------------|-----------------------------|------------|----------------------------------------------------------------------------------------------------------------------------------------------------------------------------|
| Ali et al. (2009)    | Cross-sectional | Hospital | 3845 | NA   | Mixed (South Asia and UK) | 52.8 | 9.3  | Medical records | Insulin vs. non-insulin     | Adjusted   | Age, gender, comorbidities, complications, insulin and oral anti-diabetic medication use, BMI, HbA1c, duration of diabetes, and deprivation                                |
| Raval et al. (2010)  | Cross-sectional | Hospital | 300  | 54   | India                     | 49   | 41   | PHQ-9           | Insulin vs. non-insulin     | Adjusted   | Age, gender, obesity, diabetic complications, blood pressure, duration of disease, income, education, BMI, HbA1c, diabetic complications, dyslipidemia, number of medicine |
| Zuberi et al. (2011) | Cross-sectional | Hospital | 286  | 52   | Pakistan                  | 39.2 | 50   | HADS            | Insulin vs. oral medication | Unadjusted | NA                                                                                                                                                                         |
| Stanković            | Cross-sectional | Hospital | 90   | 55.5 | Serbia                    | 34.4 | 51.1 | PHQ, BDI,       | Insulin vs.                 | Unadjusted | NA                                                                                                                                                                         |



1  
2  
3  
4  
5  
6  
7  
8  
9  
10  
11  
12  
13  
14  
15  
16  
17  
18  
19  
20  
21  
22  
23  
24  
25  
26  
27  
28  
29  
30  
31  
32  
33  
34  
35  
36  
37  
38  
39  
40  
41  
42  
43  
44  
45  
46  
47

|                |                 |                   |     |      |            |      |      |       |                                     |            |                                                                                               |  |
|----------------|-----------------|-------------------|-----|------|------------|------|------|-------|-------------------------------------|------------|-----------------------------------------------------------------------------------------------|--|
| et al.         | ectional        |                   |     |      |            |      |      |       | or interview                        | oral       |                                                                                               |  |
| (2011)         |                 |                   |     |      |            |      |      |       |                                     | medication |                                                                                               |  |
| Lynch et al.   | Cross-sectional | Hospital          | 201 | NA   | USA        | 27.4 | 19.9 | CES-D | Insulin vs. non-insulin             | Unadjusted | NA                                                                                            |  |
| (2012)         |                 |                   |     |      |            |      |      |       |                                     |            |                                                                                               |  |
| Osme et al.    | Cross-sectional | Outpatient clinic | 138 | ≥30  | Brazil     | 27.5 | 44.6 | HAD   | Insulin vs. non-insulin             | Unadjusted | NA                                                                                            |  |
| (2012)         |                 |                   |     |      |            |      |      |       |                                     |            |                                                                                               |  |
| Taranto et al. | Cross-sectional | Outpatient clinic | 498 | 67.6 | Italy      | 52.6 | 14.2 | ZSDS  | Insulin vs. non-insulin             | Unadjusted | NA                                                                                            |  |
| (2012)         |                 |                   |     |      |            |      |      |       |                                     |            |                                                                                               |  |
| Roy et al.     | Cross-sectional | Outpatient clinic | 417 | 53.2 | Bangladesh | 50.6 | 34   | PHQ-9 | Insulin vs. oral medication + diet; | Adjusted   | Age, gender, education, income, region, CVD, hypertension, diabetic complications, BMI, HbA1c |  |
| (2012)         |                 |                   |     |      |            |      |      |       |                                     |            |                                                                                               |  |

1  
2  
3  
4  
5  
6  
7  
8  
9  
10  
11  
12  
13  
14  
15  
16  
17  
18  
19  
20  
21  
22  
23  
24  
25  
26  
27  
28  
29  
30  
31  
32  
33  
34  
35  
36  
37  
38  
39  
40  
41  
42  
43  
44  
45  
46  
47

For peer review only

insulin+oral  
medication  
vs. oral  
medication  
+diet

Joseph et al (2013) Cross-sectional Hospital 230 53.6 India 51.7 45.2 PHQ-9 Insulin vs. Unadjusted NA

oral  
medication

Hayashino et al. (2014) Cross-sectional Hospital 3573 66 Japan 61.1 3.4 PHQ-9 Insulin vs. Unadjusted NA

oral  
medication  
or diet

Gorska-Ciechanowska et al. (2014) Cross-sectional Outpatient clinic 276 74 Poland 46 29.7 GDS Insulin vs. Adjusted Age, sex, education,

oral  
medication

marital status, smoking, physical activity, duration

1  
2  
3  
4  
5  
6  
7  
8  
9  
10  
11  
12  
13  
14  
15  
16  
17  
18  
19  
20  
21  
22  
23  
24  
25  
26  
27  
28  
29  
30  
31  
32  
33  
34  
35  
36  
37  
38  
39  
40  
41  
42  
43  
44  
45  
46  
47

For peer review only

of diabetes, BMI, HbA1c, lipids  
levels, diabetic complications,  
previous HA or use of HA drugs,  
hyperlipidemia, number of  
comorbid conditions, hypoglycemia

|                                  |                 |            |      |      |           |      |      |       |                             |            |                                                              |
|----------------------------------|-----------------|------------|------|------|-----------|------|------|-------|-----------------------------|------------|--------------------------------------------------------------|
| Sweileh et al. (2014)            | Cross-sectional | Hospital   | 294  | 60   | Palestine | 44.2 | 40.2 | BDI   | Insulin vs. non-insulin     | Unadjusted | NA                                                           |
| Yan Zhang et al. (2015)          | Cross-sectional | Hospital   | 2538 | 56.4 | China     | 53   | 6.1  | PHQ-9 | Insulin vs. oral drugs      | Unadjusted | NA                                                           |
| Rodríguez-Carvalín et al. (2015) | Cross-sectional | Hospital   | 275  | 64.5 | Spain     | 56.4 | 32.7 | BDI   | Insulin vs. oral medication | Unadjusted | NA                                                           |
| Camara et al.                    | Cross-sectional | Outpatient | 491  | 58   | Guinea    | 37   | 34.4 | HADS  | Insulin vs. oral            | Adjusted   | Age, HbA1c, hypertension, BMI, residence zone, socioeconomic |

1  
2  
3  
4  
5  
6  
7  
8  
9  
10  
11  
12  
13  
14  
15  
16  
17  
18  
19  
20  
21  
22  
23  
24  
25  
26  
27  
28  
29  
30  
31  
32  
33  
34  
35  
36  
37  
38  
39  
40  
41  
42  
43  
44  
45  
46  
47

For peer review only

|                    |                 |           |     |      |       |      |      |       |                        |                         |  |                                                                                                                                                                                |
|--------------------|-----------------|-----------|-----|------|-------|------|------|-------|------------------------|-------------------------|--|--------------------------------------------------------------------------------------------------------------------------------------------------------------------------------|
| al (2015)          | ectional        | clinic    |     |      |       |      |      |       |                        | medication              |  | status                                                                                                                                                                         |
| Sun et al. (2015)  | Cross-sectional | Community | 229 | 57.4 | China | 34.4 | 5.9  | PHQ-9 | Insulin vs. Adjusted   | oral medication or diet |  | Age, sex, BMI, HbA1c, smoking, alcohol, physical activity, education, occupation, marital status, selfreport cardio-metabolic disorders, diabetes treatment, diabetes duration |
| Wang et al. (2015) | Cross-sectional | Hospital  | 412 | 59.8 | China | 50.2 | 5.7  | BDI   | Insulin vs. Adjusted   | oral medication         |  | Age, gender, education, marital status, occupation, insurance, HbA1c, BMI, DM history, diabetic complications, duration of DM, smoking, alcohol, exercise, sleeping hours      |
| Li et al. (2015)   | Cross-sectional | Hospital  | 128 | 64.7 | Italy | 58.6 | 50.8 | HAM-D | Insulin vs. Unadjusted | oral medication         |  | NA                                                                                                                                                                             |

1  
2  
3  
4  
5  
6  
7  
8  
9  
10  
11  
12  
13  
14  
15  
16  
17  
18  
19  
20  
21  
22  
23  
24  
25  
26  
27  
28  
29  
30  
31  
32  
33  
34  
35  
36  
37  
38  
39  
40  
41  
42  
43  
44  
45  
46  
47

For peer review only

or diet

|                          |                 |           |       |      |          |      |      |                 |                              |            |                                                            |
|--------------------------|-----------------|-----------|-------|------|----------|------|------|-----------------|------------------------------|------------|------------------------------------------------------------|
| Kikuchi et al. (2015)    | Cross-sectional | Community | 4218  | 65.5 | Japan    | 57.1 | 10.6 | CES-D           | Insulin vs. non-insulin      | Unadjusted | NA                                                         |
| Jacob et al. (2016)      | Cross-sectional | Community | 90412 | 65.5 | Germany  | 50.2 | 30.3 | Medical records | Insulin vs. non-insulin      | Adjusted   | Age, gender, insurance, diabetic complications, CVD, HbA1c |
| Cois-Sagar et al. (2016) | Cross-sectional | Community | 411   | 70.8 | Spain    | 46.2 | 29.2 | PHQ-9           | Insulin vs. oral medications | Unadjusted | NA                                                         |
| Habtewold et al. (2016)  | Cross-sectional | Hospital  | 276   | 44   | Ethiopia | 47   | 44.7 | PHQ-9           | Insulin vs. oral medication  | Unadjusted | NA                                                         |

BDI, Beck Depression Inventory; BMI, body mass index; BG, blood glucose; CES-D, Center for Epidemiologic Studies Depression; DBP, diastolic blood pressure; ER, emergency room; GDS, Geriatric Depression Scale; HADS, Hospital Anxiety and Depression Scale; HAM-D, Hamilton rating scale for depression; IHD, ischemic heart disease; PCS, Physical Component Summary score; PHQ, Patient Health

1  
2  
3  
4  
5  
6  
7  
8  
9  
10  
11  
12  
13  
14  
15  
16  
17  
18  
19  
20  
21  
22  
23  
24  
25  
26  
27  
28  
29  
30  
31  
32  
33  
34  
35  
36  
37  
38  
39  
40  
41  
42  
43  
44  
45  
46  
47

Questionnaire; SBP, systolic blood pressure; ZSDS, Zung Self-Rating Depression Scale.

For peer review only

**Table 2. Quality assessment of included studies by the modified Newcastle-Ottawa scale (NOS)**

| Author (year)          | Adequate definition of cases using insulin | Representativeness of cases using insulin | Selection of the non-insulin users | Ascertainment of insulin use | Depression was not present before initiation | Control of confounding factors | Assessment of depression | Report response or follow-up data | Total score |
|------------------------|--------------------------------------------|-------------------------------------------|------------------------------------|------------------------------|----------------------------------------------|--------------------------------|--------------------------|-----------------------------------|-------------|
| Katon et al. (2004)    | 1                                          | 1                                         | 1                                  | 1                            | 1                                            | 1                              | 1                        | 1                                 | 8           |
| Bell et al. (2005)     | 1                                          | 1                                         | 1                                  | 1                            | 1                                            | 1                              | 1                        | 0                                 | 7           |
| Noh et al. (2005)      | 1                                          | 0                                         | 1                                  | 1                            | 1                                            | 1                              | 1                        | 0                                 | 6           |
| Hermanns et al. (2006) | 1                                          | 1                                         | 1                                  | 1                            | 1                                            | 0                              | 1                        | 0                                 | 6           |
| Pawaskar et al. (2007) | 1                                          | 1                                         | 1                                  | 1                            | 1                                            | 1                              | 1                        | 1                                 | 7           |
| Li et al. (2008)       | 1                                          | 1                                         | 1                                  | 1                            | 1                                            | 0                              | 1                        | 0                                 | 6           |
| Ali et al. (2009)      | 1                                          | 1                                         | 1                                  | 1                            | 1                                            | 1                              | 1                        | 0                                 | 7           |
| Raval et al. (2010)    | 1                                          | 1                                         | 1                                  | 1                            | 1                                            | 1                              | 1                        | 0                                 | 7           |

1  
2  
3  
4  
5  
6

---

|    |                                |   |   |   |   |   |   |   |   |   |
|----|--------------------------------|---|---|---|---|---|---|---|---|---|
| 7  | Zuberi et al. (2011)           | 1 | 1 | 1 | 1 | 1 | 0 | 1 | 1 | 7 |
| 8  |                                |   |   |   |   |   |   |   |   |   |
| 9  | Stanković et al. (2011)        | 1 | 1 | 1 | 1 | 1 | 0 | 1 | 0 | 6 |
| 10 |                                |   |   |   |   |   |   |   |   |   |
| 11 |                                |   |   |   |   |   |   |   |   |   |
| 12 | Lynch et al. (2012)            | 1 | 1 | 1 | 1 | 1 | 0 | 1 | 1 | 7 |
| 13 |                                |   |   |   |   |   |   |   |   |   |
| 14 |                                |   |   |   |   |   |   |   |   |   |
| 15 | Osme et al. (2012)             | 1 | 1 | 1 | 1 | 1 | 0 | 1 | 0 | 6 |
| 16 |                                |   |   |   |   |   |   |   |   |   |
| 17 | Trento et al. (2012)           | 1 | 1 | 1 | 1 | 1 | 0 | 1 | 0 | 6 |
| 18 |                                |   |   |   |   |   |   |   |   |   |
| 19 |                                |   |   |   |   |   |   |   |   |   |
| 20 | Roy et al. (2012)              | 1 | 1 | 1 | 1 | 1 | 1 | 1 | 1 | 8 |
| 21 |                                |   |   |   |   |   |   |   |   |   |
| 22 |                                |   |   |   |   |   |   |   |   |   |
| 23 | Joseph et al. (2013)           | 1 | 1 | 1 | 1 | 1 | 0 | 1 | 0 | 6 |
| 24 |                                |   |   |   |   |   |   |   |   |   |
| 25 | Hayashino et al. (2014)        | 1 | 1 | 1 | 1 | 1 | 0 | 1 | 0 | 6 |
| 26 |                                |   |   |   |   |   |   |   |   |   |
| 27 |                                |   |   |   |   |   |   |   |   |   |
| 28 | Gorska-Ciebiada et al. (2014)  | 0 | 1 | 1 | 1 | 1 | 1 | 1 | 0 | 6 |
| 29 |                                |   |   |   |   |   |   |   |   |   |
| 30 |                                |   |   |   |   |   |   |   |   |   |
| 31 | Sweileh et al. (2014)          | 1 | 1 | 1 | 1 | 1 | 0 | 1 | 1 | 7 |
| 32 |                                |   |   |   |   |   |   |   |   |   |
| 33 | YY Zhang et al. (2015)         | 1 | 1 | 1 | 1 | 1 | 0 | 1 | 1 | 7 |
| 34 |                                |   |   |   |   |   |   |   |   |   |
| 35 |                                |   |   |   |   |   |   |   |   |   |
| 36 | Rodriguez Calvin et al. (2015) | 1 | 1 | 1 | 1 | 1 | 0 | 1 | 1 | 7 |
| 37 |                                |   |   |   |   |   |   |   |   |   |

---

38  
39  
40  
41  
42  
43  
44  
45  
46  
47

For peer review only



1  
2  
3  
4  
5  
6  
7  
8  
9  
10  
11  
12  
13  
14  
15  
16  
17  
18  
19  
20  
21  
22  
23  
24  
25  
26  
27  
28  
29  
30  
31  
32  
33  
34  
35  
36  
37  
38  
39  
40  
41  
42  
43  
44  
45  
46  
47

For peer review only

---

|    |                            |   |   |   |   |   |   |   |   |   |
|----|----------------------------|---|---|---|---|---|---|---|---|---|
| 7  | Camara et al. (2015)       | 1 | 1 | 1 | 1 | 1 | 0 | 1 | 0 | 6 |
| 9  | Sun et al. (2015)          | 1 | 1 | 1 | 1 | 1 | 1 | 1 | 0 | 7 |
| 12 | WJ Zhang et al. (2015)     | 1 | 1 | 1 | 1 | 1 | 1 | 1 | 1 | 8 |
| 15 | Luca et al. (2015)         | 1 | 1 | 1 | 1 | 1 | 0 | 1 | 0 | 6 |
| 17 | Kikuchi et al. (2015)      | 1 | 1 | 1 | 1 | 1 | 0 | 1 | 0 | 6 |
| 20 | Jacob et al. (2016)        | 1 | 1 | 1 | 1 | 1 | 0 | 1 | 0 | 6 |
| 22 | Cols-Sagarra et al. (2016) | 1 | 1 | 1 | 1 | 1 | 0 | 1 | 0 | 6 |
| 25 | Habtewold et al. (2016)    | 1 | 1 | 1 | 1 | 1 | 0 | 1 | 1 | 7 |

---

### Meta-analysis of adjusted data

The adjusted ORs for the comparison of depression between insulin and non-insulin treated patients were reported by 12 studies. Compared with non-insulin treatment, insulin therapy was associated with a statistically significant higher risk of depression (OR = 1.41, 95% CI 1.13-1.76, P = 0.003). Significantly high heterogeneity was revealed ( $I^2 = 69.7\%$ ,  $P < 0.001$ ) (Figure 2).

The results of sensitivity analysis, which excluded the selected studies one by one, might vary by excluding several included studies (Supplementary Figure S1). To identify the sources of heterogeneity, we performed subgroup analyses based on several important confounding factors. Six studies particularly compared insulin with oral anti-diabetic drugs, and showed that insulin therapy was significantly associated with increased risk of depression (OR = 1.42, 95% CI 1.08-1.86, P = 0.008). For 2 studies comparing insulin with non-drug therapy, no significant association was revealed for insulin and depression (OR = 0.87, 95% CI 0.37-2.03, P = .745). Additionally, we conducted a subgroup analysis based on the degree of adjustment of confounders, region, identification of depression, sample size, mean age, percentage male, and NOS scale. The association remained significant for the subgroups of fully adjustment (+++), Asian studies, self-report questionnaires, sample size  $\geq 1000$ , mean age  $< 60.0$  years, percentage of male  $< 50.0\%$ , prevalence of depression over 20%, and NOS scale  $< 6$  (Table 3). Meta-regression analyses indicated a lack of effect measure modification by sample size (P = 0.93), mean age (P = 0.17), percentage male (P = 0.28) or prevalence of depression (P = 0.75).

**Table 3. Subgroup analyses for the studies reporting adjusted effect estimates**

| Subgroups              | No. of studies | OR (95% CI) | P value | $I^2$ | P value for heterogeneity | P value between subgroups |
|------------------------|----------------|-------------|---------|-------|---------------------------|---------------------------|
| <b>Compared groups</b> |                |             |         |       |                           |                           |

|                                     |    |                  |       |       |       |      |
|-------------------------------------|----|------------------|-------|-------|-------|------|
| Insulin vs. oral drugs              | 6  | 1.42 (1.08-1.86) | <0.05 | 71.3% | <0.05 | 0.28 |
| Insulin vs. non-drugs               | 2  | 0.87 (0.37-2.03) | >0.05 | 66.5% | 0.08  |      |
| <b>Degree of adjustment</b>         |    |                  |       |       |       |      |
| +++                                 | 10 | 1.43 (1.08-1.89) | <0.05 | 68.9% | <0.05 | 0.44 |
| ++                                  | 2  | 1.24 (0.98-1.55) | >0.05 | 25.3% | 0.25  |      |
| <b>Region</b>                       |    |                  |       |       |       |      |
| USA                                 | 4  | 0.86 (0.57-1.31) | >0.05 | 36.4% | 0.19  | 0.12 |
| Asia                                | 5  | 1.81 (1.18-2.79) | <0.05 | 59%   | 0.05  |      |
| Europe                              | 2  | 1.58 (0.85-2.94) | >0.05 | 92.9% | <0.05 |      |
| Africa                              | 1  | 1.53 (0.99-2.37) | >0.05 | -     | -     |      |
| <b>Identification of depression</b> |    |                  |       |       |       |      |
| Self-report questionnaire           | 10 | 1.42 (1.06-1.91) | <0.05 | 68.9% | <0.05 | 0.69 |
| Medical records                     | 2  | 1.31 (1.00-1.71) | >0.05 | 65.6% | 0.09  |      |
| <b>Sample size</b>                  |    |                  |       |       |       |      |
| ≥ 1000                              | 4  | 1.46 (1.10-1.94) | <0.05 | 73.1% | <0.05 | 0.72 |
| < 1000                              | 8  | 1.34 (0.93-1.93) | >0.05 | 70%   | <0.05 |      |
| <b>Mean age</b>                     |    |                  |       |       |       |      |
| ≥ 60.0                              | 5  | 1.12 (0.77-1.62) | >0.05 | 78.8% | <0.05 | 0.08 |

|                                 |   |                  |       |       |       |      |
|---------------------------------|---|------------------|-------|-------|-------|------|
| < 60.0                          | 6 | 1.74 (1.24-2.43) | <0.05 | 50.8% | 0.07  |      |
| <b>Percentage male (%)</b>      |   |                  |       |       |       |      |
| ≥ 50.0                          | 7 | 1.26 (0.97-1.63) | >0.05 | 62.4% | <0.05 | 0.14 |
| < 50.0                          | 5 | 1.71 (1.25-2.35) | <0.05 | 53.9% | 0.07  |      |
| <b>Prevalence of depression</b> |   |                  |       |       |       |      |
| ≥ 20%                           | 7 | 1.48 (1.12-1.96) | <0.05 | 71.3% | <0.05 | 0.53 |
| < 20%                           | 5 | 1.25 (0.80-1.95) | >0.05 | 72.7% | <0.05 |      |
| <b>NOS scale</b>                |   |                  |       |       |       |      |
| 7 or 8                          | 8 | 1.25 (0.94-1.66) | >0.05 | 60.0% | <0.05 | 0.19 |
| <7                              | 4 | 1.79 (1.14-2.80) | <0.05 | 84.6% | <0.05 |      |

### Meta-analysis of unadjusted results

Twenty-four studies were available for the crude data. All studies were cross-sectional, and assessed depression by self-report scales. The studies presented three comparison types (insulin vs. non-drug therapy; insulin vs. oral anti-diabetic drugs; and insulin vs. non-insulin treatment). Data on the comparison between insulin and non-insulin therapy were preferred. The pooled results showed that T2DM patients on insulin therapy were associated with an increased risk of depression compared with those on non-insulin treatment (OR = 1.59, 95% CI 1.41-1.80, P < 0.001) (Figure 3). The heterogeneity was at a significantly high level ( $I^2 = 59.8\%$ , P < 0.001). Sensitivity analysis revealed no significant variation in the pooled OR by exclusion of any included study (Supplementary Figure S2).

Seventeen studies compared insulin with oral anti-diabetic drugs, showing a significantly association for the risk of depression (OR = 1.61, 95% CI 1.35-1.93,  $P < 0.001$ ). For 6 studies comparing insulin use with non-drug treatment, we noted insulin use was associated with an increased risk of depression (OR = 1.89, 95% CI 1.25-2.88,  $P = 0.002$ ). In the stratified analyses based on degree of adjustment of confounders, region, identification of depression, sample size, mean age, percentage male, and NOS scale, the significant association between insulin use and depression remained significant among all subgroups except the study conducted in South America (Table 4). In meta-regression analyses, sample size ( $P = 0.79$ ), mean age ( $P = 0.56$ ), percentage male ( $P = 0.80$ ), and the prevalence of depression ( $P = 0.68$ ) demonstrated no independent effect on the depression outcomes.

**Table 4. Subgroup analyses for the studies reporting the crude effect estimates**

| Subgroups              | No. of studies | OR (95% CI)      | P value | I <sup>2</sup> (P value) | P value for heterogeneity | P value between subgroups |
|------------------------|----------------|------------------|---------|--------------------------|---------------------------|---------------------------|
| <b>Compared groups</b> |                |                  |         |                          |                           |                           |
| Insulin vs. oral drugs | 17             | 1.61 (1.35-1.93) | <0.05   | 62.6%                    | <0.05                     | 0.49                      |
| Insulin vs. non-drugs  | 6              | 1.89 (1.25-2.88) | <0.05   | 68.2%                    | <0.05                     |                           |
| <b>Region</b>          |                |                  |         |                          |                           |                           |
| USA                    | 4              | 1.53 (1.21-1.93) | <0.05   | 75.4%                    | <0.05                     | 0.31                      |
| Asia                   | 9              | 1.60 (1.22-2.10) | <0.05   | 75.4%                    | 0.05                      |                           |
| Europe                 | 7              | 1.59 (1.13-2.22) | <0.05   | 45.3%                    | <0.05                     |                           |
| Africa                 | 2              | 1.77 (1.23-2.54) | <0.05   | 0.0                      | 0.85                      |                           |
| South America          | 1              | 1.28 (0.50-3.27) | >0.05   | -                        | -                         |                           |
| <b>Sample size</b>     |                |                  |         |                          |                           |                           |

|    |                   |    |                   |       |       |       |       |
|----|-------------------|----|-------------------|-------|-------|-------|-------|
| 1  |                   |    |                   |       |       |       |       |
| 2  |                   |    |                   |       |       |       |       |
| 3  | ≥1000             | 7  | 1.64 (1.39-1.93)  | <0.05 | 77.5% | <0.05 | 0.71  |
| 4  |                   |    |                   |       |       |       |       |
| 5  | < 1000            | 17 | 1.56 (1.27-1.91)  | <0.05 | 46.7% | <0.05 |       |
| 6  |                   |    |                   |       |       |       |       |
| 7  |                   |    |                   |       |       |       |       |
| 8  | <b>Mean age</b>   |    |                   |       |       |       |       |
| 9  |                   |    |                   |       |       |       |       |
| 10 |                   |    |                   |       |       |       |       |
| 11 | ≥ 60.0            | 10 | 1.60 (1.30-1.97)  | <0.05 | 61.8% | <0.05 | 0.92  |
| 12 |                   |    |                   |       |       |       |       |
| 13 | < 60.0            | 10 | 1.57 (1.18-2.09)  | <0.05 | 68.0% | <0.05 |       |
| 14 |                   |    |                   |       |       |       |       |
| 15 |                   |    |                   |       |       |       |       |
| 16 | <b>Percentage</b> |    |                   |       |       |       |       |
| 17 | <b>male</b>       |    |                   |       |       |       |       |
| 18 | <b>(%)</b>        |    |                   |       |       |       |       |
| 19 |                   |    |                   |       |       |       |       |
| 20 |                   |    |                   |       |       |       |       |
| 21 | ≥ 50.0            | 13 | 1.59 (1.29-1.96)  | <0.05 | 75.1% | <0.05 | 0.82  |
| 22 |                   |    |                   |       |       |       |       |
| 23 | < 50.0            | 11 | 1.55 (1.43-1.68)  | <0.05 | 0.0   | 0.71  |       |
| 24 |                   |    |                   |       |       |       |       |
| 25 |                   |    |                   |       |       |       |       |
| 26 | <b>Prevalence</b> |    |                   |       |       |       |       |
| 27 | <b>of</b>         |    |                   |       |       |       |       |
| 28 | <b>depression</b> |    |                   |       |       |       |       |
| 29 |                   |    |                   |       |       |       |       |
| 30 | ≥ 20%             | 14 | 1.84 (1.59-2.12)  | <0.05 | 11.7% | 0.33  | <0.05 |
| 31 |                   |    |                   |       |       |       |       |
| 32 | < 20%             | 10 | 1.43 (1.19 -1.70) | <0.05 | 74.0% | <0.05 |       |
| 33 |                   |    |                   |       |       |       |       |
| 34 |                   |    |                   |       |       |       |       |
| 35 |                   |    |                   |       |       |       |       |
| 36 | <b>NOS scale</b>  |    |                   |       |       |       |       |
| 37 |                   |    |                   |       |       |       |       |
| 38 | 7 or 8            | 11 | 1.45 (1.16-1.82)  | <0.05 | 72.3% | <0.05 | 0.22  |
| 39 |                   |    |                   |       |       |       |       |
| 40 | <7                | 13 | 1.72 (1.47-2.00)  | <0.05 | 42.8% | 0.05  |       |
| 41 |                   |    |                   |       |       |       |       |
| 42 |                   |    |                   |       |       |       |       |
| 43 |                   |    |                   |       |       |       |       |
| 44 |                   |    |                   |       |       |       |       |
| 45 |                   |    |                   |       |       |       |       |
| 46 |                   |    |                   |       |       |       |       |
| 47 |                   |    |                   |       |       |       |       |
| 48 |                   |    |                   |       |       |       |       |
| 49 |                   |    |                   |       |       |       |       |
| 50 |                   |    |                   |       |       |       |       |
| 51 |                   |    |                   |       |       |       |       |
| 52 |                   |    |                   |       |       |       |       |
| 53 |                   |    |                   |       |       |       |       |
| 54 |                   |    |                   |       |       |       |       |
| 55 |                   |    |                   |       |       |       |       |
| 56 |                   |    |                   |       |       |       |       |
| 57 |                   |    |                   |       |       |       |       |
| 58 |                   |    |                   |       |       |       |       |
| 59 |                   |    |                   |       |       |       |       |
| 60 |                   |    |                   |       |       |       |       |

### Publication bias

For studies reporting the adjusted ORs, the funnel plot was symmetrical (Figure 4). No publication bias was shown by the Egger test (P = 0.94) or Begg's test (P = 0.67). For studies presenting the crude ORs, the funnel plot was symmetrical (Figure 5). We did not detect publication bias by Egger (P = 0.39) or Begg's test (P = 0.94).

## DISCUSSION

This is the first meta-analysis that estimated the magnitude of the association between insulin therapy and depression. The pooled data of adjusted ORs proved that T2DM patients on insulin treatment was associated with the prevalence of depressive syndromes compared to those without insulin therapy. When pooling crude ORs, this significant association was permanent. We specifically compared insulin use with oral-antidiabetic drugs. Both of the adjusted data (OR = 1.42) and the unadjusted data (OR = 1.61) showed that insulin users were relation to the greater risk of depression.

The source of heterogeneity was explored carefully. In sensitivity analysis, no substantial change in heterogeneity was revealed when excluding any individual study, suggesting the homogeneity of the pooled effect estimates. The prevalence of depression could be different according to ethnicities.[55] In subgroup analyses of adjusted data, we found that the significance displayed for Asian studies. Non-significant result was shown for studies with sample size below 1000, suggesting that the result was unstable for small sample size. Substantial change of heterogeneity was also detected for the subgroups of insufficient degree of adjustment and depression identified by medical records. However, the number of eligible studies was rather small to draw firm conclusions. For studies of depression prevalence below 20%, substantial change in the effect estimates was shown for adjusted data, and obvious change in heterogeneity for crude data. Thus, it may partly account for the heterogeneity. Finally, the significant association was detected if the mean age was < 60.0 years, percentage male < 50.0%, and NOS < 7 for adjusted data. This might be due to that younger patients were associated with higher prevalence of depression, and women receiving insulin therapy might be under greater risk of depression compared to men.

The mechanisms link diabetes and depression were complex and still unclear. Depression and T2DM could develop in parallel through shared biological processes.

1  
2  
3 The involved pathways include the innate inflammatory response, the  
4 hypothalamic-pituitary-adrenal axis, circadian rhythms, and insulin resistance.[3]  
5  
6 Although the overall prevalence of depression is high in diabetic patients, the  
7 DESMOND trial reported that it was not so in newly diagnosed T2DM.[56]  
8  
9 Screen-detected patients with T2DM showed low distress and anxiety at the time of  
10 diagnosis, with a significant increase during the following 12 months.[57] In  
11 accordance with these findings, we confirmed that insulin therapy was associated with  
12 increased prevalence of depression. For patients on insulin therapy, they had less  
13 endogenous insulin and were therefore more susceptible to metabolic dysregulation  
14 than patients who might have some residual insulin secretory activity. Especially,  
15 patients who are more metabolically labile are more vulnerable to depression.[16]  
16  
17 Besides, insulin therapy is always a symbol of more advanced type 2 diabetes. The  
18 patients' negative attitudes toward insulin therapy may contribute to delays for insulin  
19 initiation, prolonged duration of hyperglycemia, and increased risk of diabetic  
20 complications.[58] Psychological insulin resistance (PIR) has been defined as  
21 psychological opposition towards insulin treatment in both diabetic patients and their  
22 prescribers. They may display fear of insulin injection and self-testing, complex  
23 regimen, hypoglycemia, and weight gain; a perceived loss of control over one's life;  
24 poor self-efficacy concerning insulin treatment; and perceived lack of positive  
25 outcomes related to insulin.[58-60] These psychological aspects may explain for the  
26 increased risk of depression when insulin was prescribed.  
27  
28  
29  
30  
31  
32  
33  
34  
35  
36  
37  
38  
39  
40  
41

42 The primary strength of this study was the systematic and expansive search of  
43 multiple databases, which minimized the risk of missing data. The meta-analysis  
44 identified 28 studies enrolling worldwide-distributed participants. Both of the adjusted  
45 and crude effect estimates were analyzed and demonstrated consistent results. The  
46 confidential intervals were narrow, suggesting the precision of pooled results.[61] For  
47 adjusted data, most studies had full adjustment for confounders. The subtypes of  
48 non-insulin therapy, including oral drug and non-drug treatment, were analyzed  
49 separately. The between-study heterogeneity was intensively explored by sensitivity,  
50  
51  
52  
53  
54  
55  
56  
57  
58  
59  
60



1  
2  
3 subgroup, and meta-regression analyses. Besides, no publication bias was detected  
4 among the selected studies.  
5  
6

7  
8 We were aware of the limitations of this meta-analysis. Our findings mainly  
9 relied on cross-sectional data; as such, the causal and temporal relationship between  
10 insulin use and depression could not be established. Some studies had a small sample  
11 size which may influence the statistical power. The response rate was only reported by  
12 several studies. The unmeasured differences between respondents and nonrespondents  
13 may potentially influence the pooled results. Most of the studies used self-reported  
14 scales rather than clinical interview-based assessments to identify depression.  
15 Prevalence of depression was generally much higher using the self-reported scales  
16 than standardized diagnostic interviews.[20, 62] Furthermore, the findings of insulin  
17 therapy versus specific oral drugs and the prevalence of depression were not  
18 illustrated due to inclusion of less number of studies in each subset. Moreover,  
19 background oral anti-diabetic drug uses in insulin group might affect the associations  
20 of insulin use with the risk of depressive syndromes, while these information was not  
21 available in mostly included studies. In addition, although subgroup analyses based on  
22 several factors were conducted, while substantial residual heterogeneity were  
23 observed in numerous subsets. These results were restricted by uncontrolled baseline  
24 characteristics of included patients and studies. Finally, the impact of the total number  
25 of daily insulin injections with depression development was included only in few  
26 studies, and these contributed as potential confounders in patients who received  
27 insulin therapy and the progression of depression.  
28  
29  
30  
31  
32  
33  
34  
35  
36  
37  
38  
39  
40  
41  
42  
43  
44  
45  
46  
47

## 48 **CONCLUSIONS**

49  
50 In conclusion, we noted type 2 diabetic patients who were prescribed insulin was  
51 relation to depressive syndromes. For insulin-users, careful monitoring of depressive  
52 symptoms should be incorporated into the disease management. Intensified  
53  
54  
55  
56  
57  
58  
59  
60

1  
2  
3  
4  
5  
6  
7  
8  
9  
10  
11  
12  
13  
14  
15  
16  
17  
18  
19  
20  
21  
22  
23  
24  
25  
26  
27  
28  
29  
30  
31  
32  
33  
34  
35  
36  
37  
38  
39  
40  
41  
42  
43  
44  
45  
46  
47  
48  
49  
50  
51  
52  
53  
54  
55  
56  
57  
58  
59  
60

psychological and education programs should be carried out to prevent depressive illness after insulin initiation in the primary care settings.

For peer review only

## Acknowledgments

None.

## Funding

This research received no specific grant from any funding agency in the public, commercial or not-for-profit sectors.

## Conflict of interest

The authors declare that they have no competing interests.

## Authors' contributions

XSB contributed to study concepts, manuscript preparation, literature research and drafting the manuscript. ZML, ZSL and DWY carried out literature research, data analysis and revising the manuscript for important content. All authors read and approved the final manuscript.

## Data sharing statement

No additional data available.

## References

- 1 Tabak AG, Akbaraly TN, Batty GD, et al. Depression and type 2 diabetes: a causal association? *Lancet Diabetes Endocrinol* 2014;2:236-45.
- 2 Type 2 Diabetes in Adults: Management. National Institute for Health and Care Excellence: Clinical Guidelines. London 2015.
- 3 Moulton CD, Pickup JC, Ismail K. The link between depression and diabetes: the search for shared mechanisms. *Lancet Diabetes Endocrinol* 2015;3:461-71.
- 4 Mezuk B, Eaton WW, Albrecht S, et al. Depression and type 2 diabetes over the lifespan: a meta-analysis. *Diabetes Care* 2008;31:2383-90.
- 5 Nouwen A, Winkley K, Twisk J, et al. Type 2 diabetes mellitus as a risk factor for the onset of depression: a systematic review and meta-analysis. *Diabetologia* 2010;53:2480-6.
- 6 van Dooren FE, Nefs G, Schram MT, et al. Depression and risk of mortality in people with diabetes mellitus: a systematic review and meta-analysis. *PLoS One* 2013;8:e57058.
- 7 Kan C, Silva N, Golden SH, et al. A systematic review and meta-analysis of the association between depression and insulin resistance. *Diabetes Care* 2013;36:480-9.
- 8 Ismail-Beigi F. Clinical practice. Glycemic management of type 2 diabetes mellitus. *N Engl J Med* 2012;366:1319-27.
- 9 Ohn JH, Kwak SH, Cho YM, et al. 10-year trajectory of beta-cell function and insulin sensitivity in the development of type 2 diabetes: a community-based prospective cohort study. *Lancet Diabetes Endocrinol* 2016;4:27-34.
- 10 Cahn A, Miccoli R, Dardano A, et al. New forms of insulin and insulin therapies for the treatment of type 2 diabetes. *Lancet Diabetes Endocrinol* 2015;3:638-52.
- 11 Home P, Riddle M, Cefalu WT, et al. Insulin therapy in people with type 2

1  
2  
3 diabetes: opportunities and challenges? *Diabetes Care* 2014;37:1499-508.

4  
5  
6 12 Weng J, Li Y, Xu W, et al. Effect of intensive insulin therapy on beta-cell function  
7 and glycaemic control in patients with newly diagnosed type 2 diabetes: a multicentre  
8 randomised parallel-group trial. *Lancet* 2008;371:1753-60.

9  
10  
11  
12 13 Kramer CK, Zinman B, Retnakaran R. Short-term intensive insulin therapy in  
14 type 2 diabetes mellitus: a systematic review and meta-analysis. *Lancet Diabetes*  
15 *Endocrinol* 2013;1:28-34.

16  
17  
18 14 Holman RR, Paul SK, Bethel MA, et al. 10-year follow-up of intensive glucose  
19 control in type 2 diabetes. *N Engl J Med* 2008;359:1577-89.

20  
21  
22  
23 15 Holmes-Truscott E, Skinner TC, Pouwer F, et al. Explaining psychological  
24 insulin resistance in adults with non-insulin-treated type 2 diabetes: The roles of  
25 diabetes distress and current medication concerns. Results from Diabetes  
26 MILES-Australia. *Prim Care Diabetes* 2016;10:75-82.

27  
28  
29  
30  
31 16 Surwit RS, van Tilburg MA, Parekh PI, et al. Treatment regimen determines the  
32 relationship between depression and glycemic control. *Diabetes Res Clin Pract*  
33 2005;69:78-80.

34  
35  
36  
37 17 Noh JH, Park JK, Lee HJ, et al. Depressive symptoms of type 2 diabetics treated  
38 with insulin compared to diabetics taking oral anti-diabetic drugs: a Korean study.  
39 *Diabetes Res Clin Pract* 2005;69:243-8.

40  
41  
42  
43 18 Li C, Ford ES, Strine TW, et al. Prevalence of depression among U.S. adults with  
44 diabetes: findings from the 2006 behavioral risk factor surveillance system. *Diabetes*  
45 *Care* 2008;31:105-7.

46  
47  
48  
49 19 Al-Amer RM, Sobeh MM, Zayed AA, et al. Depression among adults with  
50 diabetes in Jordan: risk factors and relationship to blood sugar control. *J Diabetes*  
51 *Complications* 2011;25:247-52.

52  
53  
54  
55  
56 20 Bell RA, Smith SL, Arcury TA, et al. Prevalence and correlates of depressive

1  
2  
3 symptoms among rural older African Americans, Native Americans, and whites with  
4 diabetes. *Diabetes Care* 2005;28:823-9.

5  
6  
7  
8 21 Katon W, von Korff M, Ciechanowski P, et al. Behavioral and clinical factors  
9 associated with depression among individuals with diabetes. *Diabetes Care*  
10 2004;27:914-20.

11  
12  
13  
14 22 Mikailiukstiene A, Juozulynas A, Narkauskaite L, et al. Quality of life in relation  
15 to social and disease factors in patients with type 2 diabetes in Lithuania. *Med Sci*  
16 *Monit* 2013;19:165-74.

17  
18  
19  
20 23 Stroup DF, Berlin JA, Morton SC, et al. Meta-analysis of observational studies in  
21 epidemiology: a proposal for reporting. Meta-analysis Of Observational Studies in  
22 Epidemiology (MOOSE) group. *JAMA* 2000;283:2008-12.

23  
24  
25  
26 24 Smarr KL, Keefer AL. Measures of depression and depressive symptoms: Beck  
27 Depression Inventory-II (BDI-II), Center for Epidemiologic Studies Depression Scale  
28 (CES-D), Geriatric Depression Scale (GDS), Hospital Anxiety and Depression Scale  
29 (HADS), and Patient Health Questionnaire-9 (PHQ-9). *Arthritis Care Res (Hoboken)*  
30 2011;63 Suppl 11:S454-66.

31  
32  
33  
34  
35  
36 25 Organization WH. The ICD-10 classification of mental and behavioural disorders:  
37 clinical descriptions and diagnostic guidelines: Geneva: World Health Organization  
38 1992.

39  
40  
41  
42 26 Association D-AP. Diagnostic and statistical manual of mental disorders.  
43 Arlington: American Psychiatric Publishing 2013.

44  
45  
46  
47 27 Wells GA, Shea B, D OC. The Newcastle-Ottawa Scale (NOS) for assessing the  
48 quality of nonrandomised studies in meta-analyses.  
49 [http://www.ohrica/programs/clinical\\_epidemiology/oxfordasp](http://www.ohrica/programs/clinical_epidemiology/oxfordasp) (accessed April 27,  
50 2016) 2008.

51  
52  
53  
54  
55 28 Higgins JP, Thompson SG, Deeks JJ, et al. Measuring inconsistency in

1  
2  
3 meta-analyses. *BMJ* 2003;327:557-60.

4  
5  
6 29 Begg CB, Mazumdar M. Operating characteristics of a rank correlation test for  
7 publication bias. *Biometrics* 1994;50:1088-101.

8  
9  
10 30 Egger M, Davey Smith G, Schneider M, et al. Bias in meta-analysis detected by a  
11 simple, graphical test. *BMJ* 1997;315:629-34.

12  
13  
14 31 Pawaskar MD, Anderson RT, Balkrishnan R. Self-reported predictors of  
15 depressive symptomatology in an elderly population with type 2 diabetes mellitus: a  
16 prospective cohort study. *Health Qual Life Outcomes* 2007;5:50.

17  
18  
19 32 Zhang W, Xu H, Zhao S, et al. Prevalence and influencing factors of co-morbid  
20 depression in patients with type 2 diabetes mellitus: a General Hospital based study.  
21 *Diabetol Metab Syndr* 2015;7:60.

22  
23  
24 33 Ali S, Davies MJ, Taub NA, et al. Prevalence of diagnosed depression in South  
25 Asian and white European people with type 1 and type 2 diabetes mellitus in a UK  
26 secondary care population. *Postgrad Med J* 2009;85:238-43.

27  
28  
29 34 Gorska-Ciebiada M, Saryusz-Wolska M, Ciebiada M, et al. Mild cognitive  
30 impairment and depressive symptoms in elderly patients with diabetes: prevalence,  
31 risk factors, and comorbidity. *J Diabetes Res* 2014;2014:179648.

32  
33  
34 35 Camara A, Balde NM, Enoru S, et al. Prevalence of anxiety and depression  
35 among diabetic African patients in Guinea: association with HbA1c levels. *Diabetes*  
36 *Metab* 2015;41:62-8.

37  
38  
39 36 Raval A, Dhanaraj E, Bhansali A, et al. Prevalence & determinants of depression  
40 in type 2 diabetes patients in a tertiary care centre. *Indian J Med Res*  
41 2010;132:195-200.

42  
43  
44 37 Roy T, Lloyd CE, Parvin M, et al. Prevalence of co-morbid depression in  
45 out-patients with type 2 diabetes mellitus in Bangladesh. *BMC Psychiatry*  
46 2012;12:123.

1  
2  
3 38 Jacob L, Kostev K. Prevalence of depression in type 2 diabetes patients in  
4 German primary care practices. *J Diabetes Complications* 2016;30:432-7.  
5

6  
7 39 Sun JC, Xu M, Lu JL, et al. Associations of depression with impaired glucose  
8 regulation, newly diagnosed diabetes and previously diagnosed diabetes in Chinese  
9 adults. *Diabet Med* 2015;32:935-43.  
10  
11

12  
13 40 Hermanns N, Kulzer B, Krichbaum M, et al. How to screen for depression and  
14 emotional problems in patients with diabetes: comparison of screening characteristics  
15 of depression questionnaires, measurement of diabetes-specific emotional problems  
16 and standard clinical assessment. *Diabetologia* 2006;49:469-77.  
17  
18  
19

20  
21 41 Stankovic Z, Jasovic-Gasic M, Zamaklar M. Psycho-social and clinical variables  
22 associated with depression in patients with type 2 diabetes. *Psychiatr Danub*  
23 2011;23:34-44.  
24  
25  
26

27  
28 42 Zuberi SI, Syed EU, Bhatti JA. Association of depression with treatment  
29 outcomes in Type 2 Diabetes Mellitus: a cross-sectional study from Karachi, Pakistan.  
30 *BMC Psychiatry* 2011;11:27.  
31  
32  
33

34  
35 43 Lynch CP, Hernandez-Tejada MA, Strom JL, et al. Association between  
36 spirituality and depression in adults with type 2 diabetes. *Diabetes Educ*  
37 2012;38:427-35.  
38  
39  
40

41 44 Osme SF, Ferreira L, Jorge MT, et al. Difference between the prevalence of  
42 symptoms of depression and anxiety in non-diabetic smokers and in patients with type  
43 2 diabetes with and without nicotine dependence. *Diabetol Metab Syndr* 2012;4:39.  
44  
45  
46

47 45 Trento M, Raballo M, Trevisan M, et al. A cross-sectional survey of depression,  
48 anxiety, and cognitive function in patients with type 2 diabetes. *Acta Diabetol*  
49 2012;49:199-203.  
50  
51  
52

53 46 Joseph N, Unnikrishnan B, Raghavendra Babu YP, et al. Proportion of depression  
54 and its determinants among type 2 diabetes mellitus patients in various tertiary care  
55  
56



1  
2  
3 hospitals in Mangalore city of South India. *Indian J Endocrinol Metab*  
4 2013;17:681-8.  
5

6  
7 47 Hayashino Y, Mashitani T, Tsujii S, et al. Elevated Levels of hs-CRP Are  
8 Associated With High Prevalence of Depression in Japanese Patients With Type 2  
9 Diabetes: The Diabetes Distress and Care Registry at Tenri (DDCRT 6). *Diabetes*  
10 *Care* 2014;37:2459-65.  
11  
12

13  
14 48 Sweileh WM, Abu-Hadeed HM, Al-Jabi SW, et al. Prevalence of depression  
15 among people with type 2 diabetes mellitus: a cross sectional study in Palestine. *BMC*  
16 *Public Health* 2014;14:163.  
17  
18

19  
20 49 Kikuchi Y, Iwase M, Fujii H, et al. Association of severe hypoglycemia with  
21 depressive symptoms in patients with type 2 diabetes: the Fukuoka Diabetes Registry.  
22 *BMJ Open Diabetes Res Care* 2015;3:e000063.  
23  
24  
25

26  
27 50 Luca A, Luca M, Di Mauro M, et al. Alexithymia, more than depression,  
28 influences glycaemic control of type 2 diabetic patients. *J Endocrinol Invest*  
29 2015;38:653-60.  
30  
31  
32

33  
34 51 Rodríguez Calvín JL, Zapatero Gaviria A, Martín Ríos MD. Prevalence of  
35 depression in type 2 diabetes mellitus. *Revista Clínica Española (English Edition)*  
36 2015;215:156-64.  
37  
38  
39

40  
41 52 Zhang Y, Ting RZ, Yang W, et al. Depression in Chinese patients with type 2  
42 diabetes: associations with hyperglycemia, hypoglycemia, and poor treatment  
43 adherence. *J Diabetes* 2015;7:800-8.  
44  
45  
46

47 53 Cols-Sagarra C, Lopez-Simarro F, Alonso-Fernandez M, et al. Prevalence of  
48 depression in patients with type 2 diabetes attended in primary care in Spain. *Prim*  
49 *Care Diabetes* 2016.  
50  
51

52  
53 54 Habtewold TD, Alemu SM, Haile YG. Sociodemographic, clinical, and  
54 psychosocial factors associated with depression among type 2 diabetic outpatients in  
55  
56

1  
2  
3 Black Lion General Specialized Hospital, Addis Ababa, Ethiopia: a cross-sectional  
4 study. *BMC Psychiatry* 2016;16:103.

5  
6  
7 55 Harris PA. The impact of age, gender, race, and ethnicity on the diagnosis and  
8 treatment of depression. *J Manag Care Pharm* 2004;10:S2-7.

9  
10  
11 56 Skinner TC, Carey ME, Cradock S, et al. Depressive symptoms in the first year  
12 from diagnosis of Type 2 diabetes: results from the DESMOND trial. *Diabet Med*  
13 2010;27:965-7.

14  
15  
16 57 Thoolen BJ, de Ridder DT, Bensing JM, et al. Psychological outcomes of patients  
17 with screen-detected type 2 diabetes: the influence of time since diagnosis and  
18 treatment intensity. *Diabetes Care* 2006;29:2257-62.

19  
20  
21 58 Petrak F, Stridde E, Leverkus F, et al. Development and validation of a new  
22 measure to evaluate psychological resistance to insulin treatment. *Diabetes Care*  
23 2007;30:2199-204.

24  
25  
26 59 Brod M, Kongso JH, Lessard S, et al. Psychological insulin resistance: patient  
27 beliefs and implications for diabetes management. *Qual Life Res* 2009;18:23-32.

28  
29  
30 60 Polonsky WH, Hajos TR, Dain MP, et al. Are patients with type 2 diabetes  
31 reluctant to start insulin therapy? An examination of the scope and underpinnings of  
32 psychological insulin resistance in a large, international population. *Curr Med Res*  
33 *Opin* 2011;27:1169-74.

34  
35  
36 61 Guyatt GH, Oxman AD, Kunz R, et al. GRADE guidelines 6. Rating the quality  
37 of evidence--imprecision. *J Clin Epidemiol* 2011;64:1283-93.

38  
39  
40 62 Anderson RJ, Freedland KE, Clouse RE, et al. The prevalence of comorbid  
41 depression in adults with diabetes: a meta-analysis. *Diabetes Care* 2001;24:1069-78.

## Figure legends

**Figure 1.** The selection process for eligible studies.

**Figure 2.** The pooled adjusted odds ratio for the risk of depression in insulin-prescribed patients compared with those without insulin therapy.

**Figure 3.** The pooled crude odds ratio for the risk of depression in insulin-prescribed patients compared with those without insulin therapy.

**Figure 4.** The funnel plot for the studies reporting adjusted odds ratios.

**Figure 5.** The funnel plot for the studies presenting crude odds ratios.

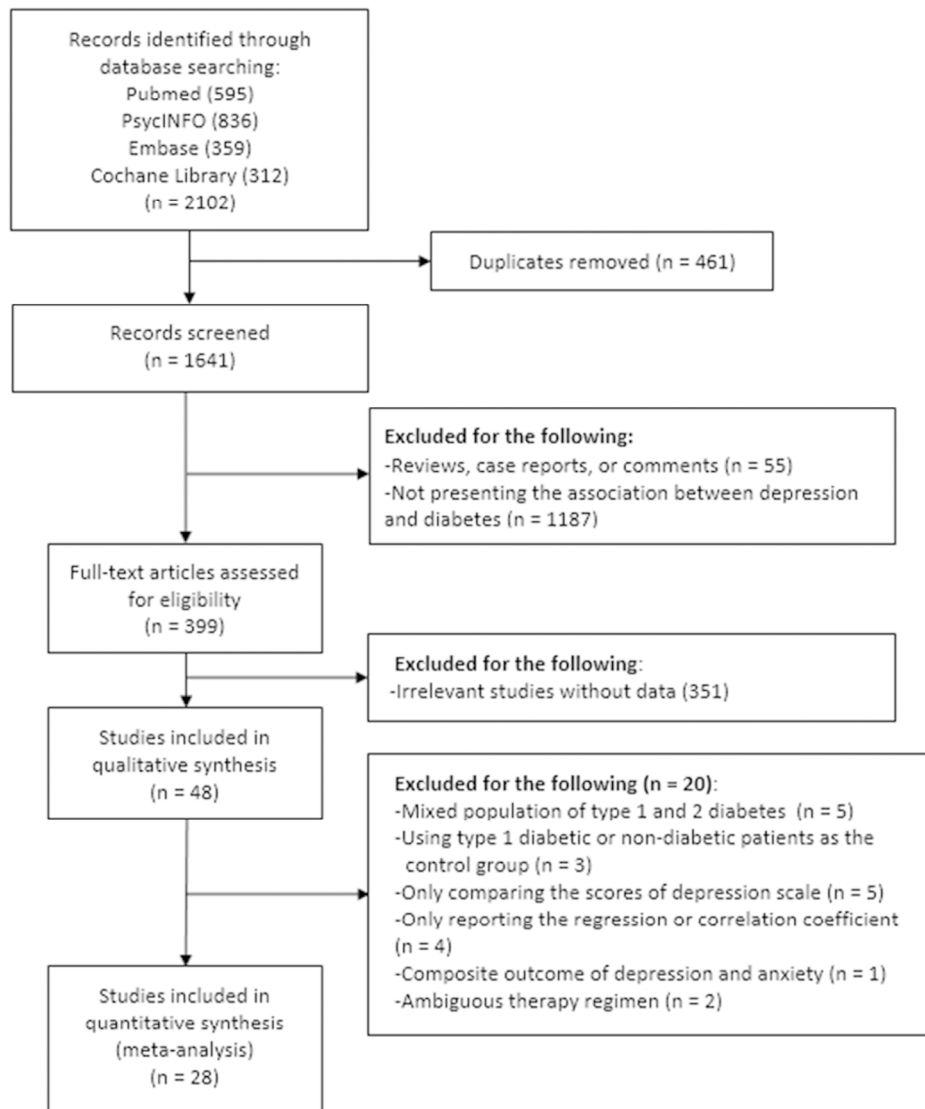

192x217mm (300 x 300 DPI)

1  
2  
3  
4  
5  
6  
7  
8  
9  
10  
11  
12  
13  
14  
15  
16  
17  
18  
19  
20  
21  
22  
23  
24  
25  
26  
27  
28  
29  
30  
31  
32  
33  
34  
35  
36  
37  
38  
39  
40  
41  
42  
43  
44  
45  
46  
47  
48  
49  
50  
51  
52  
53  
54  
55  
56  
57  
58  
59  
60

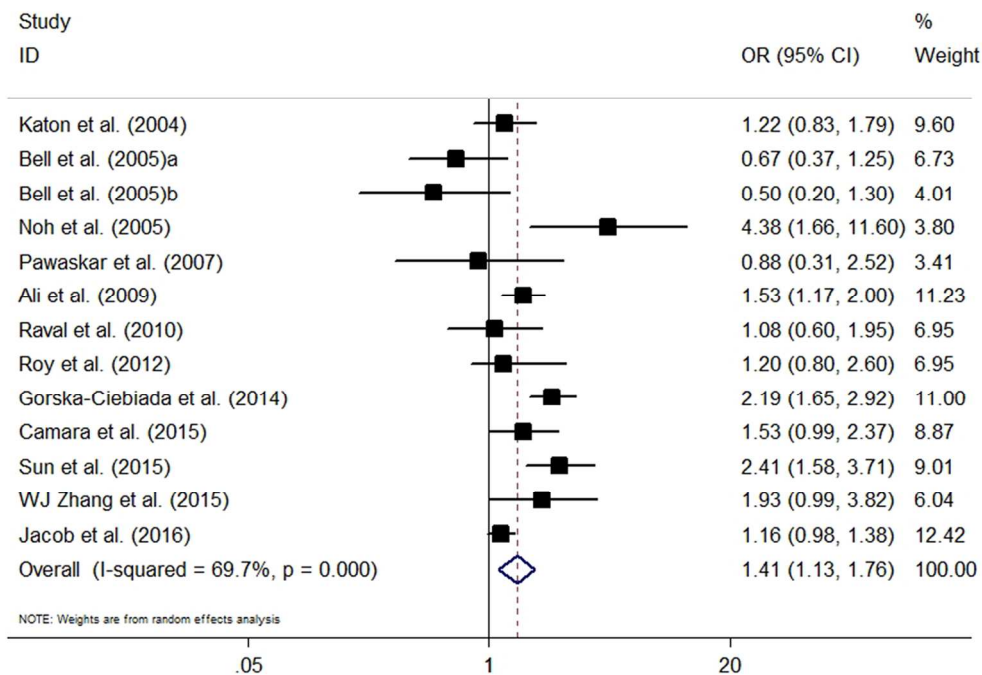

170x116mm (300 x 300 DPI)

View only

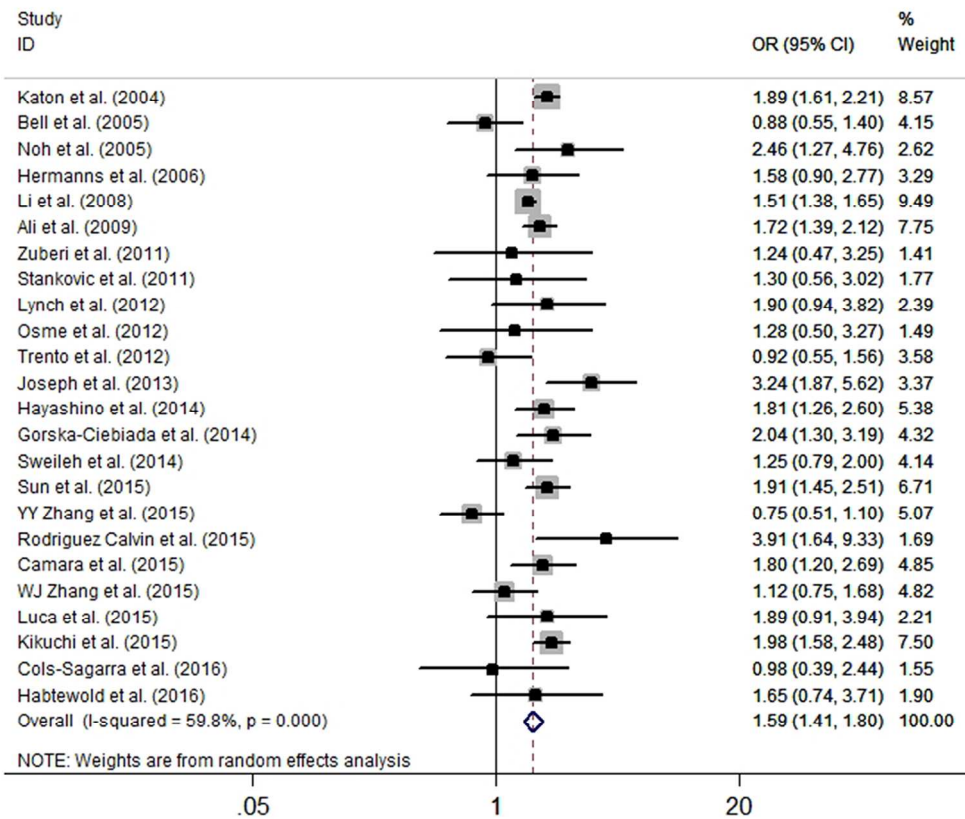

170x140mm (300 x 300 DPI)

1  
2  
3  
4  
5  
6  
7  
8  
9  
10  
11  
12  
13  
14  
15  
16  
17  
18  
19  
20  
21  
22  
23  
24  
25  
26  
27  
28  
29  
30  
31  
32  
33  
34  
35  
36  
37  
38  
39  
40  
41  
42  
43  
44  
45  
46  
47  
48  
49  
50  
51  
52  
53  
54  
55  
56  
57  
58  
59  
60



170x119mm (300 x 300 DPI)

Review only

1  
2  
3  
4  
5  
6  
7  
8  
9  
10  
11  
12  
13  
14  
15  
16  
17  
18  
19  
20  
21  
22  
23  
24  
25  
26  
27  
28  
29  
30  
31  
32  
33  
34  
35  
36  
37  
38  
39  
40  
41  
42  
43  
44  
45  
46  
47  
48  
49  
50  
51  
52  
53  
54  
55  
56  
57  
58  
59  
60

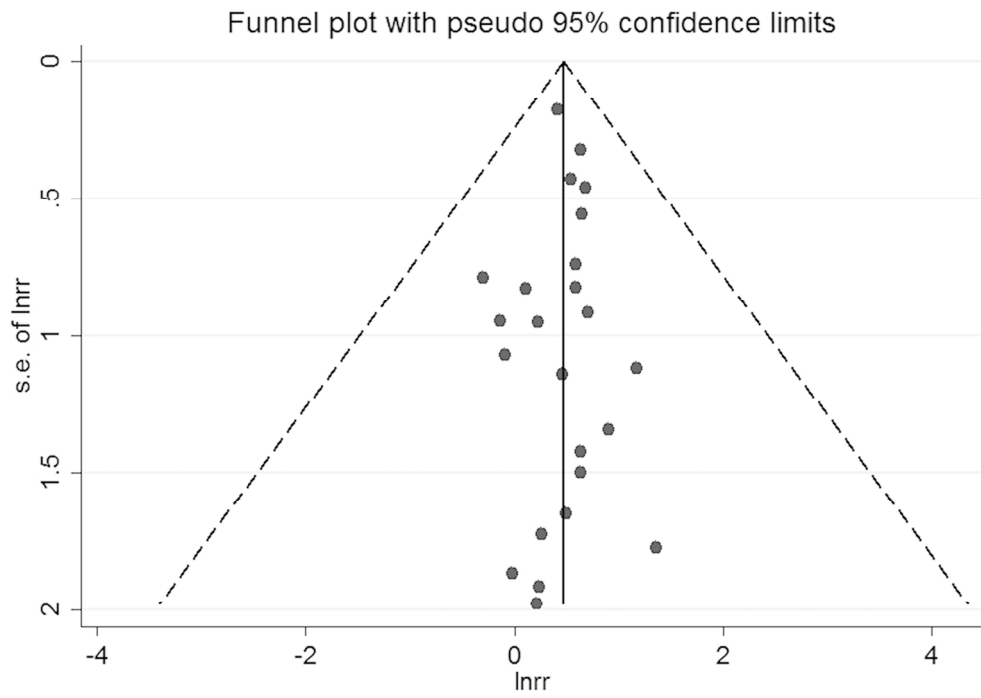

170x119mm (300 x 300 DPI)

new only



Supplementary Figure S1. Sensitivity analysis for adjusted data

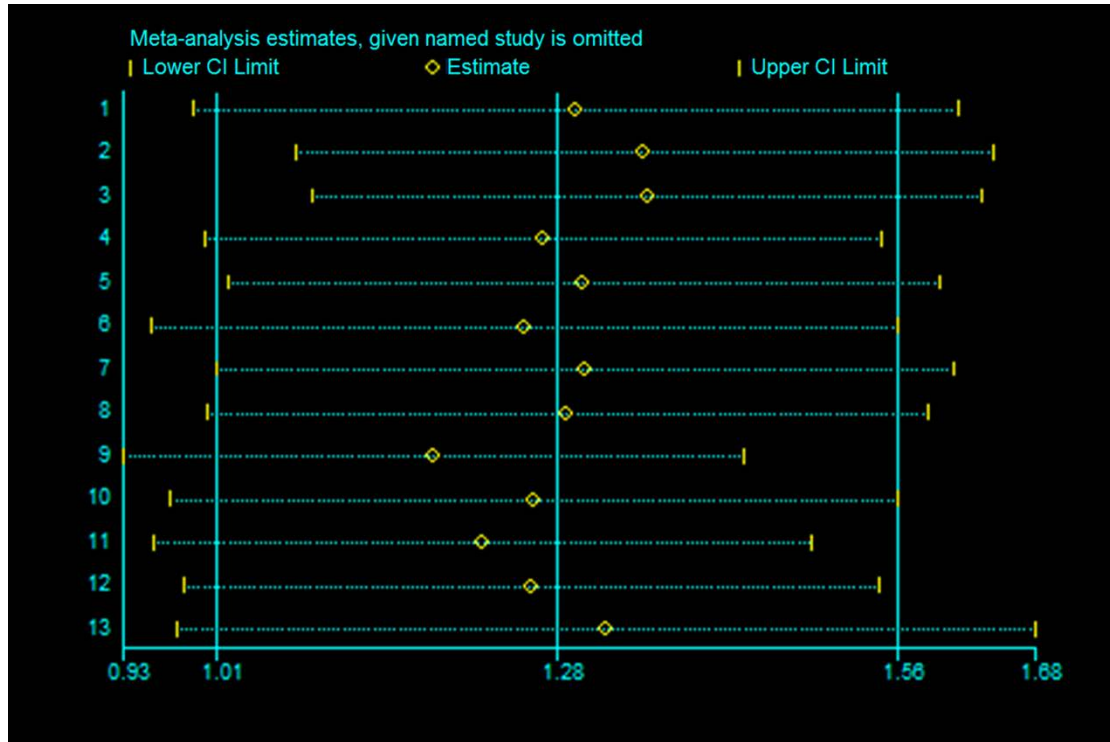

review only

1  
2  
3  
4  
5  
6  
7  
8  
9  
10  
11  
12  
13  
14  
15  
16  
17  
18  
19  
20  
21  
22  
23  
24  
25  
26  
27  
28  
29  
30  
31  
32  
33  
34  
35  
36  
37  
38  
39  
40  
41  
42  
43  
44  
45  
46  
47  
48  
49  
50  
51  
52  
53  
54  
55  
56  
57  
58  
59  
60

Supplementary Figure S2. Sensitivity analysis for crude data

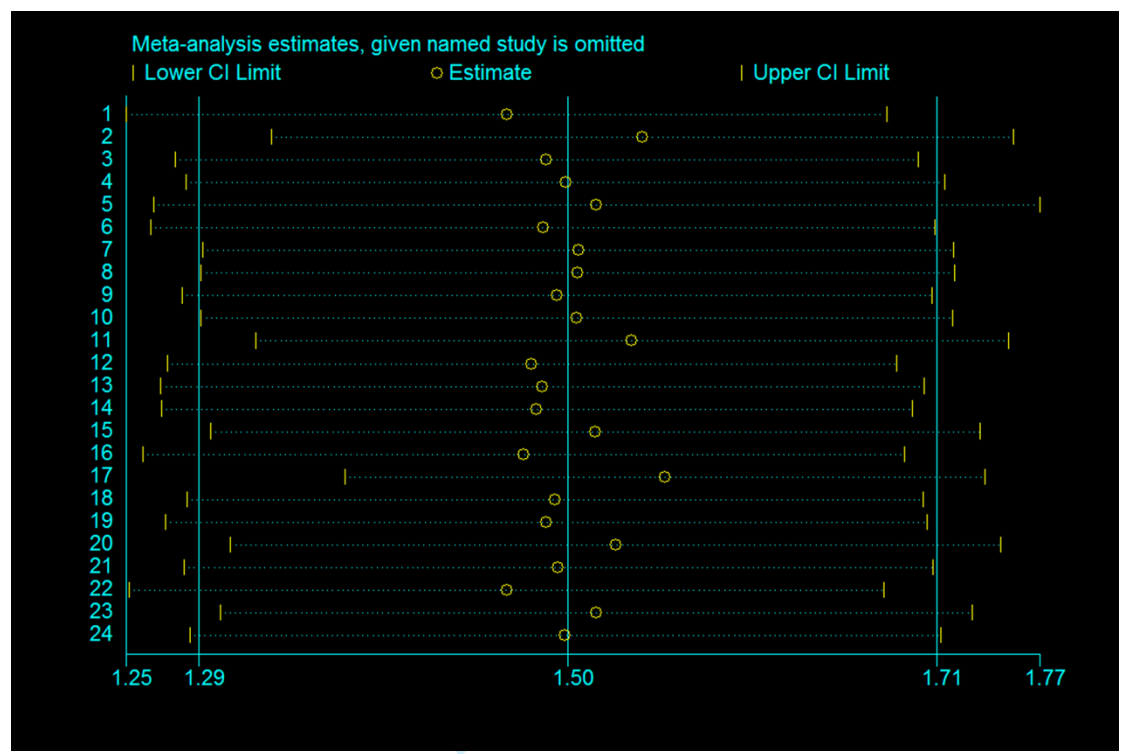

review only

**MOOSE Statement - Reporting Checklist for Authors, Editors, and Reviewers of Meta-analyses of Observational Studies**

| <b>Reporting Criteria</b>                                                                                                                  | <b>Reported (Yes/No)</b> | <b>Reported on Page</b> |
|--------------------------------------------------------------------------------------------------------------------------------------------|--------------------------|-------------------------|
| <b>Reporting of background should include</b>                                                                                              |                          |                         |
| Problem definition                                                                                                                         | Yes                      | 4                       |
| Hypothesis statement                                                                                                                       | Yes                      | 4                       |
| Description of study outcomes                                                                                                              | Yes                      | 4                       |
| Type of exposure or intervention used                                                                                                      | Yes                      | 4                       |
| Type of study designs used                                                                                                                 | Yes                      | 4                       |
| Study population                                                                                                                           | Yes                      | 4                       |
| <b>Reporting of search strategy should include</b>                                                                                         |                          |                         |
| Qualifications of searchers (eg librarians and investigators)                                                                              | Yes                      | 5                       |
| Search strategy, including time period used in the synthesis and key words                                                                 | Yes                      | 5                       |
| Effort to include all available studies, including contact with authors                                                                    | Yes                      | 5                       |
| Databases and registries searched                                                                                                          | Yes                      | 5                       |
| Search software used, name and version, including special features used (eg explosion)                                                     | Yes                      | 5                       |
| Use of hand searching (eg reference lists of obtained articles)                                                                            | Yes                      | 5                       |
| List of citations located and those excluded, including justification                                                                      | Yes                      | 7                       |
| Method of addressing articles published in languages other than English                                                                    | Yes                      | 5                       |
| Method of handling abstracts and unpublished studies                                                                                       | Yes                      | 5                       |
| Description of any contact with authors                                                                                                    | No                       | NA                      |
| <b>Reporting of methods should include</b>                                                                                                 |                          |                         |
| Description of relevance or appropriateness of studies assembled for assessing the hypothesis to be tested                                 | No                       | NA                      |
| Rationale for the selection and coding of data (eg sound clinical principles or convenience)                                               | Yes                      | 5                       |
| Documentation of how data were classified and coded (eg multiple raters, blinding and interrater reliability)                              | Yes                      | 6                       |
| Assessment of confounding (eg comparability of cases and controls in studies where appropriate)                                            | Yes                      | 6                       |
| Assessment of study quality, including blinding of quality assessors, stratification or regression on possible predictors of study results | Yes                      | 6                       |

|                                                                                                                                                                                                                                                                             |     |         |
|-----------------------------------------------------------------------------------------------------------------------------------------------------------------------------------------------------------------------------------------------------------------------------|-----|---------|
| Assessment of heterogeneity                                                                                                                                                                                                                                                 | Yes | 6       |
| Description of statistical methods (eg complete description of fixed or random effects models, justification of whether the chosen models account for predictors of study results, dose-response models, or cumulative meta-analysis) in sufficient detail to be replicated | Yes | 6       |
| Provision of appropriate tables and graphics                                                                                                                                                                                                                                | Yes | 6       |
| <b>Reporting of results should include</b>                                                                                                                                                                                                                                  |     |         |
| Graphic summarizing individual study estimates and overall estimate                                                                                                                                                                                                         | Yes | 9-15    |
| Table giving descriptive information for each study included                                                                                                                                                                                                                | Yes | 9-15    |
| Results of sensitivity testing (eg subgroup analysis)                                                                                                                                                                                                                       | Yes | 19-22   |
| Indication of statistical uncertainty of findings                                                                                                                                                                                                                           | Yes | 19-22   |
| <b>Reporting of discussion should include</b>                                                                                                                                                                                                                               |     |         |
| Quantitative assessment of bias (eg publication bias)                                                                                                                                                                                                                       | Yes | 23      |
| Justification for exclusion (eg exclusion of non-English language citations)                                                                                                                                                                                                | No  | 23      |
| Assessment of quality of included studies                                                                                                                                                                                                                                   | Yes | Table 2 |
| Strengths and weaknesses                                                                                                                                                                                                                                                    | Yes | 24-25   |
| <b>Reporting of conclusions should include</b>                                                                                                                                                                                                                              |     |         |
| Consideration of alternative explanations for observed results                                                                                                                                                                                                              | Yes | 23-24   |
| Generalization of the conclusions (eg appropriate for the data presented and within the domain of the literature review)                                                                                                                                                    | Yes | 25      |
| Guidelines for future research                                                                                                                                                                                                                                              | Yes | 25      |
| Disclosure of funding source                                                                                                                                                                                                                                                | Yes | 26      |

NA: Not Applicable

# BMJ Open

## The association between insulin therapy and depression in patients with type 2 diabetes mellitus: a meta-analysis

|                                 |                                                                                                                                                                                                                                                                                                                                                        |
|---------------------------------|--------------------------------------------------------------------------------------------------------------------------------------------------------------------------------------------------------------------------------------------------------------------------------------------------------------------------------------------------------|
| Journal:                        | <i>BMJ Open</i>                                                                                                                                                                                                                                                                                                                                        |
| Manuscript ID                   | bmjopen-2017-020062.R2                                                                                                                                                                                                                                                                                                                                 |
| Article Type:                   | Research                                                                                                                                                                                                                                                                                                                                               |
| Date Submitted by the Author:   | 12-Sep-2018                                                                                                                                                                                                                                                                                                                                            |
| Complete List of Authors:       | Bai, Xiaosu; People's Hospital of Longhua New District, Department of Endocrinology<br>Liu, Zhiming; People's Hospital of Longhua New District, Department of Endocrinology<br>Li, Zhisen; People's Hospital of Longhua New District, Department of Endocrinology<br>Yan, Dewen; the Second People's Hospital of Shenzhen, Department of Endocrinology |
| <b>Primary Subject Heading</b>: | Diabetes and endocrinology                                                                                                                                                                                                                                                                                                                             |
| Secondary Subject Heading:      | Mental health, Diabetes and endocrinology                                                                                                                                                                                                                                                                                                              |
| Keywords:                       | Depression, insulin, type 2 diabetes mellitus, meta-analysis, risk factor                                                                                                                                                                                                                                                                              |
|                                 |                                                                                                                                                                                                                                                                                                                                                        |

SCHOLARONE™  
Manuscripts

View Only

1  
2  
3 **The association between insulin therapy and depression in patients with type 2**  
4 **diabetes mellitus: a meta-analysis**  
5  
6  
7  
8  
9

10 Xiaosu Bai<sup>1\*</sup>, Zhiming Liu<sup>1</sup>, Zhisen Li<sup>1</sup>, Dewen Yan<sup>2</sup>  
11

12 <sup>1</sup>Department of Endocrinology, People's Hospital of Longhua New District, Shenzhen,  
13 China  
14

15 <sup>2</sup>Department of Endocrinology, the Second People's Hospital of Shenzhen, Shenzhen,  
16 China  
17  
18  
19  
20

21  
22  
23  
24 **\*Corresponding author:**  
25

26 Xiaosu Bai  
27

28  
29 Department of Endocrinology, People's Hospital of Longhua New District, No.38  
30 Jianshe Road, Shenzhen 518109, China  
31

32  
33  
34 Tel: +86-13925297135  
35

36  
37 Email: bxslb@163.com  
38  
39  
40  
41

42 **Word count: 2791**  
43  
44  
45  
46  
47  
48  
49  
50  
51  
52  
53  
54  
55  
56  
57  
58  
59  
60

## Abstract

**Objectives:** Several type 2 diabetes mellitus (T2DM) patients have depressive disorders. Whether insulin treatment was associated with increased risk of depression remains controversial. We performed a meta-analysis to evaluate the association of insulin therapy and depression.

**Design:** A meta-analysis.

**Methods:** We conducted a systematic search of PubMed, PsycINFO, Embase and the Cochrane Library from their inception to April 2016. Epidemiological studies comparing the prevalence of depression between insulin users and non-insulin users were included. Random-effects model was used for meta-analysis. The adjusted and crude data were analyzed.

**Results:** Twenty-eight studies were included. Of these, twelve studies presented adjusted ORs. Insulin therapy was significantly associated with increased risk of depression (OR = 1.41, 95% CI 1.13-1.76, P = 0.003). Twenty-four studies provided crude data. Insulin therapy was also associated with the odds for developing depression (OR = 1.59, 95% CI 1.41-1.80, P < 0.001). When comparing insulin therapy with oral-antidiabetic drugs, significant association was observed for adjusted (OR = 1.42, 95% CI 1.08-1.86, P = 0.008) and crude (OR = 1.61, 95% CI 1.35-1.93, P < 0.001) data.

**Conclusions:** Our meta-analysis confirmed that patients on insulin therapy were significantly associated with the risk of depressive symptoms.

**Keywords:** Depression; insulin; type 2 diabetes mellitus; meta-analysis; risk factor

### Strengths and limitations of this study

- The primary strength of this study was the systematic and expansive search of multiple databases, which minimized the risk of missing data.
- Both the adjusted and crude effect estimates were analyzed and demonstrated consistent results.
- Our findings mainly relied on cross-sectional data; and as such could not establish the causal and temporal relationship between insulin use and depression.
- Some studies had small sample size, which may influence the statistical power.
- The findings of insulin therapy versus specific oral drugs and the prevalence of depression were not illustrated due to inclusion of less number of studies in each subset.



## INTRODUCTION

Diabetes and depression are major global public health problems, and both of which are likely to be among the five leading causes of disease burden by 2030 [1]. Approximately 90% of adults diagnosed with diabetes have type 2 diabetes (T2DM) currently [2]. Recently, a bidirectional link between T2DM and depression has been recognized [3]. According to a meta-analysis study, depression was associated with 60% increased risk of T2DM [4]. Meanwhile, T2DM was associated with 24% increased risk of depressive symptoms [5]. Further, depression adversely affects the prognosis and reduces the patient quality of life [6, 7]. Growing evidences have shown that T2DM and depression may share similar lifestyle factors and biological origins [3].

T2DM is a chronic and progressive disease characterized by insulin resistance and dysfunction of pancreatic islet beta cells [8, 9]. For T2DM patients, insulin is the cornerstone of treatment for lowering glucose and HbA1c concentrations [10]. Although the optimal timing and indications for insulin therapy remained controversial [11-13], most of the patients inevitably requires insulin therapy to attain adequate glycemic control in the natural history of T2DM [11, 14].

However, insulin treatment seems to be less popular than oral hypoglycemic medications. Approximately 25% of the T2DM patients are reluctant to take insulin as the “last-resort” option [15]. Some patients may experience considerable psychological disorders with the transition from oral anti-diabetic drugs to insulin. Additionally, depressive symptoms were more commonly seen in patients who undergo more frequent insulin injections per day [16]. However, there were inconsistent results regarding the correlations between insulin use and depression among the previous studies. Several studies have demonstrated positive correlation [17-19], whereas other studies opposed [20-22]. Besides, these studies varied in enrolled population, adjustment of confounding factors, and usage of depression assessment tools. Thus, we conducted a systematic review and meta-analysis to clarify the association between insulin therapy and the development of depression in

1  
2  
3 T2DM patients.  
4  
5  
6  
7

## 8 **METHODS**

### 10 **Patient and Public Involvement**

11  
12  
13 No patients were involved in study design or conduct of the study.  
14  
15

### 16 **Search strategy**

17  
18  
19 This study is reported in accordance with the Meta-analysis of Observational Studies  
20 in Epidemiology guidelines [23]. We conducted a systematic computerized search of  
21 Pubmed, Ovid PsycINFO, Embase, and the Cochrane Library for eligible studies from  
22 their inception to April 2016. The following keywords and medical subject headings  
23 were used for the search: (depression OR depressive) AND (diabetes OR diabetic)  
24 AND insulin AND (cross-sectional OR population-based OR cohort OR prospective  
25 OR retrospective OR prevalence OR survey OR database OR trial). The full search  
26 strategy for Pubmed is shown in Supplementary file. The language was restricted to  
27 English. We also manually screened the reference lists of selected studies to obtain  
28 potentially relevant records.  
29  
30  
31  
32  
33  
34  
35  
36  
37

### 38 **Inclusion and exclusion criteria**

39  
40  
41 We included studies that: (1) investigated the development of depression in insulin  
42 users and non-insulin users (oral anti-diabetic drug, diet, or no treatment) among  
43 T2DM patients; (2) reported adjusted/unadjusted odds ratios (ORs) or risk ratios  
44 (RRs), or presented raw data that could produce crude effect estimates; (3) assessed  
45 depression by self-report measures or diagnostic interviews. The self-report scales  
46 including the Patient Health Questionnaire (PHQ), Beck Depression Inventory (BDI),  
47 and the Center for Epidemiologic Studies–Depression (CES-D) Scale were used [24].  
48 The diagnostic interviews were based on the criteria of DSM or ICD [25, 26]. A  
49 threshold score was not defined as no consensus was available and the threshold  
50  
51  
52  
53  
54  
55  
56  
57  
58  
59  
60

1  
2  
3 varied in different clinical settings. Studies were excluded if: (1) T2DM was mixed  
4 with type 1 diabetes; (2) comparison was conducted between T2DM and non-T2DM  
5 patients; (3) depression could not be distinguished from anxiety or distress; (4) odds  
6 ratios (ORs) or risk ratios (RRs) could not be obtained or calculated, for example, we  
7 excluded studies that reported only mean and standard deviations of outcome  
8 measures.  
9  
10  
11  
12  
13

### 14 15 **Data collection and quality assessment**

16  
17 Two reviewers independently screened the titles and abstracts of eligible studies and  
18 extracted the data. Any disagreement was resolved by consensus. The following study  
19 characteristics were extracted: author, publication year, study design, country, sample  
20 size, mean or median age, proportion of males, depression diagnostic criteria,  
21 compared groups, and adjustment of effect estimates. Both of the unadjusted and  
22 adjusted effect estimates and 95% CIs were directly extracted or indirectly calculated.  
23 The degree of adjustment for confounders were categorized as: “+” for age and/or sex  
24 only; “++” for those with further adjusted for more than 2 standard sociobehavioral  
25 risk factors (i.e., education, race, marital status, insurance, exercise, occupation,  
26 smoking status, alcohol consumption, family history of diabetes, and BMI); “+++” for  
27 those with plus two or more clinical factors, including dyslipidemia, hypertension,  
28 cardiovascular disease, duration of T2DM, HbA1c level, treatment intensity, and  
29 diabetic complications. The quality was assessed by the modified Newcastle-Ottawa  
30 Scale (NOS) [27]. This scale awarded a maximum of eight points to each study, with  
31 six or less points indicating a high risk of bias.  
32  
33  
34  
35  
36  
37  
38  
39  
40  
41  
42  
43  
44  
45

### 46 **Statistical analysis**

47  
48 As most of the included studies were cross-sectional, effect sizes were expressed as  
49 ORs. Given the low prevalence of depression in T2DM patients, the RR reported by  
50 prospective study approximated the OR. Where available, the fully adjusted OR was  
51 pooled into meta-analysis to avoid the bias caused by confounding factors. However,  
52 the degree of adjustment and the variables entering into regression models varied  
53  
54  
55  
56  
57  
58  
59  
60

1  
2  
3 between the included studies. Thus, we additionally pooled the unadjusted ORs for  
4 data homogeneity. The random-effects model was used for meta-analysis.  
5 Heterogeneity was assessed by Cochran Q statistics and  $I^2$  values.  $P < 0.05$  was  
6 regarded as significant heterogeneity for Q test.  $I^2$  ranged between 0% (no  
7 heterogeneity) and 100% (high heterogeneity), with values around 25, 50, and 75%  
8 suggesting as low, moderate, and high heterogeneity [28]. To weigh up the relative  
9 influence of each individual study, sensitivity analysis was performed by excluding  
10 one study at a time and assessed the alteration in pooled results. Subgroup analyses  
11 and meta-regression analyses were performed using the following variables:  
12 compared groups (insulin vs. non-drug therapy or insulin vs. oral anti-diabetic drugs),  
13 degree of adjustment of confounders (+, ++ or +++), region (USA, Asia, Europe, or  
14 Africa), identification of depression (self-report questionnaire or medical records),  
15 sample size ( $\geq 1000$  or  $< 1000$ ), mean age ( $\geq 60$  or  $< 60$ ), percentage male ( $\geq 50$  or  $<$   
16 50), and NOS scale (7/8, or  $< 7$ ). Publication bias was assessed by Egger and Begg  
17 tests, with  $P < 0.05$  indicating significant asymmetry [29, 30]. Also, we visually  
18 inspected the funnel plot for publication bias. All analyses were conducted by the  
19 Stata software (version 12.0; StataCorp, College Station, TX). A P value of less than  
20 0.05 was considered to be significant.  
21  
22  
23  
24  
25  
26  
27  
28  
29  
30  
31  
32  
33  
34  
35  
36  
37  
38  
39

## 40 RESULTS

### 41 Study selection

42 A total of 2,102 records were identified including 595 articles from Pubmed, 836  
43 articles from PsycINFO, 359 articles from Embase, and 312 articles from Cochrane  
44 Library. We removed 461 duplicates. Further, 399 full-text articles were assessed for  
45 eligibility. After excluding 353 records with insufficient or irrelevant data, 46 studies  
46 were included into qualitative synthesis. We excluded 5 studies enrolling mixed type 1  
47 and type 2 diabetic patients, 3 studies comparing depression between DM and  
48 non-DM patients, 4 studies comparing the mean or median scores of depression  
49  
50  
51  
52  
53  
54  
55  
56  
57  
58  
59  
60

1  
2  
3 questionnaire, 4 studies reporting the regression or correlation coefficient, 1 study  
4 presenting a mixed outcome of depression and anxiety, and 2 studies reporting a  
5 mixed treatment regimen of insulin or oral drugs. Finally, 28 studies were included  
6 into the meta-analysis. The flow diagram was shown in Figure 1.  
7  
8  
9

### 10 11 **Study characteristics and quality assessment** 12

13  
14 Among the 28 studies pooled in the meta-analysis, except 1 prospective cohort [31],  
15 most of them were cross-sectional studies. A worldwide distribution was displayed,  
16 including 5 studies of USA, 8 European studies, 10 Asian studies, 2 African studies, 1  
17 South-American study, and 1 study mixed of South-American and European  
18 population. The sample size ranged from 90 to 229 047. The prevalence of depression  
19 ranged from 3.4 to 51.1%. Seven studies reported both the adjusted and unadjusted  
20 ORs [17, 20, 21, 32-35], 5 studies reported the adjusted ORs [31, 36-39], and  
21 unadjusted ORs were retrieved from 16 studies [18, 40-54]. Descriptive data of the  
22 included studies were summarized in Table 1. In quality assessment, all studies had  
23 low to moderate risk of bias, with scores ranging from 6 to 8. The items satisfied least  
24 were the control of confounding factors (12/28) and the report of response rates or  
25 follow-up data (10/28), (Table 2).  
26  
27  
28  
29  
30  
31  
32  
33  
34  
35  
36  
37  
38  
39  
40  
41  
42  
43  
44  
45  
46  
47  
48  
49  
50  
51  
52  
53  
54  
55  
56  
57  
58  
59  
60

1  
2  
3  
4  
5  
6  
7  
8  
9  
10  
11  
12  
13  
14  
15  
16  
17  
18  
19  
20  
21  
22  
23  
24  
25  
26  
27  
28  
29  
30  
31  
32  
33  
34  
35  
36  
37  
38  
39  
40  
41  
42  
43  
44  
45  
46  
47

**Table 1. Characteristics of included studies**

| Author (year)       | Design          | Study setting | No. of patients | Mean age, years | Country | Male, % | Depression prevalence, % | Depression assessment | Compared groups                                   | Source estimates | Adjusted factors                                                                                                                                                 |
|---------------------|-----------------|---------------|-----------------|-----------------|---------|---------|--------------------------|-----------------------|---------------------------------------------------|------------------|------------------------------------------------------------------------------------------------------------------------------------------------------------------|
| Katon et al. (2004) | Cross-sectional | Community     | 4193            | 65              | USA     | 51      | 20.5                     | PHQ-9                 | Insulin vs. non-drug                              | Adjusted         | Age, sex, education, marital status, employment, race, BMI and smoking, Rx Risk score, HbA1c, duration of diabetes, treatment intensity, number of complications |
| Bell et al. (2005)  | Cross-sectional | Community     | 696             | 74              | USA     | 50.7    | 15.8                     | CES-D                 | Insulin vs. oral medication; insulin vs. non-drug | Adjusted         | Age, sex, ethnicity, education, marital status, income, diabetes duration, number of medications, BMI, HbA1c, chronic conditions, PCS score                      |
| Ng et al.           | Hospital        | Hospital      | 204             | 53              | Korean  | 53      | 32.4                     | BDI                   | Insulin vs.                                       | Adjusted         | Age, sex, BMI, duration of                                                                                                                                       |

1  
2  
3  
4  
5  
6

|                        |                    |                                          |       |      |         |      |      |            |                          |                 |    |                                                                                                                                                            |
|------------------------|--------------------|------------------------------------------|-------|------|---------|------|------|------------|--------------------------|-----------------|----|------------------------------------------------------------------------------------------------------------------------------------------------------------|
| (2005)                 | l-based            |                                          |       |      |         |      |      |            |                          | oral medication |    | diabetes, HbA1c, occupation, education, marital status, family history of diabetes, hypertension, diabetic complications, cerebrovascular disease, IHD     |
| Hermanns et al. (2006) | Cross-sectional    | Hospital                                 | 236   | 52.2 | Germany | 60.6 | 33   | BDI; CES-D | Insulin vs. non-insulin  | Unadjusted      | NA |                                                                                                                                                            |
| Pawaskar et al. (2007) | Prospective cohort | Medicare Health Maintenance Organization | 792   | 72   | USA     | 44   | 17.3 | CES        | Insulin vs. sulfonylurea | Adjusted        |    | Age, sex, number of prescriptions, antidiabetic medication, perceived health status, health related quality of life, number of hospitalizations, ER visits |
| Li et al. (2008)       | Cross-sectional    | Surveillance Program                     | 16651 | ≥18  | USA     | 42   | 14.4 | PHQ        | Insulin vs. non-insulin  | Unadjusted      | NA |                                                                                                                                                            |

For peer review only

37  
38  
39  
40  
41  
42  
43  
44  
45  
46  
47

1  
2  
3  
4  
5  
6  
7  
8  
9  
10  
11  
12  
13  
14  
15  
16  
17  
18  
19  
20  
21  
22  
23  
24  
25  
26  
27  
28  
29  
30  
31  
32  
33  
34  
35  
36  
37  
38  
39  
40  
41  
42  
43  
44  
45  
46  
47

For peer review only

|                      |                 |          |      |      |                           |      |      |                 |                             |            |                                                                                                                                                                            |
|----------------------|-----------------|----------|------|------|---------------------------|------|------|-----------------|-----------------------------|------------|----------------------------------------------------------------------------------------------------------------------------------------------------------------------------|
| Ali et al. (2009)    | Cross-sectional | Hospital | 3845 | NA   | Mixed (South Asia and UK) | 52.8 | 9.3  | Medical records | Insulin vs. non-insulin     | Adjusted   | Age, gender, comorbidities, complications, insulin and oral anti-diabetic medication use, BMI, HbA1c, duration of diabetes, and deprivation                                |
| Raval et al. (2010)  | Cross-sectional | Hospital | 300  | 54   | India                     | 49   | 41   | PHQ-9           | Insulin vs. non-insulin     | Adjusted   | Age, gender, obesity, diabetic complications, blood pressure, duration of disease, income, education, BMI, HbA1c, diabetic complications, dyslipidemia, number of medicine |
| Zuberi et al. (2011) | Cross-sectional | Hospital | 286  | 52   | Pakistan                  | 39.2 | 50   | HADS            | Insulin vs. oral medication | Unadjusted | NA                                                                                                                                                                         |
| Stanković            | Cross-sectional | Hospital | 90   | 55.5 | Serbia                    | 34.4 | 51.1 | PHQ, BDI,       | Insulin vs.                 | Unadjusted | NA                                                                                                                                                                         |



1  
2  
3  
4  
5  
6  
7  
8  
9  
10  
11  
12  
13  
14  
15  
16  
17  
18  
19  
20  
21  
22  
23  
24  
25  
26  
27  
28  
29  
30  
31  
32  
33  
34  
35  
36  
37  
38  
39  
40  
41  
42  
43  
44  
45  
46  
47

|    |                      |          |            |     |      |          |      |      |              |                  |            |                                                                                               |
|----|----------------------|----------|------------|-----|------|----------|------|------|--------------|------------------|------------|-----------------------------------------------------------------------------------------------|
| 11 | et al. (2011)        | ectional |            |     |      |          |      |      | or interview | oral             |            |                                                                                               |
| 12 |                      |          |            |     |      |          |      |      |              | medication       |            |                                                                                               |
| 13 | Lynch et al. (2012)  | Cross-s  | Hospital   | 201 | NA   | USA      | 27.4 | 19.9 | CES-D        | Insulin          | Unadjusted | NA                                                                                            |
| 14 |                      | ectional |            |     |      |          |      |      |              | vs.non-insul     |            |                                                                                               |
| 15 |                      |          |            |     |      |          |      |      |              | in               |            |                                                                                               |
| 16 |                      |          |            |     |      |          |      |      |              |                  |            |                                                                                               |
| 17 | Osme et al. (2012)   | Cross-s  | Outpatient | 138 | ≥30  | Brazil   | 27.5 | 44.6 | HAD          | Insulin          | Unadjusted | NA                                                                                            |
| 18 |                      | ectional | clinic     |     |      |          |      |      |              | vs.non-insul     |            |                                                                                               |
| 19 |                      |          |            |     |      |          |      |      |              | in               |            |                                                                                               |
| 20 |                      |          |            |     |      |          |      |      |              |                  |            |                                                                                               |
| 21 |                      |          |            |     |      |          |      |      |              |                  |            |                                                                                               |
| 22 | Trento et al. (2012) | Cross-s  | Outpatient | 498 | 67.6 | Italy    | 52.6 | 14.2 | ZSDS         | Insulin          | Unadjusted | NA                                                                                            |
| 23 |                      | ectional | clinic     |     |      |          |      |      |              | vs.non-insul     |            |                                                                                               |
| 24 |                      |          |            |     |      |          |      |      |              | in               |            |                                                                                               |
| 25 |                      |          |            |     |      |          |      |      |              |                  |            |                                                                                               |
| 26 |                      |          |            |     |      |          |      |      |              |                  |            |                                                                                               |
| 27 |                      |          |            |     |      |          |      |      |              |                  |            |                                                                                               |
| 28 |                      |          |            |     |      |          |      |      |              |                  |            |                                                                                               |
| 29 |                      |          |            |     |      |          |      |      |              |                  |            |                                                                                               |
| 30 | Roy et al. (2012)    | Cross-s  | Outpatient | 417 | 53.2 | Banglade | 50.6 | 34   | PHQ-9        | Insulin vs. oral | Adjusted   | Age, gender, education, income, region, CVD, hypertension, diabetic complications, BMI, HbA1c |
| 31 |                      | ectional | clinic     |     |      | sh       |      |      |              | medication       |            |                                                                                               |
| 32 |                      |          |            |     |      |          |      |      |              | +diet;           |            |                                                                                               |

1  
2  
3  
4  
5  
6  
7  
8  
9  
10  
11  
12  
13  
14  
15  
16  
18  
20  
21  
22  
23  
24  
25  
26  
27  
28  
29  
30  
31  
32  
33  
34  
35  
36  
37  
38  
39  
40  
41  
42  
43  
44  
45  
46  
47

For peer review only

insulin+oral  
medication  
vs. oral  
medication  
+diet

Joseph et al. (2013) Cross-sectional Hospital 230 53.6 India 51.7 45.2 PHQ-9 Insulin vs. Unadjusted NA

oral  
medication

Hayashino et al. (2014) Cross-sectional Hospital 3573 66 Japan 61.1 3.4 PHQ-9 Insulin vs. Unadjusted NA

oral  
medication  
or diet

Gorska-Ciechanowska et al. (2014) Cross-sectional Outpatient clinic 276 74 Poland 46 29.7 GDS Insulin vs. Adjusted Age, sex, education,

oral  
medication

marital status, smoking, physical activity, duration

1  
2  
3  
4  
5  
6  
7  
8  
9  
10  
11  
12  
13  
14  
15  
16  
17  
18  
19  
20  
21  
22  
23  
24  
25  
26  
27  
28  
29  
30  
31  
32  
33  
34  
35  
36  
37  
38  
39  
40  
41  
42  
43  
44  
45  
46  
47

For peer review only

of diabetes, BMI, HbA1c, lipids  
levels, diabetic complications,  
previous HA or use of HA drugs,  
hyperlipidemia, number of  
comorbid conditions, hypoglycemia

|                                |                 |            |      |      |           |      |      |       |                             |            |                                                              |
|--------------------------------|-----------------|------------|------|------|-----------|------|------|-------|-----------------------------|------------|--------------------------------------------------------------|
| Sweileh et al. (2014)          | Cross-sectional | Hospital   | 294  | 60   | Palestine | 44.2 | 40.2 | BDI   | Insulin vs. non-insulin     | Unadjusted | NA                                                           |
| Yan Zhang et al. (2015)        | Cross-sectional | Hospital   | 2538 | 56.4 | China     | 53   | 6.1  | PHQ-9 | Insulin vs. oral drugs      | Unadjusted | NA                                                           |
| Rodríguez Calvin et al. (2015) | Cross-sectional | Hospital   | 275  | 64.5 | Spain     | 56.4 | 32.7 | BDI   | Insulin vs. oral medication | Unadjusted | NA                                                           |
| Camara et al.                  | Cross-sectional | Outpatient | 491  | 58   | Guinea    | 37   | 34.4 | HADS  | Insulin vs. oral            | Adjusted   | Age, HbA1c, hypertension, BMI, residence zone, socioeconomic |

1  
2  
3  
4  
5  
6  
7  
8  
9  
10  
11  
12  
13  
14  
15  
16  
17  
18  
19  
20  
21  
22  
23  
24  
25  
26  
27  
28  
29  
30  
31  
32  
33  
34  
35  
36  
37  
38  
39  
40  
41  
42  
43  
44  
45  
46  
47

For peer review only

|                    |                 |           |     |      |       |      |      |       |                        |                         |  |                                                                                                                                                                                |
|--------------------|-----------------|-----------|-----|------|-------|------|------|-------|------------------------|-------------------------|--|--------------------------------------------------------------------------------------------------------------------------------------------------------------------------------|
| al (2015)          | ectional        | clinic    |     |      |       |      |      |       |                        | medication              |  | status                                                                                                                                                                         |
| Sun et al. (2015)  | Cross-sectional | Community | 229 | 57.4 | China | 34.4 | 5.9  | PHQ-9 | Insulin vs. Adjusted   | oral medication or diet |  | Age, sex, BMI, HbA1c, smoking, alcohol, physical activity, education, occupation, marital status, selfreport cardio-metabolic disorders, diabetes treatment, diabetes duration |
| Wang et al. (2015) | Cross-sectional | Hospital  | 412 | 59.8 | China | 50.2 | 5.7  | BDI   | Insulin vs. Adjusted   | oral medication         |  | Age, gender, education, marital status, occupation, insurance, HbA1c, BMI, DM history, diabetic complications, duration of DM, smoking, alcohol, exercise, sleeping hours      |
| Li et al. (2015)   | Cross-sectional | Hospital  | 128 | 64.7 | Italy | 58.6 | 50.8 | HAM-D | Insulin vs. Unadjusted | oral medication         |  | NA                                                                                                                                                                             |

1  
2  
3  
4  
5  
6  
7  
8  
9  
10  
11  
12  
13  
14  
15  
16  
17  
18  
19  
20  
21  
22  
23  
24  
25  
26  
27  
28  
29  
30  
31  
32  
33  
34  
35  
36  
37  
38  
39  
40  
41  
42  
43  
44  
45  
46  
47

For peer review only

or diet

|                           |                 |           |       |      |          |      |      |                 |                              |            |                                                            |
|---------------------------|-----------------|-----------|-------|------|----------|------|------|-----------------|------------------------------|------------|------------------------------------------------------------|
| Kikuchi et al. (2015)     | Cross-sectional | Community | 4218  | 65.5 | Japan    | 57.1 | 10.6 | CES-D           | Insulin vs. non-insulin      | Unadjusted | NA                                                         |
| Jacob et al. (2016)       | Cross-sectional | Community | 90412 | 65.5 | Germany  | 50.2 | 30.3 | Medical records | Insulin vs. non-insulin      | Adjusted   | Age, gender, insurance, diabetic complications, CVD, HbA1c |
| Coils-Sagar et al. (2016) | Cross-sectional | Community | 411   | 70.8 | Spain    | 46.2 | 29.2 | PHQ-9           | Insulin vs. oral medications | Unadjusted | NA                                                         |
| Habtewold et al. (2016)   | Cross-sectional | Hospital  | 276   | 44   | Ethiopia | 47   | 44.7 | PHQ-9           | Insulin vs. oral medication  | Unadjusted | NA                                                         |

BDI, Beck Depression Inventory; BMI, body mass index; BG, blood glucose; CES-D, Center for Epidemiologic Studies Depression; DBP, diastolic blood pressure; ER, emergency room; GDS, Geriatric Depression Scale; HADS, Hospital Anxiety and Depression Scale; HAM-D, Hamilton rating scale for depression; IHD, ischemic heart disease; PCS, Physical Component Summary score; PHQ, Patient Health

1  
2  
3  
4  
5  
6  
7  
8  
9  
10  
11  
12  
13  
14  
15  
16  
17  
18  
19  
20  
21  
22  
23  
24  
25  
26  
27  
28  
29  
30  
31  
32  
33  
34  
35  
36  
37  
38  
39  
40  
41  
42  
43  
44  
45  
46  
47

Questionnaire; SBP, systolic blood pressure; ZSDS, Zung Self-Rating Depression Scale.

For peer review only

**Table 2. Quality assessment of included studies by the modified Newcastle-Ottawa scale (NOS)**

| Author (year)          | Adequate definition of cases using insulin | Representativeness of cases using insulin | Selection of the non-insulin users | Ascertainment of insulin use | Depression was not present before initiation | Control of confounding factors | Assessment of depression | Report of response or follow-up data | Total score |
|------------------------|--------------------------------------------|-------------------------------------------|------------------------------------|------------------------------|----------------------------------------------|--------------------------------|--------------------------|--------------------------------------|-------------|
| Katon et al. (2004)    | 1                                          | 1                                         | 1                                  | 1                            | 1                                            | 1                              | 1                        | 1                                    | 8           |
| Bell et al. (2005)     | 1                                          | 1                                         | 1                                  | 1                            | 1                                            | 1                              | 1                        | 0                                    | 7           |
| Noh et al. (2005)      | 1                                          | 0                                         | 1                                  | 1                            | 1                                            | 1                              | 1                        | 0                                    | 6           |
| Hermanns et al. (2006) | 1                                          | 1                                         | 1                                  | 1                            | 1                                            | 0                              | 1                        | 0                                    | 6           |
| Pawaskar et al. (2007) | 1                                          | 1                                         | 1                                  | 1                            | 1                                            | 1                              | 1                        | 1                                    | 7           |
| Li et al. (2008)       | 1                                          | 1                                         | 1                                  | 1                            | 1                                            | 0                              | 1                        | 0                                    | 6           |
| Ali et al. (2009)      | 1                                          | 1                                         | 1                                  | 1                            | 1                                            | 1                              | 1                        | 0                                    | 7           |
| Raval et al. (2010)    | 1                                          | 1                                         | 1                                  | 1                            | 1                                            | 1                              | 1                        | 0                                    | 7           |

|    |                                |   |   |   |   |   |   |   |   |   |
|----|--------------------------------|---|---|---|---|---|---|---|---|---|
| 1  |                                |   |   |   |   |   |   |   |   |   |
| 2  |                                |   |   |   |   |   |   |   |   |   |
| 3  |                                |   |   |   |   |   |   |   |   |   |
| 4  |                                |   |   |   |   |   |   |   |   |   |
| 5  |                                |   |   |   |   |   |   |   |   |   |
| 6  |                                |   |   |   |   |   |   |   |   |   |
| 7  | Zuberi et al. (2011)           | 1 | 1 | 1 | 1 | 1 | 0 | 1 | 1 | 7 |
| 8  |                                |   |   |   |   |   |   |   |   |   |
| 9  | Stanković et al. (2011)        | 1 | 1 | 1 | 1 | 1 | 0 | 1 | 0 | 6 |
| 10 |                                |   |   |   |   |   |   |   |   |   |
| 11 |                                |   |   |   |   |   |   |   |   |   |
| 12 | Lynch et al. (2012)            | 1 | 1 | 1 | 1 | 1 | 0 | 1 | 1 | 7 |
| 13 |                                |   |   |   |   |   |   |   |   |   |
| 14 |                                |   |   |   |   |   |   |   |   |   |
| 15 | Osme et al. (2012)             | 1 | 1 | 1 | 1 | 1 | 0 | 1 | 0 | 6 |
| 16 |                                |   |   |   |   |   |   |   |   |   |
| 17 | Trento et al. (2012)           | 1 | 1 | 1 | 1 | 1 | 0 | 1 | 0 | 6 |
| 18 |                                |   |   |   |   |   |   |   |   |   |
| 19 |                                |   |   |   |   |   |   |   |   |   |
| 20 | Roy et al. (2012)              | 1 | 1 | 1 | 1 | 1 | 1 | 1 | 1 | 8 |
| 21 |                                |   |   |   |   |   |   |   |   |   |
| 22 |                                |   |   |   |   |   |   |   |   |   |
| 23 | Joseph et al. (2013)           | 1 | 1 | 1 | 1 | 1 | 0 | 1 | 0 | 6 |
| 24 |                                |   |   |   |   |   |   |   |   |   |
| 25 | Hayashino et al. (2014)        | 1 | 1 | 1 | 1 | 1 | 0 | 1 | 0 | 6 |
| 26 |                                |   |   |   |   |   |   |   |   |   |
| 27 |                                |   |   |   |   |   |   |   |   |   |
| 28 | Gorska-Ciebiada et al. (2014)  | 0 | 1 | 1 | 1 | 1 | 1 | 1 | 0 | 6 |
| 29 |                                |   |   |   |   |   |   |   |   |   |
| 30 |                                |   |   |   |   |   |   |   |   |   |
| 31 | Sweileh et al. (2014)          | 1 | 1 | 1 | 1 | 1 | 0 | 1 | 1 | 7 |
| 32 |                                |   |   |   |   |   |   |   |   |   |
| 33 | YY Zhang et al. (2015)         | 1 | 1 | 1 | 1 | 1 | 0 | 1 | 1 | 7 |
| 34 |                                |   |   |   |   |   |   |   |   |   |
| 35 |                                |   |   |   |   |   |   |   |   |   |
| 36 | Rodriguez Calvin et al. (2015) | 1 | 1 | 1 | 1 | 1 | 0 | 1 | 1 | 7 |
| 37 |                                |   |   |   |   |   |   |   |   |   |

For peer review only



1  
2  
3  
4  
5  
6  
7  
8  
9  
10  
11  
12  
13  
14  
15  
16  
17  
18  
19  
20  
21  
22  
23  
24  
25  
26  
27  
28  
29  
30  
31  
32  
33  
34  
35  
36  
37  
38  
39  
40  
41  
42  
43  
44  
45  
46  
47

|    |                            |   |   |   |   |   |   |   |   |   |
|----|----------------------------|---|---|---|---|---|---|---|---|---|
| 7  | Camara et al. (2015)       | 1 | 1 | 1 | 1 | 1 | 0 | 1 | 0 | 6 |
| 9  | Sun et al. (2015)          | 1 | 1 | 1 | 1 | 1 | 1 | 1 | 0 | 7 |
| 12 | WJ Zhang et al. (2015)     | 1 | 1 | 1 | 1 | 1 | 1 | 1 | 1 | 8 |
| 15 | Luca et al. (2015)         | 1 | 1 | 1 | 1 | 1 | 0 | 1 | 0 | 6 |
| 17 | Kikuchi et al. (2015)      | 1 | 1 | 1 | 1 | 1 | 0 | 1 | 0 | 6 |
| 20 | Jacob et al. (2016)        | 1 | 1 | 1 | 1 | 1 | 0 | 1 | 0 | 6 |
| 22 | Cols-Sagarra et al. (2016) | 1 | 1 | 1 | 1 | 1 | 0 | 1 | 0 | 6 |
| 25 | Habtewold et al. (2016)    | 1 | 1 | 1 | 1 | 1 | 0 | 1 | 1 | 7 |

### Meta-analysis of adjusted data

The adjusted ORs for comparison of depression between insulin and non-insulin treated patients were reported by 12 studies. Compared with non-insulin treatment, insulin therapy was associated with a significantly higher risk of depression (OR = 1.41, 95% CI 1.13-1.76, P = 0.003). Significantly high heterogeneity was revealed ( $I^2 = 69.7\%$ , P < 0.001) (Figure 2).

The results of sensitivity analysis, which was done by excluding one by one study, might vary when several included studies were excluded (Supplementary Figure S1). To identify the sources of heterogeneity, we performed subgroup analyses based on several important confounding factors. Six studies particularly compared insulin with oral anti-diabetic drugs, and showed that insulin therapy was significantly associated with increased risk of depression (OR = 1.42, 95% CI 1.08-1.86, P = 0.008). Two studies that compared insulin with non-drug therapy showed no significant association for insulin and depression (OR = 0.87, 95% CI 0.37-2.03, P = .745). Additionally, we conducted a subgroup analysis based on the degree of adjustment of confounders, region, identification of depression, sample size, mean age, percentage male, and NOS scale. The association was significant for the subgroups of fully adjustment (+++), Asian studies, self-report questionnaires, sample size  $\geq 1000$ , mean age < 60.0 years, percentage of male < 50.0%, prevalence of depression over 20%, and NOS scale < 6 (Table 3). Meta-regression analyses indicated a lack of effect measure modification by sample size (P = 0.93), mean age (P = 0.17), percentage male (P = 0.28) or prevalence of depression (P = 0.75).

**Table 3. Subgroup analyses for the studies reporting adjusted effect estimates**

| Subgroups              | No. of studies | OR (95% CI) | P value | $I^2$ | P value for within-stratum heterogeneity | P value for between-stratum heterogeneity |
|------------------------|----------------|-------------|---------|-------|------------------------------------------|-------------------------------------------|
| <b>Compared groups</b> |                |             |         |       |                                          |                                           |

|                                     |    |                  |       |       |       |      |
|-------------------------------------|----|------------------|-------|-------|-------|------|
| Insulin vs. oral drugs              | 6  | 1.42 (1.08-1.86) | <0.05 | 71.3% | <0.05 | 0.28 |
| Insulin vs. non-drugs               | 2  | 0.87 (0.37-2.03) | >0.05 | 66.5% | 0.08  |      |
| <b>Degree of adjustment</b>         |    |                  |       |       |       |      |
| +++                                 | 10 | 1.43 (1.08-1.89) | <0.05 | 68.9% | <0.05 | 0.44 |
| ++                                  | 2  | 1.24 (0.98-1.55) | >0.05 | 25.3% | 0.25  |      |
| <b>Region</b>                       |    |                  |       |       |       |      |
| USA                                 | 4  | 0.86 (0.57-1.31) | >0.05 | 36.4% | 0.19  | 0.12 |
| Asia                                | 5  | 1.81 (1.18-2.79) | <0.05 | 59%   | 0.05  |      |
| Europe                              | 2  | 1.58 (0.85-2.94) | >0.05 | 92.9% | <0.05 |      |
| Africa                              | 1  | 1.53 (0.99-2.37) | >0.05 | -     | -     |      |
| <b>Identification of depression</b> |    |                  |       |       |       |      |
| Self-report questionnaire           | 10 | 1.42 (1.06-1.91) | <0.05 | 68.9% | <0.05 | 0.69 |
| Medical records                     | 2  | 1.31 (1.00-1.71) | >0.05 | 65.6% | 0.09  |      |
| <b>Sample size</b>                  |    |                  |       |       |       |      |
| ≥ 1000                              | 4  | 1.46 (1.10-1.94) | <0.05 | 73.1% | <0.05 | 0.72 |
| < 1000                              | 8  | 1.34 (0.93-1.93) | >0.05 | 70%   | <0.05 |      |
| <b>Mean age</b>                     |    |                  |       |       |       |      |
| ≥ 60.0                              | 5  | 1.12 (0.77-1.62) | >0.05 | 78.8% | <0.05 | 0.08 |

|                                 |   |                  |       |       |       |      |
|---------------------------------|---|------------------|-------|-------|-------|------|
| < 60.0                          | 6 | 1.74 (1.24-2.43) | <0.05 | 50.8% | 0.07  |      |
| <b>Percentage male (%)</b>      |   |                  |       |       |       |      |
| ≥ 50.0                          | 7 | 1.26 (0.97-1.63) | >0.05 | 62.4% | <0.05 | 0.14 |
| < 50.0                          | 5 | 1.71 (1.25-2.35) | <0.05 | 53.9% | 0.07  |      |
| <b>Prevalence of depression</b> |   |                  |       |       |       |      |
| ≥ 20%                           | 7 | 1.48 (1.12-1.96) | <0.05 | 71.3% | <0.05 | 0.53 |
| < 20%                           | 5 | 1.25 (0.80-1.95) | >0.05 | 72.7% | <0.05 |      |
| <b>NOS scale</b>                |   |                  |       |       |       |      |
| 7 or 8                          | 8 | 1.25 (0.94-1.66) | >0.05 | 60.0% | <0.05 | 0.19 |
| <7                              | 4 | 1.79 (1.14-2.80) | <0.05 | 84.6% | <0.05 |      |

### Meta-analysis of unadjusted results

Twenty-four studies provided the crude data. All studies were cross-sectional, and assessed depression by self-report scales. The studies presented three comparison types (insulin vs. non-drug therapy; insulin vs. oral anti-diabetic drugs; and insulin vs. non-insulin treatment). Data that compared insulin and non-insulin therapy were preferred. The pooled results showed that T2DM patients on insulin therapy was associated with an increased risk of depression compared with those on non-insulin treatment (OR = 1.59, 95% CI 1.41-1.80, P < 0.001) (Figure 3). The heterogeneity was at a significantly higher level ( $I^2 = 59.8\%$ , P < 0.001). Sensitivity analysis revealed no significant variation in the pooled OR by exclusion of any included study (Supplementary Figure S2).

Seventeen studies compared insulin with oral anti-diabetic drugs, and showed a significant association for the risk of depression (OR = 1.61, 95% CI 1.35-1.93,  $P < 0.001$ ). For 6 studies that compared insulin use with non-drug treatment, insulin use was associated with an increased risk of depression (OR = 1.89, 95% CI 1.25-2.88,  $P = 0.002$ ). In stratified analyses based on the degree of adjustment of confounders, region, identification of depression, sample size, mean age, percentage male, and NOS scale, there was a significant association between insulin use and depression among all subgroups except the study conducted in South America (Table 4). In meta-regression analyses, sample size ( $P = 0.79$ ), mean age ( $P = 0.56$ ), percentage male ( $P = 0.80$ ), and the prevalence of depression ( $P = 0.68$ ) demonstrated no independent effect on the depression outcomes.

**Table 4. Subgroup analyses for the studies reporting the crude effect estimates**

| Subgroups              | No. of studies | OR (95% CI)      | P value | I <sup>2</sup> (P value) | P value for within-stratum heterogeneity | P value for between-stratum heterogeneity |
|------------------------|----------------|------------------|---------|--------------------------|------------------------------------------|-------------------------------------------|
| <b>Compared groups</b> |                |                  |         |                          |                                          |                                           |
| Insulin vs. oral drugs | 17             | 1.61 (1.35-1.93) | <0.05   | 62.6%                    | <0.05                                    | 0.49                                      |
| Insulin vs. non-drugs  | 6              | 1.89 (1.25-2.88) | <0.05   | 68.2%                    | <0.05                                    |                                           |
| <b>Region</b>          |                |                  |         |                          |                                          |                                           |
| USA                    | 4              | 1.53 (1.21-1.93) | <0.05   | 75.4%                    | <0.05                                    | 0.31                                      |
| Asia                   | 9              | 1.60 (1.22-2.10) | <0.05   | 75.4%                    | 0.05                                     |                                           |
| Europe                 | 7              | 1.59 (1.13-2.22) | <0.05   | 45.3%                    | <0.05                                    |                                           |
| Africa                 | 2              | 1.77 (1.23-2.54) | <0.05   | 0.0                      | 0.85                                     |                                           |

|                                 |    |                   |       |       |       |       |
|---------------------------------|----|-------------------|-------|-------|-------|-------|
| South America                   | 1  | 1.28 (0.50-3.27)  | >0.05 | -     | -     |       |
| <b>Sample size</b>              |    |                   |       |       |       |       |
| ≥1000                           | 7  | 1.64 (1.39-1.93)  | <0.05 | 77.5% | <0.05 | 0.71  |
| < 1000                          | 17 | 1.56 (1.27-1.91)  | <0.05 | 46.7% | <0.05 |       |
| <b>Mean age</b>                 |    |                   |       |       |       |       |
| ≥ 60.0                          | 10 | 1.60 (1.30-1.97)  | <0.05 | 61.8% | <0.05 | 0.92  |
| < 60.0                          | 10 | 1.57 (1.18-2.09)  | <0.05 | 68.0% | <0.05 |       |
| <b>Percentage male</b>          |    |                   |       |       |       |       |
| <b>(%)</b>                      |    |                   |       |       |       |       |
| ≥ 50.0                          | 13 | 1.59 (1.29-1.96)  | <0.05 | 75.1% | <0.05 | 0.82  |
| < 50.0                          | 11 | 1.55 (1.43-1.68)  | <0.05 | 0.0   | 0.71  |       |
| <b>Prevalence of depression</b> |    |                   |       |       |       |       |
| ≥ 20%                           | 14 | 1.84 (1.59-2.12)  | <0.05 | 11.7% | 0.33  | <0.05 |
| < 20%                           | 10 | 1.43 (1.19 -1.70) | <0.05 | 74.0% | <0.05 |       |
| <b>NOS scale</b>                |    |                   |       |       |       |       |
| 7 or 8                          | 11 | 1.45 (1.16-1.82)  | <0.05 | 72.3% | <0.05 | 0.22  |
| <7                              | 13 | 1.72 (1.47-2.00)  | <0.05 | 42.8% | 0.05  |       |

### Publication bias

For studies reporting the adjusted ORs, the funnel plot was symmetrical (Figure 4).

No publication bias was shown by the Egger test (P = 0.94) or Begg's test (P = 0.67).

1  
2  
3 For studies presenting the crude ORs, the funnel plot was symmetrical (Figure 5). We  
4 did not detect publication bias by Egger ( $P = 0.39$ ) or Begg test ( $P = 0.94$ ).  
5  
6  
7  
8  
9

## 10 **DISCUSSION**

11  
12 This is the first meta-analysis that estimated the magnitude of association between  
13 insulin therapy and depression. The pooled data of adjusted ORs proved that T2DM  
14 patients on insulin treatment were associated with the prevalence of depressive  
15 syndromes compared to those without insulin therapy. When pooling the crude ORs,  
16 the results showed a permanent and significant association. We specifically compared  
17 insulin use with oral-antidiabetic drugs. Both of the adjusted data ( $OR = 1.42$ ) and the  
18 unadjusted data ( $OR = 1.61$ ) showed that insulin users were related to the greater risk  
19 of depression.  
20  
21  
22  
23  
24  
25  
26

27  
28 The source of heterogeneity was explored carefully. In sensitivity analysis, no  
29 substantial change in heterogeneity was revealed when excluding any individual study,  
30 suggesting the homogeneity of the pooled effect estimates. The prevalence of  
31 depression could be different according to different ethnicities [55]. In subgroup  
32 analyses of adjusted data, we found significant results for Asian studies.  
33 Non-significant results were shown for studies with sample size below 1000,  
34 suggesting that the results were unstable for small sample size. Substantial change of  
35 heterogeneity was also detected for subgroups of insufficient degree of adjustment  
36 and depression identified by medical records. However, the number of eligible studies  
37 was rather small to draw firm conclusions. For studies with the prevalence of  
38 depression below 20%, substantial change in the effect estimates was observed for  
39 adjusted data, and obvious change in heterogeneity for crude data. Thus, this may  
40 partly account for the heterogeneity. Finally, significant association was detected if  
41 the mean age was  $<60.0$  years, percentage male  $< 50.0\%$ , and NOS  $< 7$  for adjusted  
42 data. This might be due to that the younger patients were associated with higher  
43  
44  
45  
46  
47  
48  
49  
50  
51  
52  
53  
54  
55  
56  
57  
58  
59  
60

1  
2  
3 prevalence of depression, and women receiving insulin therapy might be under greater  
4 risk of depression compared to men.  
5  
6

7  
8 The mechanisms that link diabetes and depression were complex and still unclear.  
9 Depression and T2DM could develop in parallel through shared biological processes.  
10 The involved pathways include the innate inflammatory response, the  
11 hypothalamic-pituitary-adrenal axis, circadian rhythms, and insulin resistance [3].  
12 Although the overall prevalence of depression is high in diabetic patients, the  
13 DESMOND trial reported that it was not so in the newly diagnosed T2DM patients  
14 [56]. Screen-detected patients with T2DM showed low distress and anxiety at the time  
15 of diagnosis, with a significant increase during the 12 months follow-up period [57].  
16 In accordance with these findings, we confirmed that insulin therapy was associated  
17 with increased prevalence of depression. For patients on insulin therapy, they had less  
18 endogenous insulin and were therefore more susceptible to metabolic dysregulation  
19 than patients who might have some residual insulin secretory activity. Especially,  
20 patients who are more metabolically labile are more vulnerable to depression [16].  
21 Besides, insulin therapy is always a symbol of more advanced type 2 diabetes. The  
22 patients' negative attitude towards insulin therapy may contribute to the delay for  
23 insulin initiation, prolonged duration of hyperglycemia, and increased risk of diabetic  
24 complications [58]. Psychological insulin resistance (PIR) has been defined as  
25 psychological opposition towards insulin treatment in both diabetic patients and their  
26 prescribers. They may display fear of insulin injection and self-testing, complex  
27 regimen, hypoglycemia, and weight gain; a perceived loss of control over one's life;  
28 poor self-efficacy concerning insulin treatment; and lack of positive outcomes related  
29 to insulin [58-60]. These psychological aspects may explain the increased risk of  
30 depression when insulin was prescribed.  
31  
32  
33  
34  
35  
36  
37  
38  
39  
40  
41  
42  
43  
44  
45  
46  
47  
48  
49

50  
51 The primary strength of this study was the systematic and expansive search of  
52 multiple databases, which minimized the risk of missing data. The meta-analysis  
53 identified 28 studies that enrolled worldwide-distributed participants. Both the  
54 adjusted and crude effect estimates were analyzed and demonstrated consistent results.  
55  
56  
57



1  
2  
3 The confidential intervals were narrow, suggesting the precision of pooled results [61].  
4  
5 For adjusted data, most of the studies had full adjustment for confounders. The  
6  
7 subtypes of non-insulin therapy, including oral drug and non-drug treatment, were  
8  
9 analyzed separately. The between-study heterogeneity was intensively explored by  
10  
11 sensitivity, subgroup, and meta-regression analyses. Besides, no publication bias was  
12  
13 detected among the selected studies.  
14

15 We were aware of the limitations of this meta-analysis. Our findings mainly  
16  
17 relied on cross-sectional data; and as such, the causal and temporal relationship  
18  
19 between insulin use and depression could not be established. Some studies have small  
20  
21 sample size, which may influence the statistical power. Several studies have reported  
22  
23 the response rates. The unmeasured differences between respondents and  
24  
25 nonrespondents may potentially influence the pooled results. Most of the studies used  
26  
27 self-reported scales rather than clinical interview-based assessments to identify  
28  
29 depression. Prevalence of depression was generally much higher using the  
30  
31 self-reported scales than standardized diagnostic interviews [20, 62]. Furthermore, the  
32  
33 findings of insulin therapy versus specific oral drugs and the prevalence of depression  
34  
35 were not illustrated due to inclusion of less number of studies in each subset.  
36  
37 Moreover, background oral anti-diabetic drug uses in insulin group might affect the  
38  
39 association of insulin use with the risk of depressive syndromes, while this  
40  
41 information was not available in most of the included studies. In addition, although  
42  
43 subgroup analyses based on several factors were conducted, substantial residual  
44  
45 heterogeneity was observed in numerous subsets. These results were restricted due to  
46  
47 uncontrolled baseline characteristics of included patients and studies. Finally, the  
48  
49 impact of the total number of daily insulin injections with depression development  
50  
51 was included only in few studies, and these contributed as potential confounders in  
52  
53 patients who received insulin therapy and with progression of depression.  
54

## 55 CONCLUSIONS

1  
2  
3 In conclusion, type 2 diabetic patients who were prescribed insulin were associated  
4 with depressive syndromes. For insulin-users, careful monitoring of depressive  
5 symptoms should be incorporated in the disease management. Intensified  
6 psychological and education programs should be carried out to prevent depressive  
7 illness after insulin initiation in the primary care settings.  
8  
9  
10  
11  
12  
13  
14  
15  
16  
17  
18  
19  
20  
21  
22  
23  
24  
25  
26  
27  
28  
29  
30  
31  
32  
33  
34  
35  
36  
37  
38  
39  
40  
41  
42  
43  
44  
45  
46  
47  
48  
49  
50  
51  
52  
53  
54  
55  
56  
57  
58  
59  
60

For peer review only

## Acknowledgments

None.

## Funding

This research received no specific grant from any funding agency in the public, commercial or not-for-profit sectors.

## Conflict of interest

The authors declare that they have no competing interests.

## Authors' contributions

XSB contributed to study concepts, manuscript preparation, literature research and drafting the manuscript. ZML, ZSL and DWY carried out literature research, data analysis and revising the manuscript for important content. All authors read and approved the final manuscript.

## Data sharing statement

No additional data available.

## References

- 1 Tabak AG, Akbaraly TN, Batty GD, et al. Depression and type 2 diabetes: a causal association? *Lancet Diabetes Endocrinol* 2014;2:236-45.
- 2 Type 2 Diabetes in Adults: Management. National Institute for Health and Care Excellence: Clinical Guidelines. London 2015.
- 3 Moulton CD, Pickup JC, Ismail K. The link between depression and diabetes: the search for shared mechanisms. *Lancet Diabetes Endocrinol* 2015;3:461-71.
- 4 Mezuk B, Eaton WW, Albrecht S, et al. Depression and type 2 diabetes over the lifespan: a meta-analysis. *Diabetes Care* 2008;31:2383-90.
- 5 Nouwen A, Winkley K, Twisk J, et al. Type 2 diabetes mellitus as a risk factor for the onset of depression: a systematic review and meta-analysis. *Diabetologia* 2010;53:2480-6.
- 6 van Dooren FE, Nefs G, Schram MT, et al. Depression and risk of mortality in people with diabetes mellitus: a systematic review and meta-analysis. *PLoS One* 2013;8:e57058.
- 7 Kan C, Silva N, Golden SH, et al. A systematic review and meta-analysis of the association between depression and insulin resistance. *Diabetes Care* 2013;36:480-9.
- 8 Ismail-Beigi F. Clinical practice. Glycemic management of type 2 diabetes mellitus. *N Engl J Med* 2012;366:1319-27.
- 9 Ohn JH, Kwak SH, Cho YM, et al. 10-year trajectory of beta-cell function and insulin sensitivity in the development of type 2 diabetes: a community-based prospective cohort study. *Lancet Diabetes Endocrinol* 2016;4:27-34.
- 10 Cahn A, Miccoli R, Dardano A, et al. New forms of insulin and insulin therapies for the treatment of type 2 diabetes. *Lancet Diabetes Endocrinol* 2015;3:638-52.
- 11 Home P, Riddle M, Cefalu WT, et al. Insulin therapy in people with type 2

1  
2  
3 diabetes: opportunities and challenges? *Diabetes Care* 2014;37:1499-508.

4  
5  
6 12 Weng J, Li Y, Xu W, et al. Effect of intensive insulin therapy on beta-cell function  
7 and glycaemic control in patients with newly diagnosed type 2 diabetes: a multicentre  
8 randomised parallel-group trial. *Lancet* 2008;371:1753-60.

9  
10  
11  
12 13 Kramer CK, Zinman B, Retnakaran R. Short-term intensive insulin therapy in  
14 type 2 diabetes mellitus: a systematic review and meta-analysis. *Lancet Diabetes*  
15 *Endocrinol* 2013;1:28-34.

16  
17  
18 14 Holman RR, Paul SK, Bethel MA, et al. 10-year follow-up of intensive glucose  
19 control in type 2 diabetes. *N Engl J Med* 2008;359:1577-89.

20  
21  
22  
23 15 Holmes-Truscott E, Skinner TC, Pouwer F, et al. Explaining psychological  
24 insulin resistance in adults with non-insulin-treated type 2 diabetes: The roles of  
25 diabetes distress and current medication concerns. Results from Diabetes  
26 MILES-Australia. *Prim Care Diabetes* 2016;10:75-82.

27  
28  
29  
30  
31 16 Surwit RS, van Tilburg MA, Parekh PI, et al. Treatment regimen determines the  
32 relationship between depression and glycemic control. *Diabetes Res Clin Pract*  
33 2005;69:78-80.

34  
35  
36  
37 17 Noh JH, Park JK, Lee HJ, et al. Depressive symptoms of type 2 diabetics treated  
38 with insulin compared to diabetics taking oral anti-diabetic drugs: a Korean study.  
39 *Diabetes Res Clin Pract* 2005;69:243-8.

40  
41  
42  
43 18 Li C, Ford ES, Strine TW, et al. Prevalence of depression among U.S. adults with  
44 diabetes: findings from the 2006 behavioral risk factor surveillance system. *Diabetes*  
45 *Care* 2008;31:105-7.

46  
47  
48  
49 19 Al-Amer RM, Sobeh MM, Zayed AA, et al. Depression among adults with  
50 diabetes in Jordan: risk factors and relationship to blood sugar control. *J Diabetes*  
51 *Complications* 2011;25:247-52.

52  
53  
54  
55  
56 20 Bell RA, Smith SL, Arcury TA, et al. Prevalence and correlates of depressive

1  
2  
3 symptoms among rural older African Americans, Native Americans, and whites with  
4 diabetes. *Diabetes Care* 2005;28:823-9.

6  
7  
8 21 Katon W, von Korff M, Ciechanowski P, et al. Behavioral and clinical factors  
9 associated with depression among individuals with diabetes. *Diabetes Care*  
10 2004;27:914-20.

12  
13  
14 22 Mikailiukstiene A, Juozulynas A, Narkauskaite L, et al. Quality of life in relation  
15 to social and disease factors in patients with type 2 diabetes in Lithuania. *Med Sci*  
16 *Monit* 2013;19:165-74.

18  
19  
20 23 Stroup DF, Berlin JA, Morton SC, et al. Meta-analysis of observational studies in  
21 epidemiology: a proposal for reporting. Meta-analysis Of Observational Studies in  
22 Epidemiology (MOOSE) group. *JAMA* 2000;283:2008-12.

24  
25  
26 24 Smarr KL, Keefer AL. Measures of depression and depressive symptoms: Beck  
27 Depression Inventory-II (BDI-II), Center for Epidemiologic Studies Depression Scale  
28 (CES-D), Geriatric Depression Scale (GDS), Hospital Anxiety and Depression Scale  
29 (HADS), and Patient Health Questionnaire-9 (PHQ-9). *Arthritis Care Res (Hoboken)*  
30 2011;63 Suppl 11:S454-66.

32  
33  
34 25 Organization WH. The ICD-10 classification of mental and behavioural disorders:  
35 clinical descriptions and diagnostic guidelines: Geneva: World Health Organization  
36 1992.

38  
39  
40 26 Association D-AP. Diagnostic and statistical manual of mental disorders.  
41 Arlington: American Psychiatric Publishing 2013.

42  
43  
44 27 Wells GA, Shea B, D OC. The Newcastle-Ottawa Scale (NOS) for assessing the  
45 quality of nonrandomised studies in meta-analyses.  
46 [http://www.ohrica/programs/clinical\\_epidemiology/oxfordasp](http://www.ohrica/programs/clinical_epidemiology/oxfordasp) (accessed April 27,  
47 2016) 2008.

48  
49  
50 28 Higgins JP, Thompson SG, Deeks JJ, et al. Measuring inconsistency in

1  
2  
3 meta-analyses. *BMJ* 2003;327:557-60.

4  
5  
6 29 Begg CB, Mazumdar M. Operating characteristics of a rank correlation test for  
7 publication bias. *Biometrics* 1994;50:1088-101.

8  
9  
10 30 Egger M, Davey Smith G, Schneider M, et al. Bias in meta-analysis detected by a  
11 simple, graphical test. *BMJ* 1997;315:629-34.

12  
13  
14 31 Pawaskar MD, Anderson RT, Balkrishnan R. Self-reported predictors of  
15 depressive symptomatology in an elderly population with type 2 diabetes mellitus: a  
16 prospective cohort study. *Health Qual Life Outcomes* 2007;5:50.

17  
18  
19 32 Zhang W, Xu H, Zhao S, et al. Prevalence and influencing factors of co-morbid  
20 depression in patients with type 2 diabetes mellitus: a General Hospital based study.  
21 *Diabetol Metab Syndr* 2015;7:60.

22  
23  
24 33 Ali S, Davies MJ, Taub NA, et al. Prevalence of diagnosed depression in South  
25 Asian and white European people with type 1 and type 2 diabetes mellitus in a UK  
26 secondary care population. *Postgrad Med J* 2009;85:238-43.

27  
28  
29 34 Gorska-Ciebiada M, Saryusz-Wolska M, Ciebiada M, et al. Mild cognitive  
30 impairment and depressive symptoms in elderly patients with diabetes: prevalence,  
31 risk factors, and comorbidity. *J Diabetes Res* 2014;2014:179648.

32  
33  
34 35 Camara A, Balde NM, Enoru S, et al. Prevalence of anxiety and depression  
35 among diabetic African patients in Guinea: association with HbA1c levels. *Diabetes*  
36 *Metab* 2015;41:62-8.

37  
38  
39 36 Raval A, Dhanaraj E, Bhansali A, et al. Prevalence & determinants of depression  
40 in type 2 diabetes patients in a tertiary care centre. *Indian J Med Res*  
41 2010;132:195-200.

42  
43  
44 37 Roy T, Lloyd CE, Parvin M, et al. Prevalence of co-morbid depression in  
45 out-patients with type 2 diabetes mellitus in Bangladesh. *BMC Psychiatry*  
46 2012;12:123.

1  
2  
3 38 Jacob L, Kostev K. Prevalence of depression in type 2 diabetes patients in  
4 German primary care practices. *J Diabetes Complications* 2016;30:432-7.  
5

6  
7 39 Sun JC, Xu M, Lu JL, et al. Associations of depression with impaired glucose  
8 regulation, newly diagnosed diabetes and previously diagnosed diabetes in Chinese  
9 adults. *Diabet Med* 2015;32:935-43.  
10  
11

12  
13 40 Hermanns N, Kulzer B, Krichbaum M, et al. How to screen for depression and  
14 emotional problems in patients with diabetes: comparison of screening characteristics  
15 of depression questionnaires, measurement of diabetes-specific emotional problems  
16 and standard clinical assessment. *Diabetologia* 2006;49:469-77.  
17  
18  
19

20  
21 41 Stankovic Z, Jasovic-Gasic M, Zamaklar M. Psycho-social and clinical variables  
22 associated with depression in patients with type 2 diabetes. *Psychiatr Danub*  
23 2011;23:34-44.  
24  
25  
26

27  
28 42 Zuberi SI, Syed EU, Bhatti JA. Association of depression with treatment  
29 outcomes in Type 2 Diabetes Mellitus: a cross-sectional study from Karachi, Pakistan.  
30 *BMC Psychiatry* 2011;11:27.  
31  
32  
33

34  
35 43 Lynch CP, Hernandez-Tejada MA, Strom JL, et al. Association between  
36 spirituality and depression in adults with type 2 diabetes. *Diabetes Educ*  
37 2012;38:427-35.  
38  
39  
40

41 44 Osme SF, Ferreira L, Jorge MT, et al. Difference between the prevalence of  
42 symptoms of depression and anxiety in non-diabetic smokers and in patients with type  
43 2 diabetes with and without nicotine dependence. *Diabetol Metab Syndr* 2012;4:39.  
44  
45  
46

47 45 Trento M, Raballo M, Trevisan M, et al. A cross-sectional survey of depression,  
48 anxiety, and cognitive function in patients with type 2 diabetes. *Acta Diabetol*  
49 2012;49:199-203.  
50  
51  
52

53 46 Joseph N, Unnikrishnan B, Raghavendra Babu YP, et al. Proportion of depression  
54 and its determinants among type 2 diabetes mellitus patients in various tertiary care  
55  
56  
57



1  
2  
3 hospitals in Mangalore city of South India. *Indian J Endocrinol Metab*  
4 2013;17:681-8.

5  
6  
7 47 Hayashino Y, Mashitani T, Tsujii S, et al. Elevated Levels of hs-CRP Are  
8 Associated With High Prevalence of Depression in Japanese Patients With Type 2  
9 Diabetes: The Diabetes Distress and Care Registry at Tenri (DDCRT 6). *Diabetes*  
10 *Care* 2014;37:2459-65.

11  
12  
13 48 Sweileh WM, Abu-Hadeed HM, Al-Jabi SW, et al. Prevalence of depression  
14 among people with type 2 diabetes mellitus: a cross sectional study in Palestine. *BMC*  
15 *Public Health* 2014;14:163.

16  
17  
18 49 Kikuchi Y, Iwase M, Fujii H, et al. Association of severe hypoglycemia with  
19 depressive symptoms in patients with type 2 diabetes: the Fukuoka Diabetes Registry.  
20 *BMJ Open Diabetes Res Care* 2015;3:e000063.

21  
22  
23 50 Luca A, Luca M, Di Mauro M, et al. Alexithymia, more than depression,  
24 influences glycaemic control of type 2 diabetic patients. *J Endocrinol Invest*  
25 2015;38:653-60.

26  
27  
28 51 Rodríguez Calvín JL, Zapatero Gaviria A, Martín Ríos MD. Prevalence of  
29 depression in type 2 diabetes mellitus. *Revista Clínica Española (English Edition)*  
30 2015;215:156-64.

31  
32  
33 52 Zhang Y, Ting RZ, Yang W, et al. Depression in Chinese patients with type 2  
34 diabetes: associations with hyperglycemia, hypoglycemia, and poor treatment  
35 adherence. *J Diabetes* 2015;7:800-8.

36  
37  
38 53 Cols-Sagarra C, Lopez-Simarro F, Alonso-Fernandez M, et al. Prevalence of  
39 depression in patients with type 2 diabetes attended in primary care in Spain. *Prim*  
40 *Care Diabetes* 2016.

41  
42  
43 54 Habtewold TD, Alemu SM, Haile YG. Sociodemographic, clinical, and  
44 psychosocial factors associated with depression among type 2 diabetic outpatients in

1  
2  
3 Black Lion General Specialized Hospital, Addis Ababa, Ethiopia: a cross-sectional  
4 study. *BMC Psychiatry* 2016;16:103.

5  
6  
7 55 Harris PA. The impact of age, gender, race, and ethnicity on the diagnosis and  
8 treatment of depression. *J Manag Care Pharm* 2004;10:S2-7.

9  
10  
11 56 Skinner TC, Carey ME, Cradock S, et al. Depressive symptoms in the first year  
12 from diagnosis of Type 2 diabetes: results from the DESMOND trial. *Diabet Med*  
13 2010;27:965-7.

14  
15  
16 57 Thoolen BJ, de Ridder DT, Bensing JM, et al. Psychological outcomes of patients  
17 with screen-detected type 2 diabetes: the influence of time since diagnosis and  
18 treatment intensity. *Diabetes Care* 2006;29:2257-62.

19  
20  
21 58 Petrak F, Stridde E, Leverkus F, et al. Development and validation of a new  
22 measure to evaluate psychological resistance to insulin treatment. *Diabetes Care*  
23 2007;30:2199-204.

24  
25  
26 59 Brod M, Kongso JH, Lessard S, et al. Psychological insulin resistance: patient  
27 beliefs and implications for diabetes management. *Qual Life Res* 2009;18:23-32.

28  
29  
30 60 Polonsky WH, Hajos TR, Dain MP, et al. Are patients with type 2 diabetes  
31 reluctant to start insulin therapy? An examination of the scope and underpinnings of  
32 psychological insulin resistance in a large, international population. *Curr Med Res*  
33 *Opin* 2011;27:1169-74.

34  
35  
36 61 Guyatt GH, Oxman AD, Kunz R, et al. GRADE guidelines 6. Rating the quality  
37 of evidence--imprecision. *J Clin Epidemiol* 2011;64:1283-93.

38  
39  
40 62 Anderson RJ, Freedland KE, Clouse RE, et al. The prevalence of comorbid  
41 depression in adults with diabetes: a meta-analysis. *Diabetes Care* 2001;24:1069-78.

## Figure legends

**Figure 1.** The selection process for eligible studies.

**Figure 2.** The pooled adjusted odds ratio for the risk of depression in insulin-prescribed patients compared with those without insulin therapy.

**Figure 3.** The pooled crude odds ratio for the risk of depression in insulin-prescribed patients compared with those without insulin therapy.

**Figure 4.** The funnel plot for the studies reporting adjusted odds ratios.

**Figure 5.** The funnel plot for the studies presenting crude odds ratios.

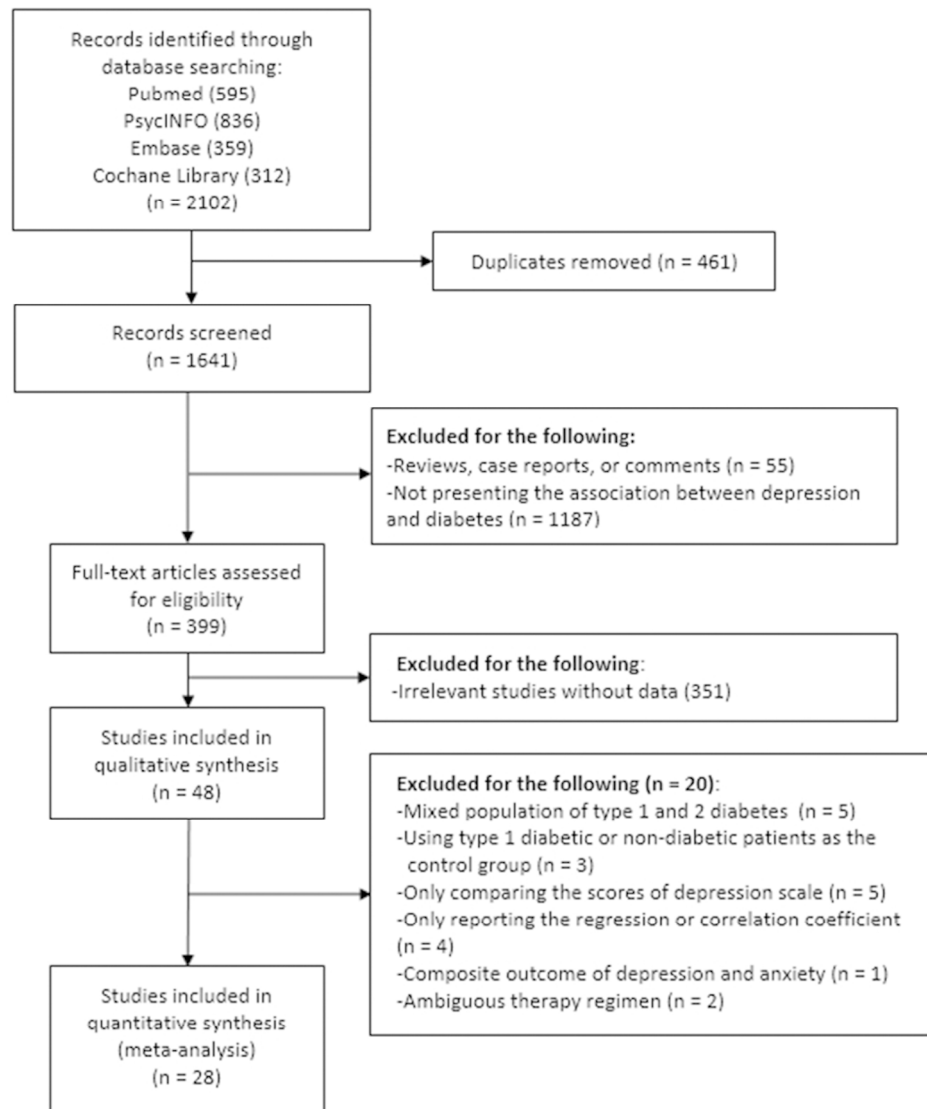

192x217mm (300 x 300 DPI)

1  
2  
3  
4  
5  
6  
7  
8  
9  
10  
11  
12  
13  
14  
15  
16  
17  
18  
19  
20  
21  
22  
23  
24  
25  
26  
27  
28  
29  
30  
31  
32  
33  
34  
35  
36  
37  
38  
39  
40  
41  
42  
43  
44  
45  
46  
47  
48  
49  
50  
51  
52  
53  
54  
55  
56  
57  
58  
59  
60



170x116mm (300 x 300 DPI)

View only

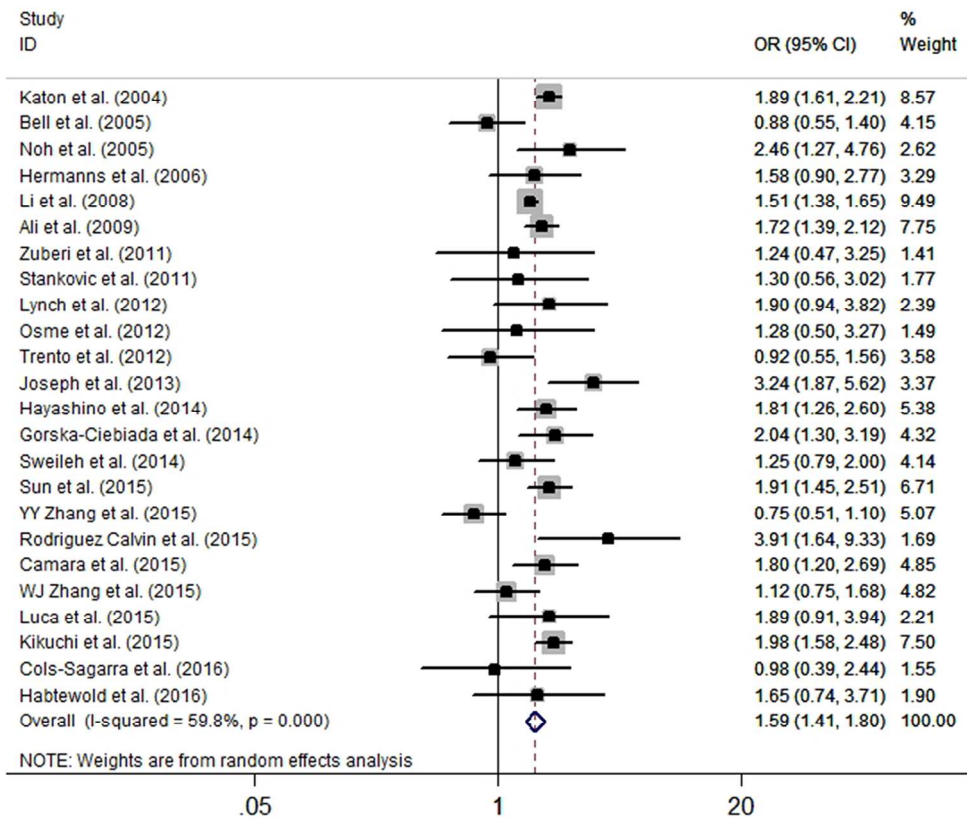

170x140mm (300 x 300 DPI)

1  
2  
3  
4  
5  
6  
7  
8  
9  
10  
11  
12  
13  
14  
15  
16  
17  
18  
19  
20  
21  
22  
23  
24  
25  
26  
27  
28  
29  
30  
31  
32  
33  
34  
35  
36  
37  
38  
39  
40  
41  
42  
43  
44  
45  
46  
47  
48  
49  
50  
51  
52  
53  
54  
55  
56  
57  
58  
59  
60

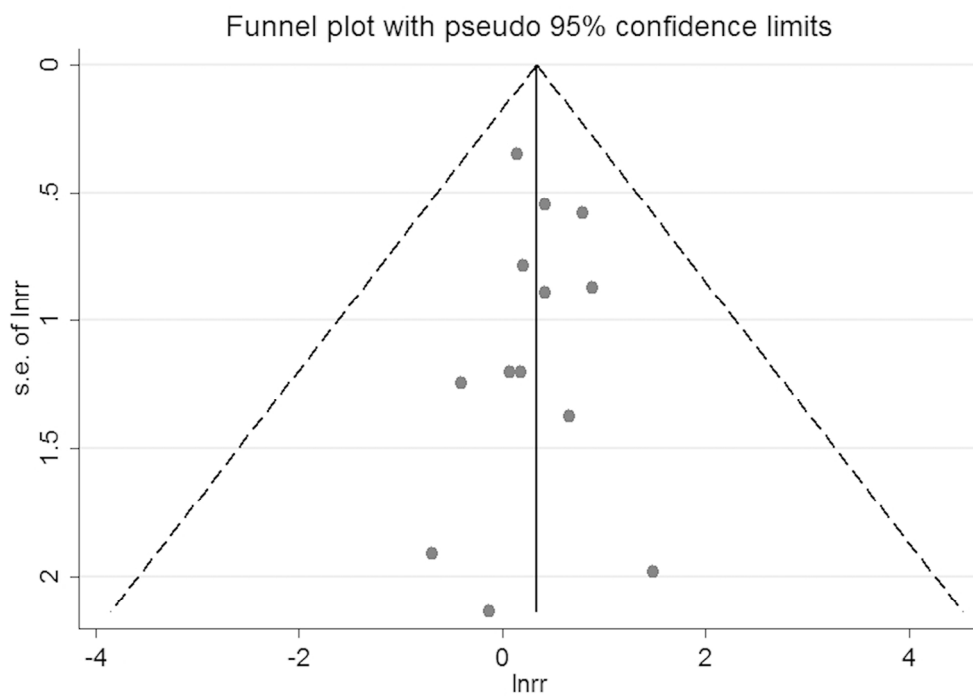

170x119mm (300 x 300 DPI)

Review only

1  
2  
3  
4  
5  
6  
7  
8  
9  
10  
11  
12  
13  
14  
15  
16  
17  
18  
19  
20  
21  
22  
23  
24  
25  
26  
27  
28  
29  
30  
31  
32  
33  
34  
35  
36  
37  
38  
39  
40  
41  
42  
43  
44  
45  
46  
47  
48  
49  
50  
51  
52  
53  
54  
55  
56  
57  
58  
59  
60



170x119mm (300 x 300 DPI)

new only



Supplementary Figure S1. Sensitivity analysis for adjusted data

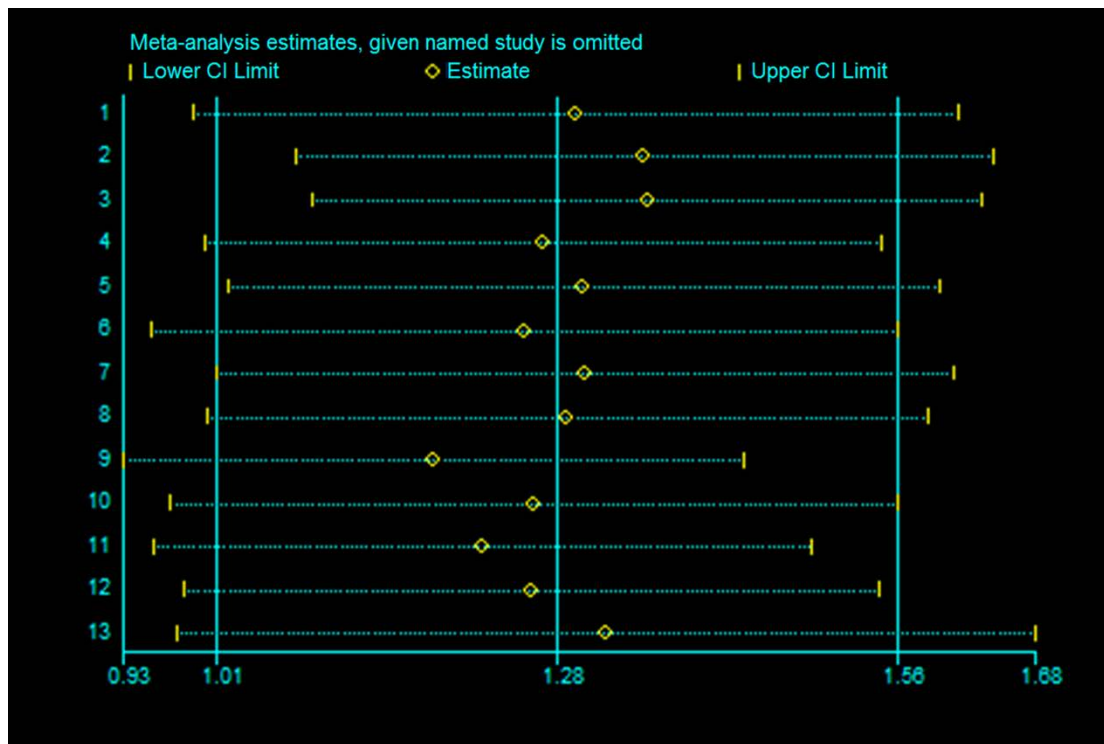

review only

1  
2  
3  
4  
5  
6  
7  
8  
9  
10  
11  
12  
13  
14  
15  
16  
17  
18  
19  
20  
21  
22  
23  
24  
25  
26  
27  
28  
29  
30  
31  
32  
33  
34  
35  
36  
37  
38  
39  
40  
41  
42  
43  
44  
45  
46  
47  
48  
49  
50  
51  
52  
53  
54  
55  
56  
57  
58  
59  
60

Supplementary Figure S2. Sensitivity analysis for crude data



review only

**Search strategy in Pubmed**

1. Depression [Mesh]
2. Depressive Disorder
3. Depressive Disorder, Major
4. Dysthymic Disorder
5. dysthym\*.mp.
6. depress\*.mp.
7. 1 or 2 or 3 or 4 or 5 or 6
8. random\* controlled trial.mp.
9. cross-sectional.mp.
10. case-control.mp.
11. cohort.mp.
12. Randomized Controlled Trial
13. Cross-Sectional Studies
14. Case-Control Studies
15. Cohort Studies
16. 8 or 9 or 10 or 11 or 12 or 13 or 14 or 15
17. Diabetes mellitus [Mesh]
18. Diabetes
19. diabetic. mp
20. Blood Glucose
21. 17 or 18 or 19 or 20
22. insulin [Mesh]
23. Insulin, Lente
24. Insulin Aspart
25. Insulin Lispro
26. Insulin, Short-Acting
27. Insulin, Long-Acting
28. 22 or 23 or 24 or 25 or 26 or 27
29. 7 and 16 and 21 and 28

**MOOSE Statement - Reporting Checklist for Authors, Editors, and Reviewers of Meta-analyses of Observational Studies**

| Reporting Criteria                                                                                                                         | Reported (Yes/No) | Reported on Page |
|--------------------------------------------------------------------------------------------------------------------------------------------|-------------------|------------------|
| <b>Reporting of background should include</b>                                                                                              |                   |                  |
| Problem definition                                                                                                                         | Yes               | 4                |
| Hypothesis statement                                                                                                                       | Yes               | 4                |
| Description of study outcomes                                                                                                              | Yes               | 4                |
| Type of exposure or intervention used                                                                                                      | Yes               | 4                |
| Type of study designs used                                                                                                                 | Yes               | 4                |
| Study population                                                                                                                           | Yes               | 4                |
| <b>Reporting of search strategy should include</b>                                                                                         |                   |                  |
| Qualifications of searchers (eg librarians and investigators)                                                                              | Yes               | 5                |
| Search strategy, including time period used in the synthesis and key words                                                                 | Yes               | 5                |
| Effort to include all available studies, including contact with authors                                                                    | Yes               | 5                |
| Databases and registries searched                                                                                                          | Yes               | 5                |
| Search software used, name and version, including special features used (eg explosion)                                                     | Yes               | 5                |
| Use of hand searching (eg reference lists of obtained articles)                                                                            | Yes               | 5                |
| List of citations located and those excluded, including justification                                                                      | Yes               | 7                |
| Method of addressing articles published in languages other than English                                                                    | Yes               | 5                |
| Method of handling abstracts and unpublished studies                                                                                       | Yes               | 5                |
| Description of any contact with authors                                                                                                    | No                | NA               |
| <b>Reporting of methods should include</b>                                                                                                 |                   |                  |
| Description of relevance or appropriateness of studies assembled for assessing the hypothesis to be tested                                 | No                | NA               |
| Rationale for the selection and coding of data (eg sound clinical principles or convenience)                                               | Yes               | 5                |
| Documentation of how data were classified and coded (eg multiple raters, blinding and interrater reliability)                              | Yes               | 6                |
| Assessment of confounding (eg comparability of cases and controls in studies where appropriate)                                            | Yes               | 6                |
| Assessment of study quality, including blinding of quality assessors, stratification or regression on possible predictors of study results | Yes               | 6                |

|                                                                                                                                                                                                                                                                             |     |         |
|-----------------------------------------------------------------------------------------------------------------------------------------------------------------------------------------------------------------------------------------------------------------------------|-----|---------|
| Assessment of heterogeneity                                                                                                                                                                                                                                                 | Yes | 6       |
| Description of statistical methods (eg complete description of fixed or random effects models, justification of whether the chosen models account for predictors of study results, dose-response models, or cumulative meta-analysis) in sufficient detail to be replicated | Yes | 6       |
| Provision of appropriate tables and graphics                                                                                                                                                                                                                                | Yes | 6       |
| <b>Reporting of results should include</b>                                                                                                                                                                                                                                  |     |         |
| Graphic summarizing individual study estimates and overall estimate                                                                                                                                                                                                         | Yes | 9-15    |
| Table giving descriptive information for each study included                                                                                                                                                                                                                | Yes | 9-15    |
| Results of sensitivity testing (eg subgroup analysis)                                                                                                                                                                                                                       | Yes | 19-22   |
| Indication of statistical uncertainty of findings                                                                                                                                                                                                                           | Yes | 19-22   |
| <b>Reporting of discussion should include</b>                                                                                                                                                                                                                               |     |         |
| Quantitative assessment of bias (eg publication bias)                                                                                                                                                                                                                       | Yes | 23      |
| Justification for exclusion (eg exclusion of non-English language citations)                                                                                                                                                                                                | No  | 23      |
| Assessment of quality of included studies                                                                                                                                                                                                                                   | Yes | Table 2 |
| Strengths and weaknesses                                                                                                                                                                                                                                                    | Yes | 24-25   |
| <b>Reporting of conclusions should include</b>                                                                                                                                                                                                                              |     |         |
| Consideration of alternative explanations for observed results                                                                                                                                                                                                              | Yes | 23-24   |
| Generalization of the conclusions (eg appropriate for the data presented and within the domain of the literature review)                                                                                                                                                    | Yes | 25      |
| Guidelines for future research                                                                                                                                                                                                                                              | Yes | 25      |
| Disclosure of funding source                                                                                                                                                                                                                                                | Yes | 26      |

NA: Not Applicable
