# Supplementary material for: The association between insulin therapy and depression in patients with type 2 diabetes mellitus: a meta-analysis
Source: PubMed Central journal article supplement — BMJ Open. 2018 Nov 28;8(11):e020062. doi: 10.1136/bmjopen-2017-020062 (PMC6278799; doi:10.1136/bmjopen-2017-020062), 2018-11-28

Supplementary Figure S1. Sensitivity analysis for adjusted data

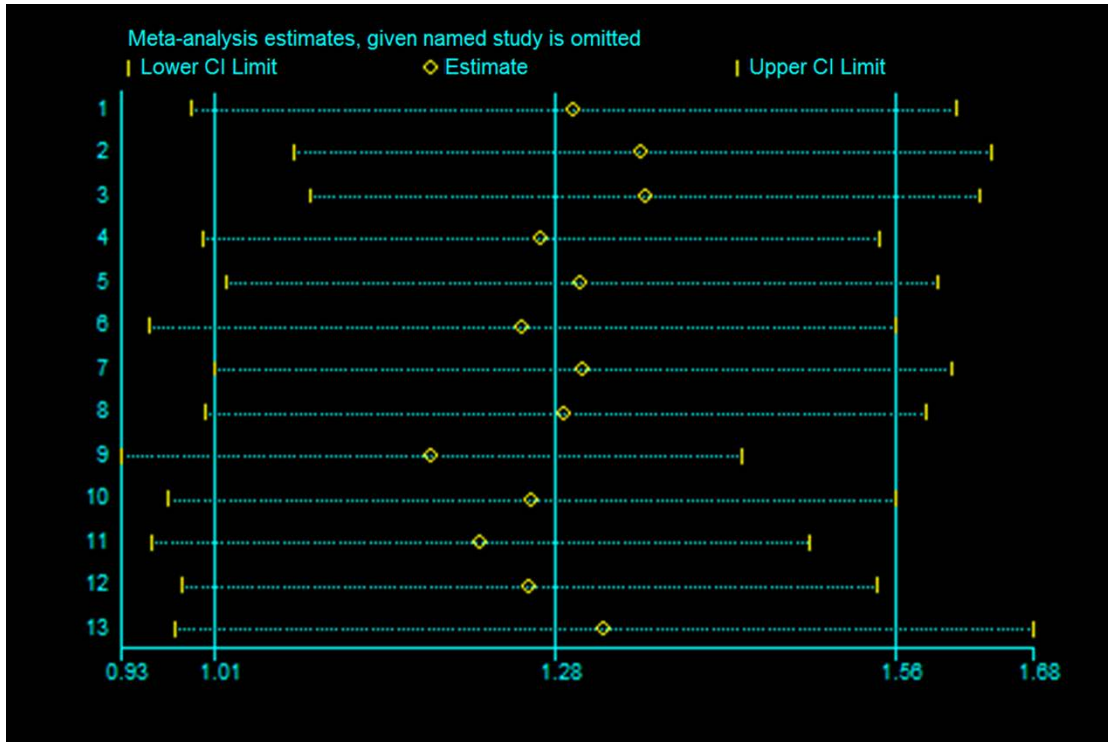

Supplementary Figure S2. Sensitivity analysis for crude data

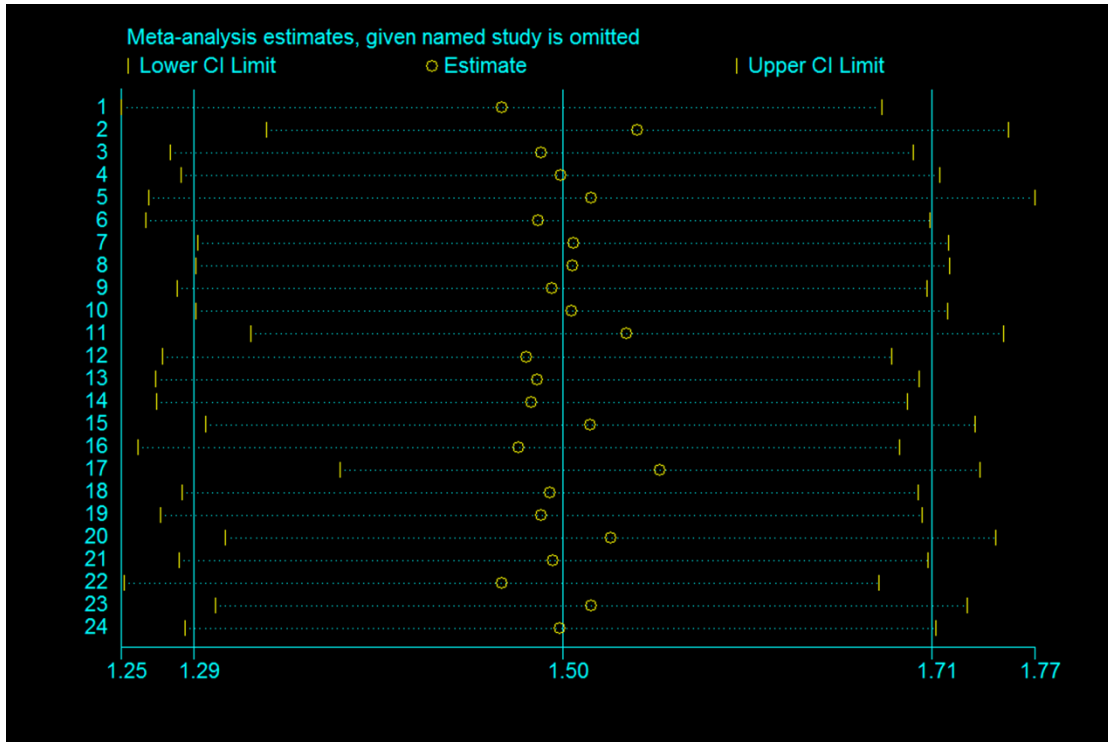

Supplement: bmjopen-2017-020062supp001.pdf [file bmjopen-2017-020062supp001.pdf]
