# Supplementary material for: The association between insulin therapy and depression in patients with type 2 diabetes mellitus: a meta-analysis
Source: PubMed Central journal article supplement — BMJ Open. 2018 Nov 28;8(11):e020062. doi: 10.1136/bmjopen-2017-020062 (PMC6278799; doi:10.1136/bmjopen-2017-020062), 2018-11-28
Supplement: bmjopen-2017-020062supp002.pdf [file bmjopen-2017-020062supp002.pdf]

### **Search strategy in Pubmed**

1. Depression [Mesh]
2. Depressive Disorder
3. Depressive Disorder, Major
4. Dysthymic Disorder
5. dysthym\*.mp.
6. depress\*.mp.
7. 1 or 2 or 3 or 4 or 5 or 6
8. random\* controlled trial.mp.
9. cross-sectional.mp.
10. case-control.mp.
11. cohort.mp.
12. Randomized Controlled Trial
13. Cross-Sectional Studies
14. Case-Control Studies
15. Cohort Studies
16. 8 or 9 or 10 or 11 or 12 or 13 or 14 or 15
17. Diabetes mellitus [Mesh]
18. Diabetes
19. diabetic. mp
20. Blood Glucose
21. 17 or 18 or 19 or 20
22. insulin [Mesh]
23. Insulin, Lente
24. Insulin Aspart
25. Insulin Lispro
26. Insulin, Short-Acting
27. Insulin, Long-Acting
28. 22 or 23 or 24 or 25 or 26 or 27
29. 7 and 16 and 21 and 28
